# Supplementary material for: New Lipophenol Antioxidants Reduce Oxidative Damage in Retina Pigment Epithelial Cells
Source: PubMed Central journal article supplement (PMC6315395; doi:10.3390/antiox7120197), 2018-12-19

# New lipophenol antioxidants reduce oxidative damage in retina pigment epithelial cells.

Espérance Moine <sup>1</sup>, Philippe Brabet <sup>2</sup>, Laurent Guillou <sup>2</sup>, Thierry Durand <sup>1</sup>, Joseph Vercauteren <sup>1</sup> and Céline Crauste <sup>1,\*</sup>

<sup>1</sup> Institute of Biomolécules Max Mousseron (IBMM), UMR 5247-CNRS-UM-ENSCM, Faculty of Pharmacy, 15 av. Charles Flahault, 34093 Montpellier, France, celine.crauste@umontpellier.fr

<sup>2</sup> Institute for Neurosciences of Montpellier, INSERM U1051-UM, Hospital St Eloi, 80 rue Augustin Fliche, 34091 Montpellier, France, philippe.brabet@inserm.fr

\* Correspondence: celine.crauste@umontpellier.fr; Tel.: +33-4-11-75-95-66

## Supplementary materials

Experimental procedures for lipophenols synthesis.

Figure S1: Graphical representation of *in vitro* evaluations of lipophenols.

Figure S2: Full NMR spectra characterization of derivatives from 2 to 18 (<sup>1</sup>H and <sup>13</sup>C).

## Experimental procedures for lipophenols synthesis.

**3,5-bis(triisopropylsilyloxy)phenol (1):** was synthesized according to the procedure described by Crauste *et al.* 2014 [26].

**(9,12Z)-3,5-bis(triisopropylsilyloxy)phenyl-octadeca-9,12-dienoate (2):** To a solution of linoleic acid (77 mg, 0.27 mmol), dicyclohexylcarbodiimide (62 mg, 0.30 mmol) and 4-dimethylaminopyridine (10 mg, 0.08 mmol) in anhydrous CH<sub>2</sub>Cl<sub>2</sub> (2 mL) stirred under N<sub>2</sub>, was added a solution of compound **1** (120 mg, 0.27 mmol) in anhydrous CH<sub>2</sub>Cl<sub>2</sub> (2 mL). The resulting mixture was stirred at room temperature for 2 h and cooled to 4 °C for 1 h to afford filtration of the precipitate. The filtrate was washed with water and brine, dried over MgSO<sub>4</sub>, filtered and evaporated under reduced pressure. Purification of the residue was performed by silica column chromatography using hexane/EtOAc (99:1 v/v) as eluent to give compound **2** (120 mg, 62%) as colorless oil. *R<sub>f</sub>* (hexane/EtOAc, 99:1) = 0.26. <sup>1</sup>H NMR (500 MHz, CDCl<sub>3</sub>) δ 6.28 (t, *J* = 1.9 Hz, 1H, H<sub>4</sub>), 6.24 (d, *J* = 1.9 Hz, 2H, H<sub>2</sub>, H<sub>6</sub>), 5.44 – 5.27 (m, 4H, 2 × CH=CH), 2.78 (t, *J* = 6.6 Hz, 2H, H<sub>11'</sub>), 2.50 (t, *J* = 7.5 Hz, 2H, H<sub>2'</sub>), 2.12 – 1.99 (m, 4H, H<sub>8'</sub>, H<sub>14'</sub>), 1.66 (qt, *J* = 7.5 Hz, 2H, H<sub>3'</sub>), 1.43 – 1.17 (m, 20H, H<sub>4'</sub>, H<sub>5'</sub>, H<sub>6'</sub>, H<sub>7'</sub>, H<sub>15'</sub>, H<sub>16'</sub>, H<sub>17'</sub>, 6 × CHTIPS), 1.10 – 0.95 (m, 36H, 12 × CH<sub>3</sub>TIPS), 0.89 (t, *J* = 6.8 Hz, 3H, H<sub>18'</sub>). <sup>13</sup>C NMR (125 MHz, CDCl<sub>3</sub>) δ 171.9, 157.1 (2C), 151.8, 130.2, 130.0, 128.1, 127.9, 109.3, 106.9, 34.4, 31.5, 29.6 (2C), 29.4 (2C), 29.2, 29.2, 29.1, 27.2, 25.6, 24.9, 22.6, 17.9 (12C), 14.1, 12.6 (6C). HRMS (ESI+I): calculated for C<sub>42</sub>H<sub>77</sub>O<sub>4</sub>Si<sub>2</sub> [M + H]<sup>+</sup> 701.5355; found 701.5366.

**(9Z,12Z)-3,5-dihydroxyphenyl octadeca-9,12-dienoate (phloro-LA, 3):** To a solution of compound **2** (59 mg, 0.08 mmol) in anhydrous THF (4 mL) stirred under N<sub>2</sub>, was added dropwise triethylamine trihydrofluoride (41 μL, 0.24 mmol). The resulting mixture was stirred at room temperature for 9 h, diluted in EtOAc and washed with water and brine. The organic layer was dried over MgSO<sub>4</sub>, filtered and evaporated under reduced pressure. Purification of the residue was performed by silica column chromatography using hexane/EtOAc (80:20 v/v) as eluent to give compound **3** (30 mg, 92%) as colorless oil. *R<sub>f</sub>* (hexane/EtOAc, 70:30) = 0.30. <sup>1</sup>H NMR (500 MHz, CDCl<sub>3</sub>) δ 6.06 (s, 3H, H<sub>2</sub>, H<sub>4</sub>, H<sub>6</sub>), 5.45 – 5.27 (m, 4H, 2 × CH=CH), 2.78 (t, *J* = 6.8 Hz, 2H, H<sub>11'</sub>), 2.57 (t, *J* = 7.5 Hz, 2H, H<sub>2'</sub>), 2.10 – 2.00 (m, 4H, H<sub>8'</sub>, H<sub>14'</sub>), 1.75 (qt, *J* = 7.5 Hz, 2H, H<sub>3'</sub>), 1.46 – 1.22 (m, 14H, H<sub>4'</sub>, H<sub>5'</sub>, H<sub>6'</sub>, H<sub>7'</sub>, H<sub>15'</sub>, H<sub>16'</sub>, H<sub>17'</sub>), 0.89 (t, *J* = 6.8 Hz, 3H, H<sub>18'</sub>). <sup>13</sup>C NMR (125 MHz, CDCl<sub>3</sub>) δ 174.6, 157.4 (2C), 151.7, 130.3, 130.0, 128.1, 127.9, 102.0, 101.5, 34.4, 31.5, 29.6 (2C), 29.4 (2C), 29.2, 29.1, 29.1, 27.2, 25.7, 24.9, 22.6, 14.1. HRMS (ESI-I): calculated for C<sub>24</sub>H<sub>35</sub>O<sub>4</sub> [M - H]<sup>-</sup> 387.2535; found 387.2534.

**(E)-4-(3,5-dihydroxystyryl)phenyl acetate (4):** resveratrol (2.88 g, 12.61 mmol) was dissolved in 2-methylbutan-2-ol (280 mL) and vinyl acetate (72.40 mL, 756.70 mmol) in presence of the supported lipase *Candida Antarctica* (Novozyme 435, CalB, 14.40 g). The mixture was stirred with a rotary evaporator at 40°C during 4 days, protected from sunlight by aluminium foil. The lipase was then filtered off and washed with EtOAc and diethyl ether. The filtrate obtained was concentrated under reduced pressure and the residue obtained was purified by chromatography on silica gel using solid deposit using CH<sub>2</sub>Cl<sub>2</sub>/MeOH (99/1 to 98/2 v/v) as eluent to give the 4'-O-acetyl resveratrol **4** (2.89 mg, 85%) as white solid. *R<sub>f</sub>* (CH<sub>2</sub>Cl<sub>2</sub>/MeOH, 95:5) = 0.3. Mp 199.1 °C. <sup>1</sup>H NMR (500 MHz, MeOD) δ 7.54 (d, *J* = 7.6 Hz, 2H, H<sub>2'</sub>, H<sub>6'</sub>), 7.07 (d, *J* = 7.6 Hz, 2H, H<sub>3'</sub>, H<sub>5'</sub>), 7.04 (d, *J* = 16.2 Hz, 1H, H<sub>8</sub>), 6.97 (d, *J* = 16.2 Hz, 1H, H<sub>7</sub>), 6.49 (s, 2H, H<sub>2</sub>, H<sub>6</sub>), 6.21-6.19 (m, 1H, H<sub>4</sub>), 2.27 (s, 3H, CH<sub>3</sub>OCO). <sup>13</sup>C NMR (125 MHz, MeOD) δ 171.1, 159.7 (2C), 151.5, 140.6, 136.6, 130.2, 128.3, 128.3, 122.9 (2C), 122.9, 106.1 (2C), 103.2, 20.9. HRMS (ESI+I): calculated for C<sub>16</sub>H<sub>15</sub>O<sub>4</sub> [M + H]<sup>+</sup> 271.0964; found 271.0972.

**(E)-4-(3,5-bis((triisopropylsilyloxy)styryl)phenyl acetate (5):** 4'-O-acetyl resveratrol **4** (3.18 g, 11.78 mmol) was dissolved in dry THF (160 mL). DIPEA (4.20 mL, 24.70 mmol) and TIPS-OTf (6.70 mL, 24.70 mmol) were added dropwise to the solution and the reaction mixture was stirred at room temperature during 4.5h. Additional amount of DIPEA (1.0 mL, 5.90 mmol) and TIPS-OTf (1.6 mL,

5.90 mmol) were added to reach completion of the reaction. After 2.5 additional hours of reaction, the solvent was evaporated under reduced pressure. The residue obtained was dissolved in EtOAc and washed with water (x2) and brine. The organic phase was dried over MgSO<sub>4</sub> and concentrated under vacuum. The residue obtained was purified by chromatography on silica gel using pentane/EtOAc (99:1 to 70:30 v/v) as eluent to give the protected resveratrol **5** (6.85 g, 90%) as a colorless oil. *R<sub>f</sub>* (pentane/EtOAc, 95:5) = 0.5. <sup>1</sup>H NMR (500 MHz, CDCl<sub>3</sub>) δ 7.51 (d, *J* = 8.0 Hz, 2H, H2', H6'), 7.09 (d, *J* = 8.0 Hz, 2H, H3', H5'), 6.98 (d, *J* = 16.3 Hz, 1H, H8), 6.92 (d, *J* = 16.3 Hz, 1H, H7), 6.65 (s, 2H, H2, H6), 6.37 – 6.36 (m, 1H, H4), 2.31 (s, 3H, CH<sub>3</sub>OCO), 1.26 (m, 6H, 6 × CHTIPS), 1.12 (d, *J* = 7.6 Hz, 36H, 12 × CH<sub>3</sub>TIPS). <sup>13</sup>C NMR (125 MHz, CDCl<sub>3</sub>) δ 169.7, 157.3 (2C), 150.2, 139.0, 135.3, 129.3, 127.8, 127.7 (2C), 122.0 (2C), 111.6 (2C), 111.5, 21.4, 18.2 (6C), 12.9 (12C). HRMS (ESI+I): calculated for C<sub>34</sub>H<sub>55</sub>O<sub>4</sub>Si<sub>2</sub> [M + H]<sup>+</sup> 583.3633; found 583.3640.

**(E)-4-(3,5-bis((triisopropylsilyl)oxy)styryl)phenol (6):** The protected resveratrol **5** (6.85 g, 10.59 mmol) was dissolved in dry MeOH (58 mL) and CH<sub>2</sub>Cl<sub>2</sub> (28 mL). Sodium methoxide (191 mg, 3.53 mmol) was added to the solution and the reaction mixture was stirred at room temperature during 4.5h. Further, 0.3 eq of NaOMe (191 mg, 3.53 mmol) was added to drive the reaction to completion. After additional 2h, the solvent was evaporated under reduced pressure. The residue obtained was purified by chromatography on silica gel using pentane/EtOAc (96:4 to 90:10 v/v) as eluent to give the 4'-deprotected resveratrol **6** (6.04 g, 95%) as a colorless oil. *R<sub>f</sub>* (hexane/EtOAc, 90:10) = 0.41. <sup>1</sup>H NMR (500 MHz; MeOD) δ 7.38 (d, *J* = 8.5 Hz, 2H, H2', H6'), 6.95 (d, *J* = 16.2 Hz, 1H, H8), 6.84 (d, *J* = 16.2 Hz, 1H, H7), 6.77 (d, *J* = 8.5 Hz, 2H, H3', H5'), 6.64 – 6.63 (m, 2H, H2, H6), 6.30 – 6.29 (m, 1H, H4), 1.30 – 1.22 (m, 6H, 6 × CHTIPS), 1.14 (d, *J* = 7.5 Hz, 36H, 12 × CH<sub>3</sub>TIPS). <sup>13</sup>C NMR (125 MHz; MeOD) δ 158.5, 158.3 (2C), 141.3, 130.1, 129.9, 129.0 (2C), 126.5, 116.5 (2C), 112.1 (2C), 111.4, 18.4 (6C), 13.9 (12C). HRMS (ESI+I): calculated for C<sub>32</sub>H<sub>53</sub>O<sub>3</sub>Si<sub>2</sub> [M + H]<sup>+</sup> 541.3527; found 541.3536.

**(9,12Z)-4-((E)-3,5-bis((triisopropylsilyl)oxy)styryl)phenyl octadeca-9,12-dienoate (7):** Compound **6** (1.00 g, 1.67 mmol) and linoleic acid (623 mg, 2.22 mmol) were dissolved in anhydrous CH<sub>2</sub>Cl<sub>2</sub> (40 mL). Dicyclohexylcarbodiimide (573 mg, 2.78 mmol) and 4-dimethylaminopyridine (113 mg, 0.93 mmol) were added to the reaction and the resulting mixture was stirred at room temperature under N<sub>2</sub> for 3 h before cooling to 4 °C for 1 h to afford filtration of the precipitate. The filtrate was washed with water and brine, dried over MgSO<sub>4</sub>, filtered and evaporated under reduced pressure. Purification of the residue was performed by silica column chromatography using pentane/EtOAc (99.5:0.5 to 99:1 v/v) as eluent to give compound **6** as a colorless oil (1.10 g, 74%). *R<sub>f</sub>* (pentane/EtOAc, 95:5) = 0.7. <sup>1</sup>H NMR (500 MHz, CDCl<sub>3</sub>) δ 7.79 (d, *J* = 8.5 Hz, 2H, H2', H6'), 7.06 (d, *J* = 8.5 Hz, 2H, H3', H5'), 6.97 (d, *J* = 16 Hz, 1H, H8), 6.91 (d, *J* = 16 Hz, 1H, H7), 6.64 (d, *J* = 1.5 Hz, 2H, H2, H6), 6.3 (t, *J* = 1.5 Hz, 1H, H4), 5.41 – 5.33 (m, 4H, 2 × CH=CH), 2.78 (t, *J* = 6.5 Hz, 2H, H11''), 2.55 (t, *J* = 7.5 Hz, 2H, H2''), 2.07 – 2.03 (m, 4H, H8'', H14''), 1.75 (qt, *J* = 7.5 Hz, 2H, H3''), 1.42 – 1.22 (m, 20H, H4'', H5'', H6'', H7'', H15'', H16'', H17'', 6 × CHTIPS), 1.11 (d, *J* = 7.5 Hz, 36 H, 12 × CH<sub>3</sub>TIPS), 0.89 (t, *J* = 7 Hz, 3H, H18''). <sup>13</sup>C NMR (125 MHz, CDCl<sub>3</sub>) δ 172.6, 157.4 (2C), 150.4, 139.1, 135.3, 130.6, 130.3, 129.3, 128.4, 128.2, 127.9, 127.7 (2C), 122.1 (2C), 111.7 (2C), 111.6, 34.8, 31.8, 29.9, 29.7, 29.5, 29.4, 29.4, 27.5, 27.5, 26.0, 25.3, 22.9, 18.2 (6C), 14.4, 13.0 (12C). HRMS (ASAP+I): calculated for C<sub>50</sub>H<sub>83</sub>O<sub>4</sub>Si<sub>2</sub> [M + H]<sup>+</sup> 803.5830; found 803.5815.

**(9,12Z)-4-((E)-3,5-dihydroxystyryl)phenyl octadeca-9,12-dienoate (Resv-4'-LA, 8):** To a solution of compound **7** (1.08 g, 1.35 mmol) in anhydrous THF (60 mL) stirred under N<sub>2</sub>, was added dropwise triethylamine trihydrofluoride (1.32 mL, 8.08 mmol). The reaction was stirred at room temperature and further equivalents of triethylamine trihydrofluoride (2×0.66 mL, 2×4.04 mmol) were added at four and six hours of reaction time. Reaction was terminated after another two hours. The resulting mixture was evaporated and the residue was dissolved in EtOAc. Organic phases were washed with water and brine, dried over MgSO<sub>4</sub>, filtered and evaporated under reduced pressure. Crude product was purified by column chromatography on silica gel using pentane/EtOAc (70:30 to 60:40 v/v) as eluent to obtain the desired compound **8** (546 mg, 83%) as a white solid. *R<sub>f</sub>* (pentane/EtOAc, 70:30) =

0.3. <sup>1</sup>H NMR (500 MHz, CDCl<sub>3</sub>) δ 7.34 (d, *J* = 8.5 Hz, 2H, H2', H6'), 7.00 (d, *J* = 8.5 Hz, 2H, H3', H5'), 6.79 (d, *J* = 16.5 Hz, 1H, H8), 6.70 (d, *J* = 16.5 Hz, 1H, H7), 6.40 (d, *J* = 2.0 Hz, 2H, H2, H6), 6.23 (t, *J* = 2.0 Hz, 1H, H4), 5.99 (bs, 2H, 2 × OH), 5.41 – 5.32 (m, 4H, 2 × CH=CH), 2.77 (t, *J* = 6.5 Hz, 2H, H11''), 2.56 (t, *J* = 7.5 Hz, 2H, H2''), 2.06 – 2.03 (m, 4H, H8'', H14''), 1.75 (qt, *J* = 7.5 Hz, 2H, H3''), 1.42 – 1.25 (m, 14H, H4'', H5'', H6'', H7'', H15'', H16'', H17''), 0.88 (t, *J* = 7 Hz, 3H, H18''). <sup>13</sup>C NMR (125 MHz, CDCl<sub>3</sub>) δ 173.5, 157.0 (2C), 150.1, 139.7, 135.1, 130.4, 130.2, 128.4, 128.2, 128.2, 128.0, 127.7 (2C), 121.8 (2C), 106.3 (2C), 102.6, 34.6, 31.7, 29.7, 29.5, 29.3, 29.3, 29.2, 27.3, 27.3, 25.7, 25.0, 22.7, 14.2. HRMS (ASAP+): calculated for C<sub>32</sub>H<sub>43</sub>O<sub>4</sub> [M + H]<sup>+</sup> 491.3161; found 491.3161.

**(9Z,12Z)-(2R,3S)-2-(3,4-dihydroxyphenyl)-5,7-dihydroxy-chroman-3-yl octadeca-9,12-dienoate (Cat-3-LA, 9):** To a suspension of freshly prepared linoleyl chloride (103 mg, 0.34 mmol) in anhydrous CH<sub>2</sub>Cl<sub>2</sub> (5 mL) stirred under N<sub>2</sub>, was added trifluoroacetic acid (26 μL, 0.34 mmol) and dropwise a suspension of dried (+)-catechin (100 mg, 0.34 mmol) in anhydrous DMF (2 mL). The resulting mixture was stirred at room temperature for 22 h and at 40 °C for 6 h, diluted in EtOAc/MeOH (3:1 v/v) and evaporated under reduced pressure. The crude product was dissolved in EtOAc, washed with water, dried over MgSO<sub>4</sub>, filtered and evaporated under reduced pressure. Purification of the residue was performed by silica column chromatography using CH<sub>2</sub>Cl<sub>2</sub>/MeOH (98:2 to 96:4 v/v) as eluent to give compound **9** (4.9 mg, 2.6%) as colorless oil. *R*<sub>f</sub> (CH<sub>2</sub>Cl<sub>2</sub>/MeOH, 80:20) = 0.80. <sup>1</sup>H NMR (500 MHz, MeOD) δ 6.80 (d, *J* = 2.0 Hz, 1H, H2'), 6.73 (d, *J* = 8.1 Hz, 1H, H5'), 6.68 (dd, *J* = 8.1, 2.0 Hz, 1H, H6'), 5.95 (d, *J* = 2.2 Hz, 1H, H8), 5.89 (d, *J* = 2.2 Hz, 1H, H6), 5.42 – 5.27 (m, 4H, 2 × CH=CH), 5.20 (dd, *J* = 12.4, 7.0 Hz, 1H, H3), 4.85 (d, *J* = 7.0 Hz, 1H, H2), 2.84 – 2.74 (m, 3H, H4β, H11''), 2.60 (dd, *J* = 16.3, 7.0 Hz, 1H, H4α), 2.20 (td, *J* = 7.3, 1.8 Hz, 2H, H2''), 2.06 (q, *J* = 6.9 Hz, 4H, H8'', H14''), 1.50 – 1.40 (m, 2H, H3''), 1.40 – 1.11 (m, 14H, H4'', H5'', H6'', H7'', H15'', H16'', H17''), 0.90 (t, *J* = 6.9 Hz, 3H, H18''). <sup>13</sup>C NMR (125 MHz, MeOD) δ 174.61, 158.17, 157.61, 156.60, 146.45, 146.31, 131.15, 130.98, 130.93, 129.09, 129.04, 119.53, 116.10, 114.79, 99.72, 96.49, 95.56, 79.68, 70.97, 35.22, 32.65, 30.68, 30.47, 30.17, 30.10, 29.90, 28.16, 28.14, 26.54, 26.00, 25.13, 23.61, 14.41. HRMS (ESI-I): calculated for C<sub>36</sub>H<sub>49</sub>O<sub>7</sub> [M-H]<sup>-</sup> 593.3478; found 593.3477.

**(9Z,12Z)-2-(3,4-((9Z,12Z)-dioctadeca-9,12-dienoyloxy)phenyl)-4-oxo-4H-chromen-3,5,7-triyl trioctadeca-9,12-dienoate (10):** To a solution of dried quercetin (0.1 g, 0.33 mmol) in 1,4-dioxan (8 mL) stirred under N<sub>2</sub>, was added distilled triethylamine (0.35 mL, 2.48 mmol) and a suspension of freshly prepared linoleyl chloride (0.74 g, 2.48 mmol) in 1,4-dioxan (2 mL). The resulting mixture was stirred in the dark at room temperature for 19 h and evaporated under reduced pressure. The crude product was dissolved in CH<sub>2</sub>Cl<sub>2</sub>, washed with aqueous saturated NaHCO<sub>3</sub> solution and water, dried over MgSO<sub>4</sub>, filtered and evaporated under reduced pressure. Purification of the residue was performed by silica column chromatography using CH<sub>2</sub>Cl<sub>2</sub>/MeOH (100:0 to 99:1 v/v) as eluent to give compound **10** (236 mg, 75%) as colorless oil. *R*<sub>f</sub> (CH<sub>2</sub>Cl<sub>2</sub>/MeOH, 99:1) = 0.67. <sup>1</sup>H NMR (500 MHz, CDCl<sub>3</sub>) δ 7.70 (dd, *J* = 8.6, 2.1 Hz, 1H, H6'), 7.66 (d, *J* = 2.1 Hz, 1H, H2'), 7.32 (d, *J* = 8.6 Hz, 1H, H5'), 7.31 (d, *J* = 2.1 Hz, 1H, H8), 6.84 (d, *J* = 2.1 Hz, 1H, H6), 5.47 – 5.25 (m, 20H, 10 × CH=CH), 2.81 – 2.75 (m, 10H, 5 × H11''), 2.73 (t, *J* = 7.6 Hz, 2H, H2''), 2.62 – 2.53 (m, 8H, 4 × H2''), 2.10 – 2.01 (m, 20H, 5 × H8'', 5 × H14''), 1.85 – 1.65 (m, 10H, 5 × H3''), 1.47 – 1.22 (m, 70H, 5 × H4'', 5 × H5'', 5 × H6'', 5 × H7'', 5 × H15'', 5 × H16'', 5 × H17''), 0.92 – 0.85 (m, 15H, 5 × H18''). <sup>13</sup>C NMR (125 MHz, CDCl<sub>3</sub>) δ 172.01, 170.77, 170.62, 170.58, 170.53, 169.97, 156.84, 154.27, 153.60, 150.53, 144.45, 142.27, 134.07, 130.23, 130.22, 130.21, 130.19, 130.18, 130.07, 130.03, 129.94, 129.89, 129.88, 128.11, 128.10, 128.08, 127.98, 127.97, 127.90, 127.88, 127.85, 127.82 (2C), 127.75, 126.37, 123.83, 123.77, 114.79, 113.86, 108.85, 34.35, 34.09, 34.05, 33.99, 33.73, 31.49 (5C), 29.63 (2C), 29.61, 29.59 (2C), 29.56, 29.32 (4C), 29.31, 29.24, 29.23, 29.19, 29.16, 29.15, 29.12, 29.11 (2C), 29.10, 29.09, 29.08, 29.04, 28.98, 28.97, 27.21, 27.20, 27.17 (3C), 27.16 (3C), 27.15, 27.14, 25.62 (5C), 24.86, 24.83, 24.66, 24.56, 24.41, 22.56 (5C), 14.07 (5C).

**(9Z,12Z,15Z)-2-(3,4-((9Z,12Z,15Z)-dioctadeca-9,12,15-trienoyloxy)phenyl)-4-oxo-4H-chromen-3,5,7-triyl trioctadeca-9,12,15-trienoate (11):** To a solution of α-linolenic acid (ALA, 244 mg, 0.88 mmol), dicyclohexylcarbodiimide (181 mg, 0.88 mmol) and 4-dimethylaminopyridine (10 mg, 0.08 mmol) in

anhydrous CH<sub>2</sub>Cl<sub>2</sub> (7 mL) stirred under N<sub>2</sub>, was added a suspension of dried quercetin (50 mg, 0.17 mmol) in anhydrous CH<sub>2</sub>Cl<sub>2</sub> (8 mL). The resulting mixture was stirred at room temperature for 4.5 h and cooled to 4 °C for 2 h to afford filtration of the precipitate. The filtrate was washed with water and brine, dried over MgSO<sub>4</sub>, filtered and evaporated under reduced pressure. Purification of the residue was performed by silica column chromatography using CH<sub>2</sub>Cl<sub>2</sub> as eluent to give compound **11** (84 mg, 32%) as yellow oil. *R<sub>f</sub>* (CH<sub>2</sub>Cl<sub>2</sub>/MeOH, 99:1) = 0.87. <sup>1</sup>H NMR (500 MHz, CDCl<sub>3</sub>) δ 7.73 (dd, *J* = 8.5, 2.1 Hz, 1H, H6'), 7.70 (d, *J* = 2.1 Hz, 1H, H2'), 7.34 (d, *J* = 8.5 Hz, 1H, H5'), 6.84 (d, *J* = 2.0 Hz, 1H, H8), 6.58 (d, *J* = 2.0 Hz, 1H, H6), 5.47 – 5.23 (m, 30H, 15 × CH=CH), 2.85 – 2.77 (m, 20H, 5 × H11", 5 × H14"), 2.63 (t, *J* = 7.5 Hz, 2H, H2"), 2.60 – 2.54 (m, 8H, 4 × H2"), 2.13 – 2.02 (m, 20H, 5 × H8", 5 × H17"), 1.81 – 1.69 (m, 10H, 5 × H3"), 1.48 – 1.28 (m, 40H, 5 × H4", 5 × H5", 5 × H6", 5 × H7"), 1.02 – 0.92 (m, 15H, 5 × H18"). <sup>13</sup>C NMR (125 MHz, CDCl<sub>3</sub>) δ 176.26, 171.08, 170.64 (2C), 170.60, 170.51, 161.67, 156.41, 155.91, 155.47, 144.71, 142.30, 132.19, 131.93 (2C), 131.92 (2C), 130.24 (2C), 130.17 (2C), 130.09 (2C), 130.08 (2C), 128.29 (2C), 128.25 (2C), 128.24 (2C), 128.21 (2C), 128.19 (2C), 128.15 (2C), 127.80 (2C), 127.75 (2C), 127.69, 127.47, 127.07, 126.46, 123.95, 123.93, 108.71, 105.44, 101.12, 34.37, 34.05 (2C), 34.00, 33.70, 29.60 (2C), 29.55 (2C), 29.23 (2C), 29.20 (2C), 29.12 (2C), 29.10 (2C), 29.08 (2C), 29.05 (2C), 29.00 (2C), 28.97 (2C), 27.20 (2C), 27.18 (3C), 25.59 (5C), 25.49 (5C), 24.84 (2C), 24.83, 24.73, 24.63, 20.52 (5C), 14.26 (5C).

**(4Z,7Z,10Z,13Z,16Z,19Z)-2-(3,4-((4Z,7Z,10Z,13Z,16Z,19Z)-didocosa-4,7,10,13,16,19-**

**hexaenoyloxy)phenyl)-4-oxo-4H-chromen-3,5,7-triyl tridocosa-4,7,10,13,16,19-hexaenoate (12):** To a solution of *cis*-4,7,10,13,16,19-docosahexaenoic acid (300 mg, 0.91 mmol), dicyclohexylcarbodiimide (188 mg, 0.91 mmol) and 4-dimethylaminopyridine (11 mg, 0.09 mmol) in anhydrous CH<sub>2</sub>Cl<sub>2</sub> (7 mL) stirred under N<sub>2</sub>, was added a suspension of dried quercetin (52 mg, 0.17 mmol) in anhydrous CH<sub>2</sub>Cl<sub>2</sub> (8 mL). The resulting mixture was stirred at room temperature for 19 h and cooled to 4 °C for 2 h to afford filtration of the precipitate. The filtrate was washed with water and brine, dried over MgSO<sub>4</sub>, filtered and evaporated under reduced pressure. Purification of the residue was performed by silica column chromatography using CH<sub>2</sub>Cl<sub>2</sub> as eluent to give compound **12** (98 mg, 31%) as yellow oil. *R<sub>f</sub>* (CH<sub>2</sub>Cl<sub>2</sub>) = 0.78. <sup>1</sup>H NMR (300 MHz, CDCl<sub>3</sub>) δ 7.76 – 7.70 (m, 2H, H2', H6'), 7.35 (dd, *J* = 8.0, 0.9 Hz, 1H, H5'), 6.85 (d, *J* = 2.0 Hz, 1H, H8), 6.59 (d, *J* = 2.0 Hz, 1H, H6), 5.58 – 5.23 (m, 60H, 30 × CH=CH), 2.93 – 2.76 (m, 50H, 5 × H6", 5 × H9", 5 × H12", 5 × H15", 5 × H18"), 2.76 – 2.60 (m, 10H, 5 × H2"), 2.59 – 2.46 (m, 10H, 5 × H3"), 2.07 (qt, *J* = 7.5 Hz, 10H, 5 × H21"), 0.97 (t, *J* = 7.5 Hz, 15H, 5 × H22"). <sup>13</sup>C NMR (75 MHz, CDCl<sub>3</sub>) δ 176.15, 170.36, 170.00 (2C), 169.95, 169.85, 161.69, 156.35, 155.89, 155.45, 144.64, 142.23, 132.21, 132.00 (5C), 130.05 (5C), 129.75 (5C), 128.50 (5C), 128.42 (5C), 128.28 (5C), 127.99 (5C), 127.81 (5C), 127.74 (5C), 127.48, 127.32 (5C), 127.09 (5C), 126.97 (5C), 126.54, 123.94 (2C), 108.74, 105.48, 101.11, 34.26, 33.91 (3C), 33.56, 25.60 (15C), 25.50 (10C), 22.52 (5C), 20.52 (5C), 14.25 (5C).

**(9Z,12Z)-2-(3,4-dihydroxyphenyl)-5,7-dihydroxy-4-oxo-4H-chromen-3-yl octadeca-9,12-dienoate**

**(Quer-3-LA, 13):** To a solution of compound **10** (106 mg, 0.07 mmol) in *tert*-butylmethylether (7.5 mL) was added *n*-BuOH (0.3 mL) and supported lipozyme® from *Mucor miehei* (1:1 w/w, 106 mg). The resulting mixture was stirred at 45 °C for 6 days, supported enzyme was filtrated and rinsed several times with EtOAc and Et<sub>2</sub>O. The filtrate was evaporated under reduced pressure. Purification of the residue was performed by silica column chromatography using CH<sub>2</sub>Cl<sub>2</sub>/MeOH (95:5 v/v) as eluent to give compound **13** (20 mg, 54%) as yellow solid. *R<sub>f</sub>* (pentane/EtOAc, 50:50) = 0.25. Mp 193.8 °C. <sup>1</sup>H NMR (500 MHz, MeOD) δ 7.33 (d, *J* = 2.2 Hz, 1H, H2'), 7.28 (dd, *J* = 8.4, 2.2 Hz, 1H, H6'), 6.89 (d, *J* = 8.4 Hz, 1H, H5'), 6.43 (d, *J* = 2.1 Hz, 1H, H8), 6.24 (d, *J* = 2.1 Hz, 1H, H6), 5.41 – 5.27 (m, 4H, 2 × CH=CH), 2.77 (t, *J* = 6.5 Hz, 2H, H11"), 2.63 (t, *J* = 7.3 Hz, 2H, H2"), 2.12 – 2.00 (m, 4H, H8", H14"), 1.70 (qt, *J* = 7.3 Hz, 2H, H3"), 1.43 – 1.24 (m, 14H, H4", H5", H6", H7", H15", H16", H17"), 0.89 (t, *J* = 6.8 Hz, 3H, H18"). <sup>13</sup>C NMR (125 MHz, MeOD) δ 177.22, 172.55, 166.30, 163.13, 158.68, 158.45, 150.37, 146.64, 131.43, 130.91, 130.90, 129.07, 129.06, 122.13, 121.97, 116.45, 116.18, 105.27, 100.14, 95.03, 34.61, 32.65, 30.63, 30.48, 30.19, 30.13, 29.98, 28.15, 28.12, 26.53, 25.80, 23.63, 14.42. HRMS (ESI-I): calculated for C<sub>33</sub>H<sub>39</sub>O<sub>8</sub> [M-H]<sup>-</sup> 563.2645; found 563.2654.

**(9Z,12Z,15Z)-2-(3,4-dihydroxyphenyl)-5,7-dihydroxy-4-oxo-4H-chromen-3-yl octadeca-9,12,15-trienoate (Quer-3-ALA, 14):** To a solution of compound **11** (46 mg, 29  $\mu$ mol) in *tert*-butylmethylether (3.11 mL) was added *n*-BuOH (0.13 mL) and supported lipozyme® from *Mucor miehei* (1:1 w/w, 46 mg). The resulting mixture was stirred at 45 °C for 8 days, supported enzyme was filtrated and rinsed several times with EtOAc and Et<sub>2</sub>O. The filtrate was evaporated under reduced pressure. Purification of the residue was performed by silica column chromatography using CH<sub>2</sub>Cl<sub>2</sub>/MeOH (95:5 v/v) as eluent to give compound **14** (16 mg, 96%) as yellow solid. *R*<sub>f</sub> (CH<sub>2</sub>Cl<sub>2</sub>/MeOH, 95:5) = 0.25. Mp 180.0 °C. <sup>1</sup>H NMR (500 MHz, MeOD)  $\delta$  7.33 (d, *J* = 2.1 Hz, 1H, H2'), 7.28 (dd, *J* = 8.4, 2.1 Hz, 1H, H6'), 6.89 (d, *J* = 8.4 Hz, 1H, H5'), 6.43 (d, *J* = 1.9 Hz, 1H, H8), 6.23 (d, *J* = 1.9 Hz, 1H, H6), 5.42 – 5.18 (m, 6H, 3  $\times$  CH=CH), 2.85 – 2.75 (m, 4H, H11'', H14''), 2.63 (t, *J* = 7.1 Hz, 2H, H2''), 2.12 – 2.02 (m, 4H, H8'', H17''), 1.70 (qt, *J* = 7.1 Hz, 2H, H3''), 1.41 – 1.26 (m, 8H, H4'', H5'', H6'', H7''), 0.95 (t, *J* = 7.5 Hz, 3H, H18''). <sup>13</sup>C NMR (125 MHz, MeOD)  $\delta$  177.21, 172.56, 166.26, 163.12, 158.67, 158.42, 150.35, 146.63, 132.71, 131.45, 131.13, 129.23, 129.17, 128.82, 128.23, 122.16, 121.99, 116.46, 116.20, 105.30, 100.14, 95.05, 34.63, 30.63, 30.20, 30.14, 30.00, 28.14, 26.52, 26.40, 25.81, 21.48, 14.66. HRMS (ESI-I): calculated for C<sub>33</sub>H<sub>37</sub>O<sub>8</sub> [M-H]<sup>-</sup> 561.2488; found 561.2491.

**(4Z,7Z,10Z,13Z,16Z,19Z)-2-(3,4-dihydroxyphenyl)-5,7-dihydroxy-4-oxo-4H-chromen-3-yl docosa-4,7,10,13,16,19-hexaenoate (Quer-3-DHA, 15):** To a solution of compound **12** (39 mg, 21  $\mu$ mol) in *tert*-butylmethylether (2.7 mL) was added *n*-BuOH (0.1 mL) and supported lipozyme® from *Mucor miehei* (1:1 w/w, 39 mg). The resulting mixture was stirred at 45 °C for 8 days, supported enzyme was filtrated and rinsed several times with EtOAc and Et<sub>2</sub>O. The filtrate was evaporated under reduced pressure. Purification of the residue was performed by silica column chromatography using CH<sub>2</sub>Cl<sub>2</sub>/MeOH (97:3 v/v) as eluent to give compound **15** (8 mg, 62%) as sticky yellow solid. *R*<sub>f</sub> (CH<sub>2</sub>Cl<sub>2</sub>/MeOH, 95:5) = 0.20. Mp 191.3 °C. <sup>1</sup>H NMR (300 MHz, MeOD)  $\delta$  7.34 (d, *J* = 2.2 Hz, 1H, H2'), 7.28 (dd, *J* = 8.4, 2.2 Hz, 1H, H6'), 6.89 (d, *J* = 8.4 Hz, 1H, H5'), 6.43 (d, *J* = 2.1 Hz, 1H, H8), 6.24 (d, *J* = 2.1 Hz, 1H, H6), 5.51 – 5.16 (m, 12H, 6  $\times$  CH=CH), 2.89 – 2.74 (m, 10H, H6'', H9'', H12'', H15'', H18''), 2.70 (t, *J* = 7.3 Hz, 2H, H2''), 2.48 (q, *J* = 7.3 Hz, 2H, H3''), 2.04 (qt, *J* = 7.5 Hz, 2H, H21''), 0.94 (t, *J* = 7.5 Hz, 3H, H22''). <sup>13</sup>C NMR (75 MHz, MeOD)  $\delta$  177.15, 171.95, 166.27, 163.13, 158.67, 158.38, 150.38, 146.67, 132.73, 131.46, 130.61 (2C), 129.38 (3C), 129.12 (2C), 129.06, 128.89, 128.68, 128.18, 122.19, 121.96, 116.47, 116.20, 105.30, 100.14, 95.04, 34.68, 26.55 (4C), 26.39, 23.67, 21.46, 14.65. HRMS (ESI-I): calculated for C<sub>37</sub>H<sub>39</sub>O<sub>8</sub> [M-H]<sup>-</sup> 611.2645; found 611.2651.

**3-(*tert*-butyldimethylsilyloxy)-2-(3,4-bis-(*tert*-butyldimethylsilyloxy)phenyl)-5,7-dihydroxy-4H-chromen-4-one (16):** To a solution of dried quercetin (0.5 g, 1.65 mmol) in anhydrous CH<sub>2</sub>Cl<sub>2</sub> (5 mL) stirred under N<sub>2</sub>, was added distilled DBU (0.87 mL, 5.79 mmol) and TBDMSCI (0.77 g, 5.13 mmol). The resulting mixture was stirred at room temperature for 45 min, diluted in CH<sub>2</sub>Cl<sub>2</sub> and washed several times with water. The organic layer was dried over MgSO<sub>4</sub>, filtered and evaporated under reduced pressure. Purification of the residue was performed by silica column chromatography using CH<sub>2</sub>Cl<sub>2</sub> as eluent to give compound **16** (240 mg, 22%) as yellow oil, isolated among penta- and tetra-derivatives. *R*<sub>f</sub> (CH<sub>2</sub>Cl<sub>2</sub>/MeOH, 99:1) = 0.37. <sup>1</sup>H NMR (500 MHz, CDCl<sub>3</sub>)  $\delta$  7.45 (dd, *J* = 8.5, 2.5 Hz, 1H, H6'), 7.33 (d, *J* = 2.5 Hz, 1H, H2'), 6.89 (d, *J* = 8.5 Hz, 1H, H5'), 6.35 (d, *J* = 2.0 Hz, 1H, H8), 6.26 (d, *J* = 2.0 Hz, 1H, H6), 1.81 (bs, 1H, OH), 1.00 (s, 9H, 3  $\times$  CH<sub>3</sub>*t*Bu), 0.99 (s, 9H, 3  $\times$  CH<sub>3</sub>*t*Bu), 0.83 (s, 9H, 3  $\times$  CH<sub>3</sub>*t*Bu), 0.23 (s, 6H, 2  $\times$  CH<sub>3</sub>Si), 0.20 (s, 6H, 2  $\times$  CH<sub>3</sub>Si), 0.11 (s, 6H, 2  $\times$  CH<sub>3</sub>Si). <sup>13</sup>C NMR (125 MHz, CDCl<sub>3</sub>)  $\delta$  178.18, 162.03, 161.64, 156.68, 153.39, 149.24, 146.74, 135.49, 124.26, 123.28, 121.60, 120.76, 105.53, 98.53, 93.68, 25.89 (3C), 25.87 (3C), 25.64 (3C), 18.55, 18.53, 18.41, -4.09 (2C), -4.17 (2C), -4.20 (2C). HRMS (ESI-I): calculated for C<sub>33</sub>H<sub>51</sub>O<sub>7</sub>Si<sub>3</sub> [M-H]<sup>-</sup> 643.2943; found 643.2949.

**(9Z,12Z,15Z)-3-(*tert*-butyldimethylsilyloxy)-2-(3,4-bis-(*tert*-butyldimethylsilyloxy)phenyl)-5-hydroxy-4-oxo-4H-chromen-7-yl octadeca-9,12,15-trienoate (17):** To a solution of  $\alpha$ -linolenic acid (94 mg, 0.34 mmol), dicyclohexylcarbodiimide (77 mg, 0.37 mmol) and 4-dimethylaminopyridine (21 mg, 0.173 mmol) in anhydrous CH<sub>2</sub>Cl<sub>2</sub> (5 mL) stirred under N<sub>2</sub>, was added a solution of compound **16** (218 mg, 0.34 mmol) in anhydrous CH<sub>2</sub>Cl<sub>2</sub> (4 mL). The resulting mixture was stirred at room temperature

for 1 h and cooled to 4 °C for 1 h to afford filtration of the precipitate. The filtrate was washed with water and brine, dried over MgSO<sub>4</sub>, filtered and evaporated under reduced pressure. Purification of the residue was performed by silica column chromatography using pentane/EtOAc (99:1 v/v) as eluent to give compound **17** (126 mg, 41%) as yellow oil. *R*<sub>f</sub> (pentane/EtOAc, 90:10) = 0.67. <sup>1</sup>H NMR (500 MHz, CDCl<sub>3</sub>) δ 7.45 (dd, *J* = 8.4, 2.2 Hz, 1H, H6'), 7.34 (d, *J* = 2.2 Hz, 1H, H2'), 6.90 (d, *J* = 8.4 Hz, 1H, H5'), 6.69 (d, *J* = 2.0 Hz, 1H, H8), 6.49 (d, *J* = 2.0 Hz, 1H, H6), 5.46 – 5.26 (m, 6H, 3 × CH=CH), 2.81 (t, *J* = 5.9 Hz, 4H, H11'', H14''), 2.58 (t, *J* = 7.5 Hz, 2H, H2''), 2.12 – 2.03 (m, 4H, H8'', H17''), 1.76 (qt, *J* = 7.5 Hz, 2H, H3''), 1.45 – 1.31 (m, 8H, H4'', H5'', H6'', H7''), 1.00 (s, 9H, 3 × CH<sub>3</sub>tBu), 1.00 (s, 9H, 3 × CH<sub>3</sub>tBu), 0.97 (t, *J* = 7.5 Hz, 2H, H18''), 0.83 (s, 9H, 3 × CH<sub>3</sub>tBu), 0.23 (s, 6H, 2 × CH<sub>3</sub>Si), 0.20 (s, 6H, 2 × CH<sub>3</sub>Si), 0.11 (s, 6H, 2 × CH<sub>3</sub>Si). <sup>13</sup>C NMR (125 MHz, CDCl<sub>3</sub>) δ 178.49, 171.46, 161.66, 155.52, 155.50, 154.23, 149.54, 146.82, 135.98, 131.95, 130.20, 128.28, 128.22, 127.77, 127.08, 123.99, 123.37, 121.75, 120.83, 108.84, 104.28, 100.66, 34.38, 29.55, 29.13, 29.07, 29.01, 27.17, 25.91 (3C), 25.88 (3C), 25.62 (3C), 25.60, 25.51, 24.79, 20.54, 18.58, 18.56, 18.41, 14.28, -4.06 (2C), -4.16 (2C), -4.17 (2C). HRMS (ASAP+I): calculated for C<sub>32</sub>H<sub>43</sub>O<sub>4</sub> [M + H]<sup>+</sup> 905.5239; found 905.5228.

**(9Z,12Z,15Z)-2-(3,4-dihydroxyphenyl)-3,5-dihydroxy-4-oxo-4H-chromen-7-yl octadeca-9,12,15-trienoate (Quer-7-ALA, 18):** To a solution of compound **17** (115 mg, 0.13 mmol) in anhydrous THF (9.5 mL) stirred under N<sub>2</sub>, was added dropwise triethylamine trihydrofluoride (186 μL, 1.14 mmol). The resulting mixture was stirred at room temperature for 35 min, diluted in EtOAc and washed with water and brine. The organic layer was dried over MgSO<sub>4</sub>, filtered and evaporated under reduced pressure. Purification of the residue was performed by silica column chromatography using pentane/EtOAc (90:10 to 80:20 v/v) as eluent to give compound **18** (30 mg, 61%) as bright yellow solid. *R*<sub>f</sub> (pentane/EtOAc, 50:50) = 0.61. Mp 235.8 °C. <sup>1</sup>H NMR (500 MHz, MeOD) δ 7.77 (d, *J* = 2.0 Hz, 1H, H2'), 7.66 (dd, *J* = 8.5, 2.0 Hz, 1H, H6'), 6.88 (d, *J* = 8.5 Hz, 1H, H5'), 6.81 (d, *J* = 1.9 Hz, 1H, H8), 6.46 (d, *J* = 1.9 Hz, 1H, H6), 5.45 – 5.21 (m, 6H, 3 × CH=CH), 2.85 – 2.73 (m, 4H, H11'', H14''), 2.58 (t, *J* = 7.4 Hz, 2H, H2''), 2.13 – 2.01 (m, 4H, H8'', H17''), 1.72 (qt, *J* = 7.4 Hz, 2H, H3''), 1.48 – 1.30 (m, 8H, H4'', H5'', H6'', H7''), 0.96 (t, *J* = 7.5 Hz, 3H, H18''). <sup>13</sup>C NMR (125 MHz, MeOD) δ 177.63, 172.84, 161.97, 157.20, 156.76, 149.32, 149.21, 146.26, 138.03, 132.71, 131.05, 129.20, 129.18, 128.90, 128.23, 123.71, 122.01, 116.26, 116.23, 108.50, 104.83, 101.87, 35.02, 30.66, 30.23, 30.16, 30.09, 28.14, 26.52, 26.40, 25.80, 21.48, 14.67. HRMS (ESI-I): calculated for C<sub>33</sub>H<sub>37</sub>O<sub>8</sub> [M-H]<sup>-</sup> 561.2488; found 561.2490.

**Figure S1** : Graphical representation of *in vitro* evaluations of lipophenols.

TOX = cytotoxicity assays represented in cell survival (%) depending on derivative concentration ( $\mu\text{M}$ ). Results are normalized with non-treated control cells as 100% survival (red line).

ROS = Inhibition of ROS assays represented in ROS production (%) depending on derivative concentration ( $\mu\text{M}$ ). Results are normalized with non-treated control cells exposed to stressor as 100% of ROS production (red line).

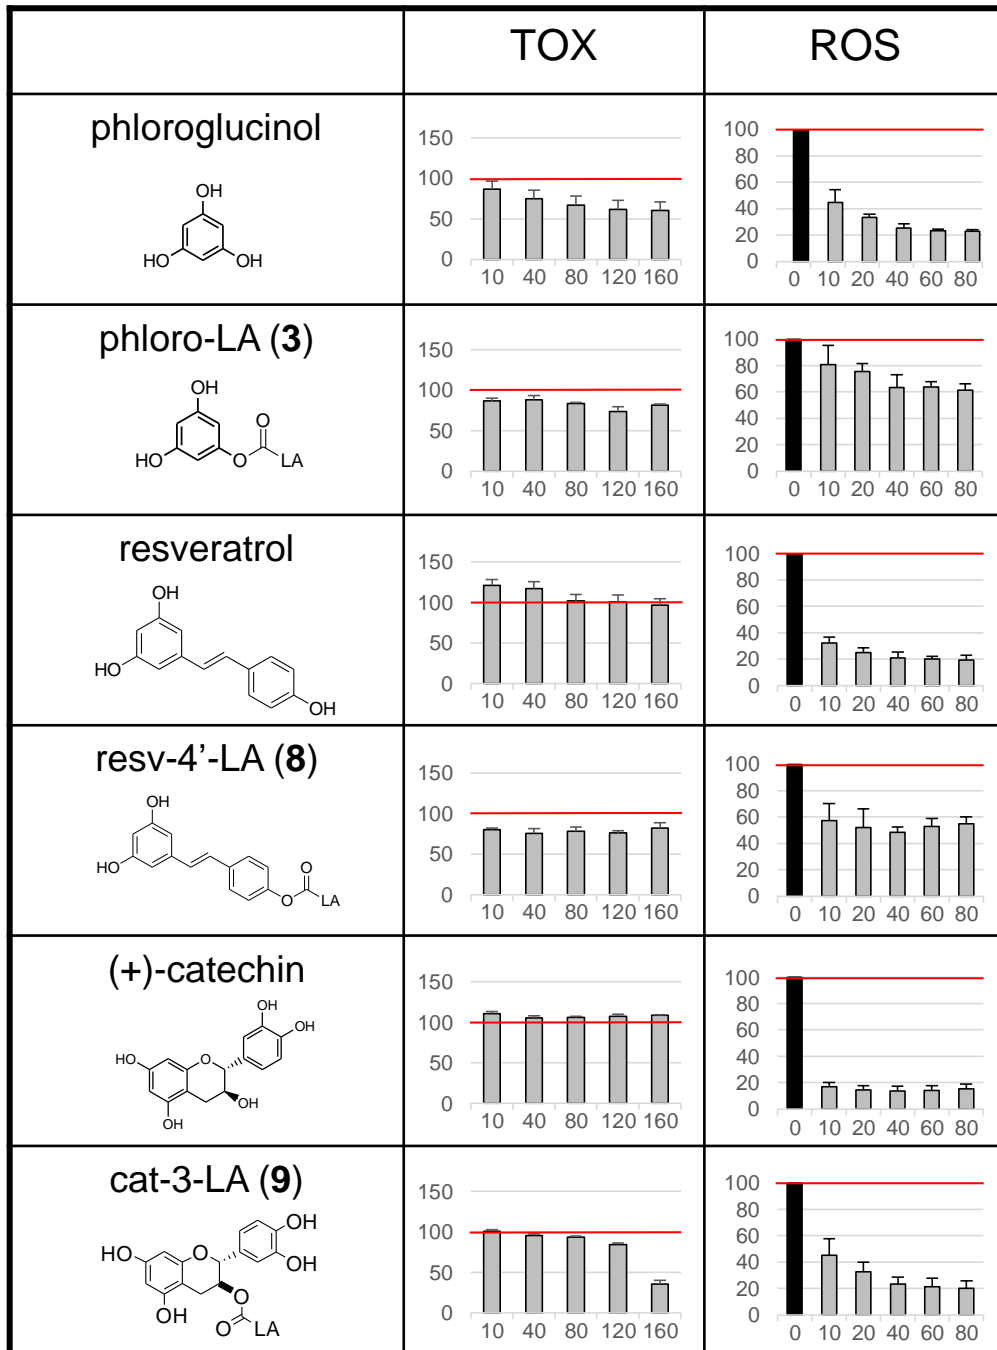



|                                                                                                                   | TOX                                                                                 | ROS                                                                                  |
|-------------------------------------------------------------------------------------------------------------------|-------------------------------------------------------------------------------------|--------------------------------------------------------------------------------------|
| <p><b>quercetin</b></p> 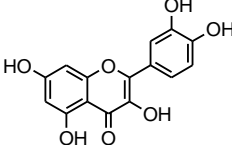         |    |    |
| <p><b>quer-3-LA (13)</b></p>     |    |    |
| <p><b>quer-3-DHA (15)</b></p>    |    |    |
| <p><b>quer-3-ALA (14)</b></p>  |  |  |
| <p><b>quer-7-ALA (18)</b></p>  |  |  |

**Figure S2: Full NMR spectra characterization of derivatives from 2 to 18 ( $^1\text{H}$  and  $^{13}\text{C}$ ).**

6.287  
6.282  
6.278  
6.246  
6.241  
5.411  
5.405  
5.398  
5.391  
5.383  
5.376  
5.369  
5.361  
5.357  
5.347  
5.341  
5.333  
5.326  
5.319  
5.311  
5.305  
5.298

2.790  
2.776  
2.763  
2.516  
2.501  
2.486  
2.073  
2.065  
2.059  
2.051  
2.045  
2.039  
2.030  
1.757  
1.743  
1.728  
1.713  
1.698  
1.385  
1.377  
1.372  
1.363  
1.357  
1.352  
1.340  
1.332  
1.328  
1.319  
1.307  
1.300  
1.293  
1.286  
1.279  
1.262  
1.247  
1.232  
1.220  
1.216  
1.202  
1.094  
1.079  
0.902  
0.889  
0.875

Compound 2 <sup>1</sup>H NMR spectra in CDCl<sub>3</sub>

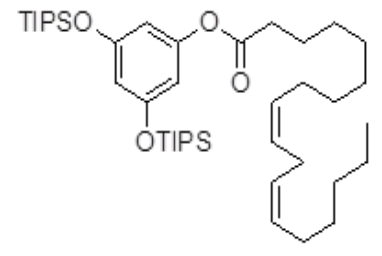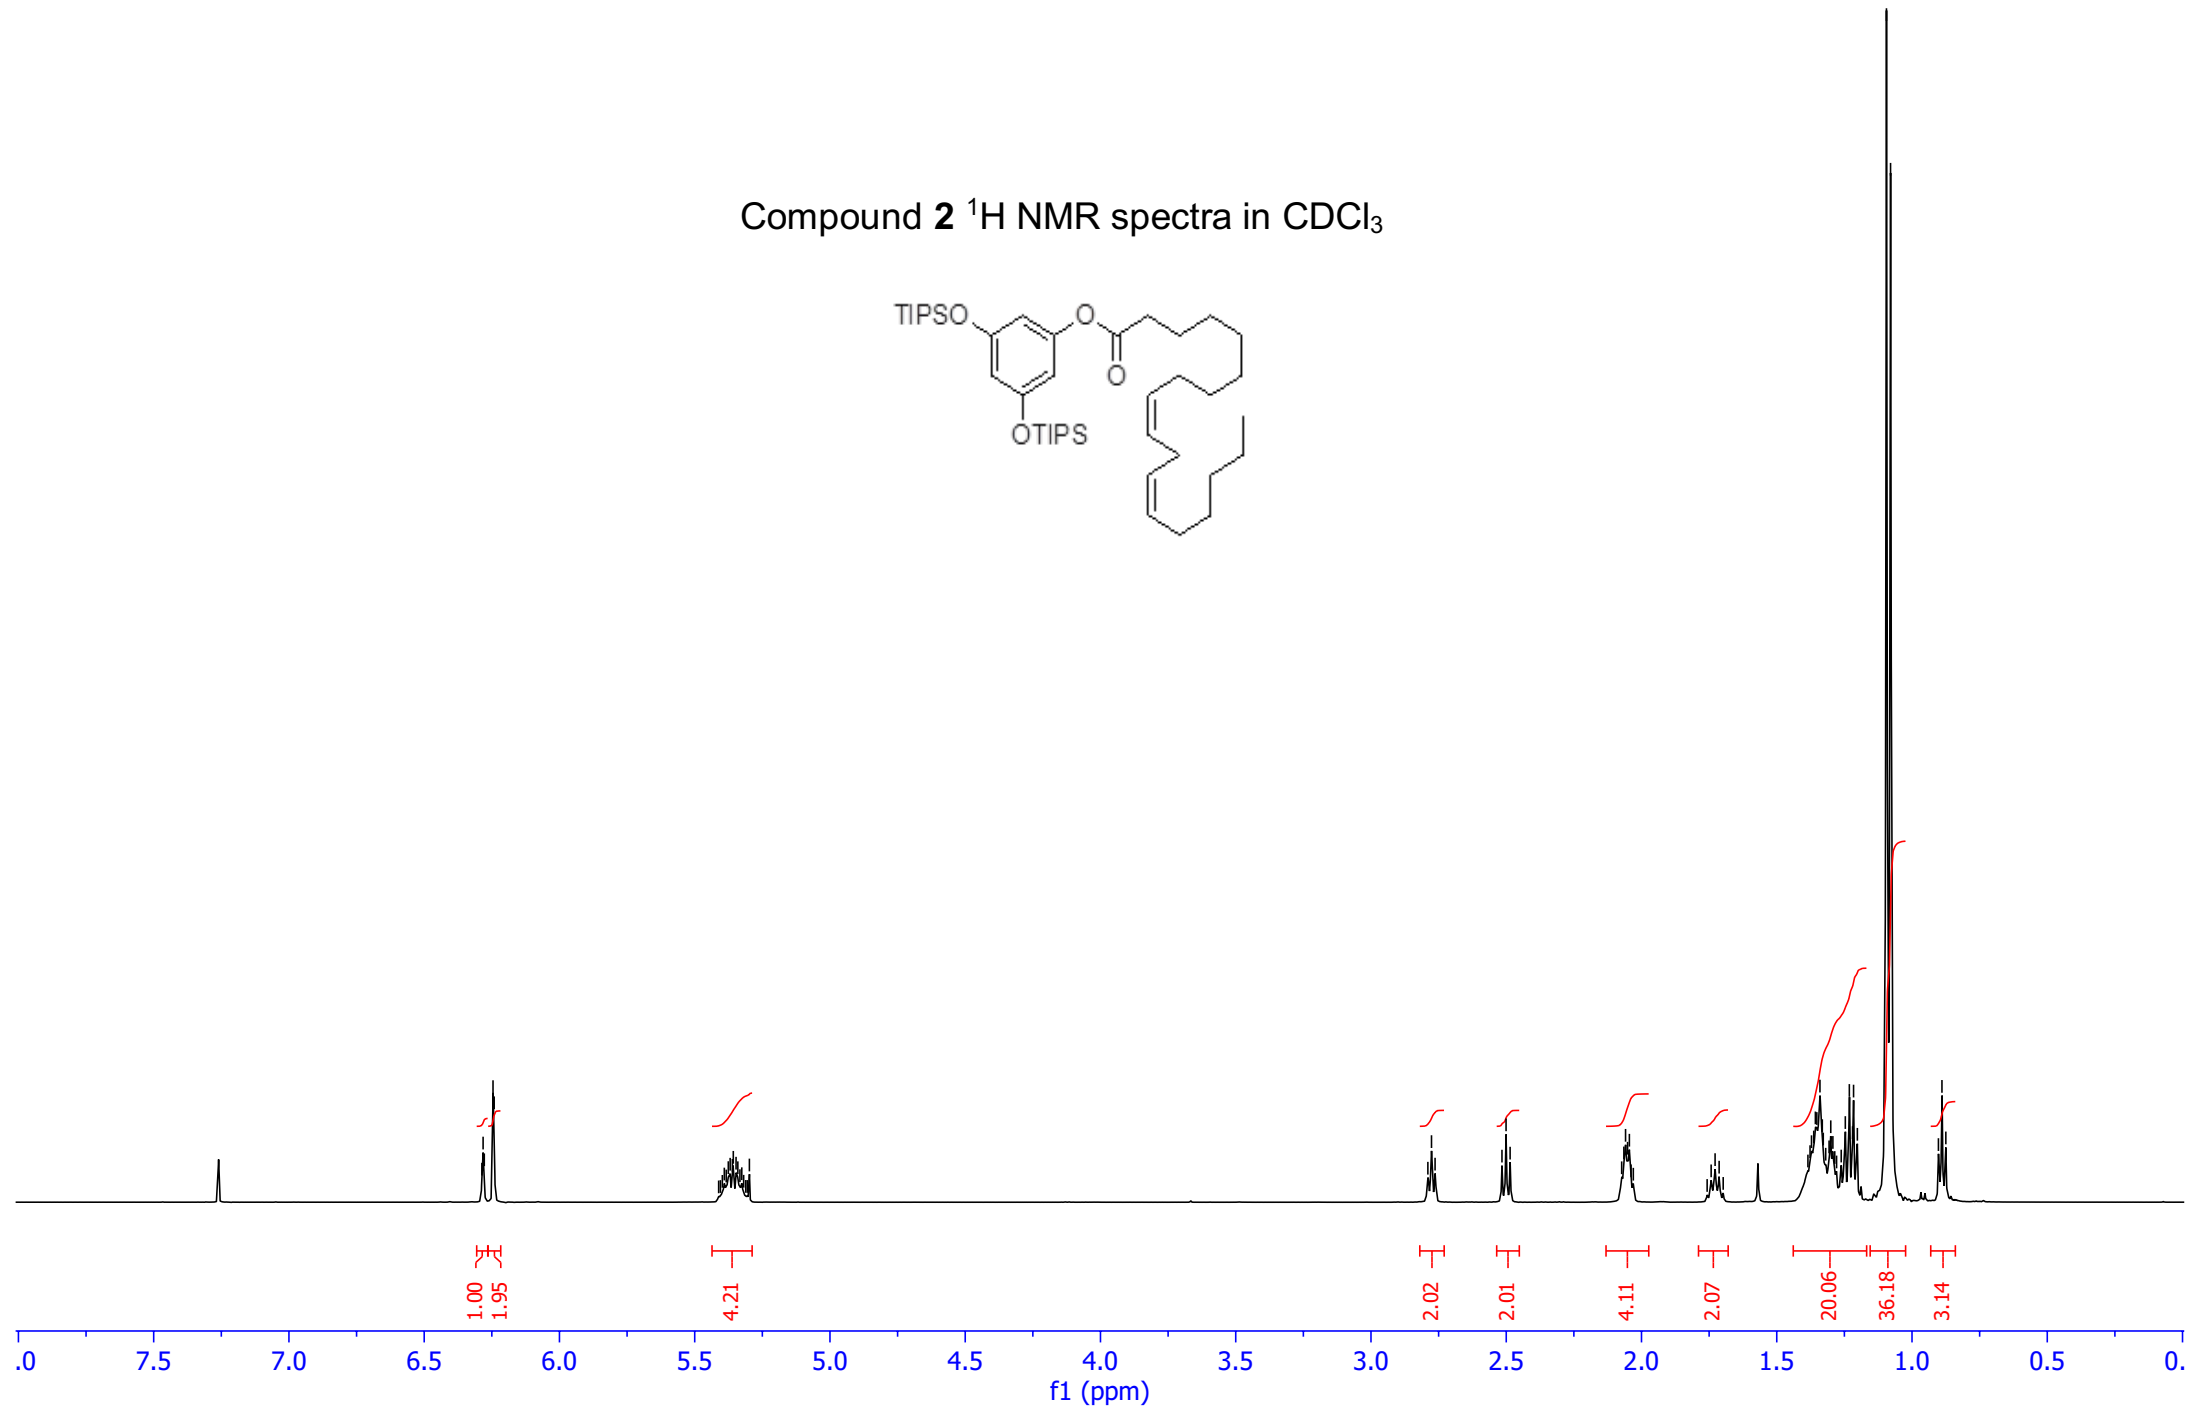





— 174.544

— 157.380

— 151.651

130.236

129.970

128.084

127.860

101.936

101.503

34.380

31.498

29.583

29.317

29.134

29.085

29.014

27.161

25.603

24.812

22.555

— 14.067

### Phloro-LA (compound 3) $^{13}\text{C}$ NMR spectra in $\text{CDCl}_3$

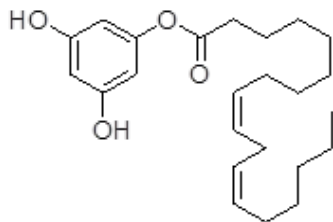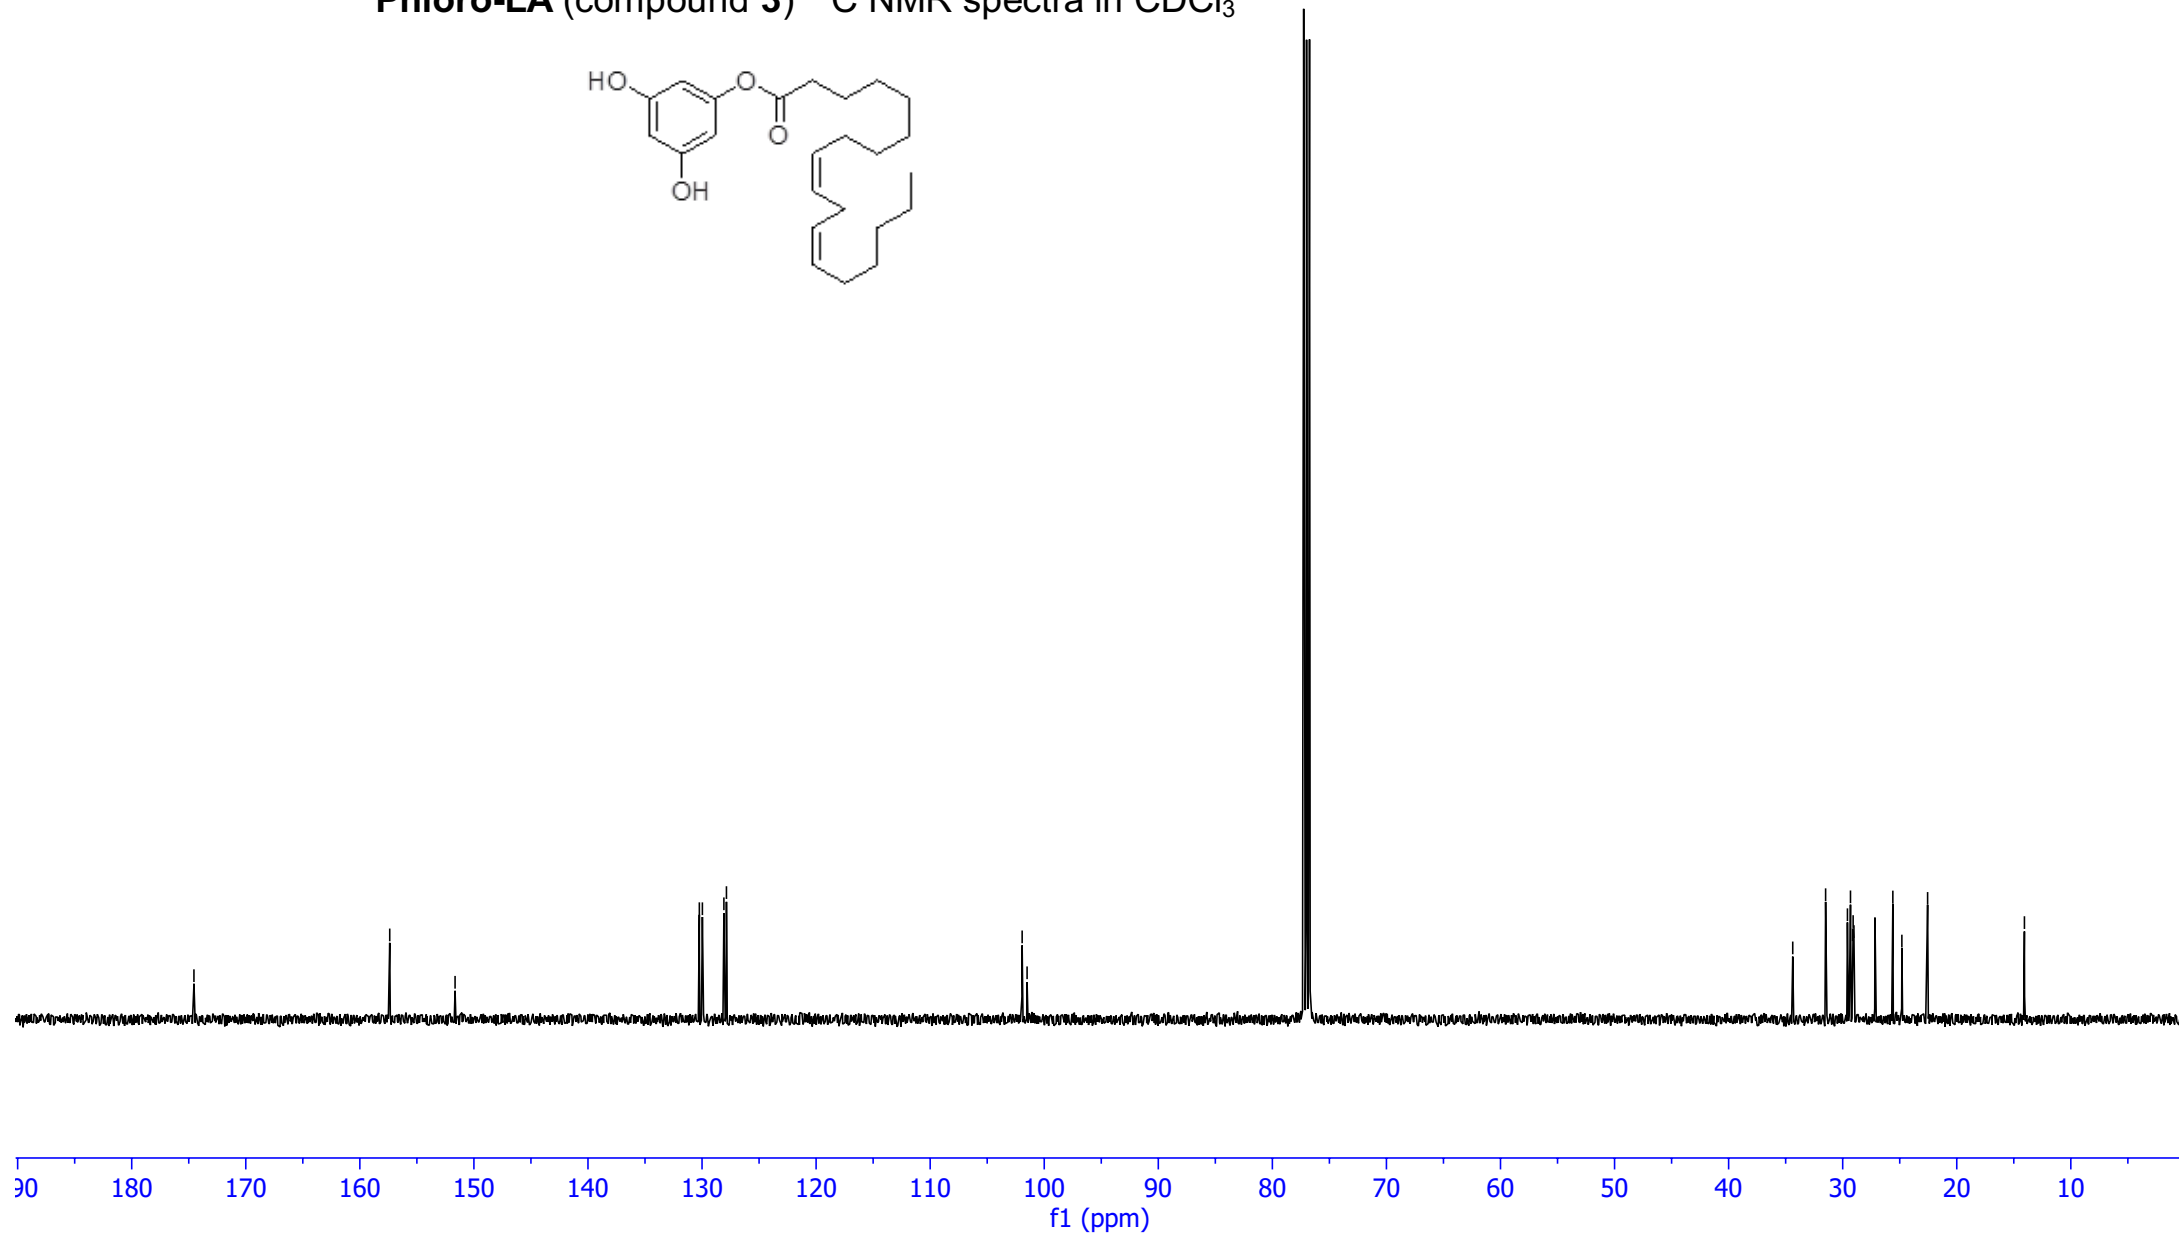

7.546  
7.531

7.085  
7.070  
7.029  
6.992  
6.959

6.495

6.206  
6.202

4.892

3.315  
3.314  
3.313

2.276  
2.275

Compound **4**  $^1\text{H}$  NMR spectra in  $\text{CD}_3\text{OD}$

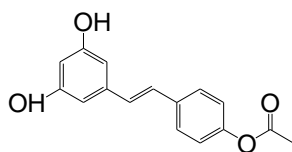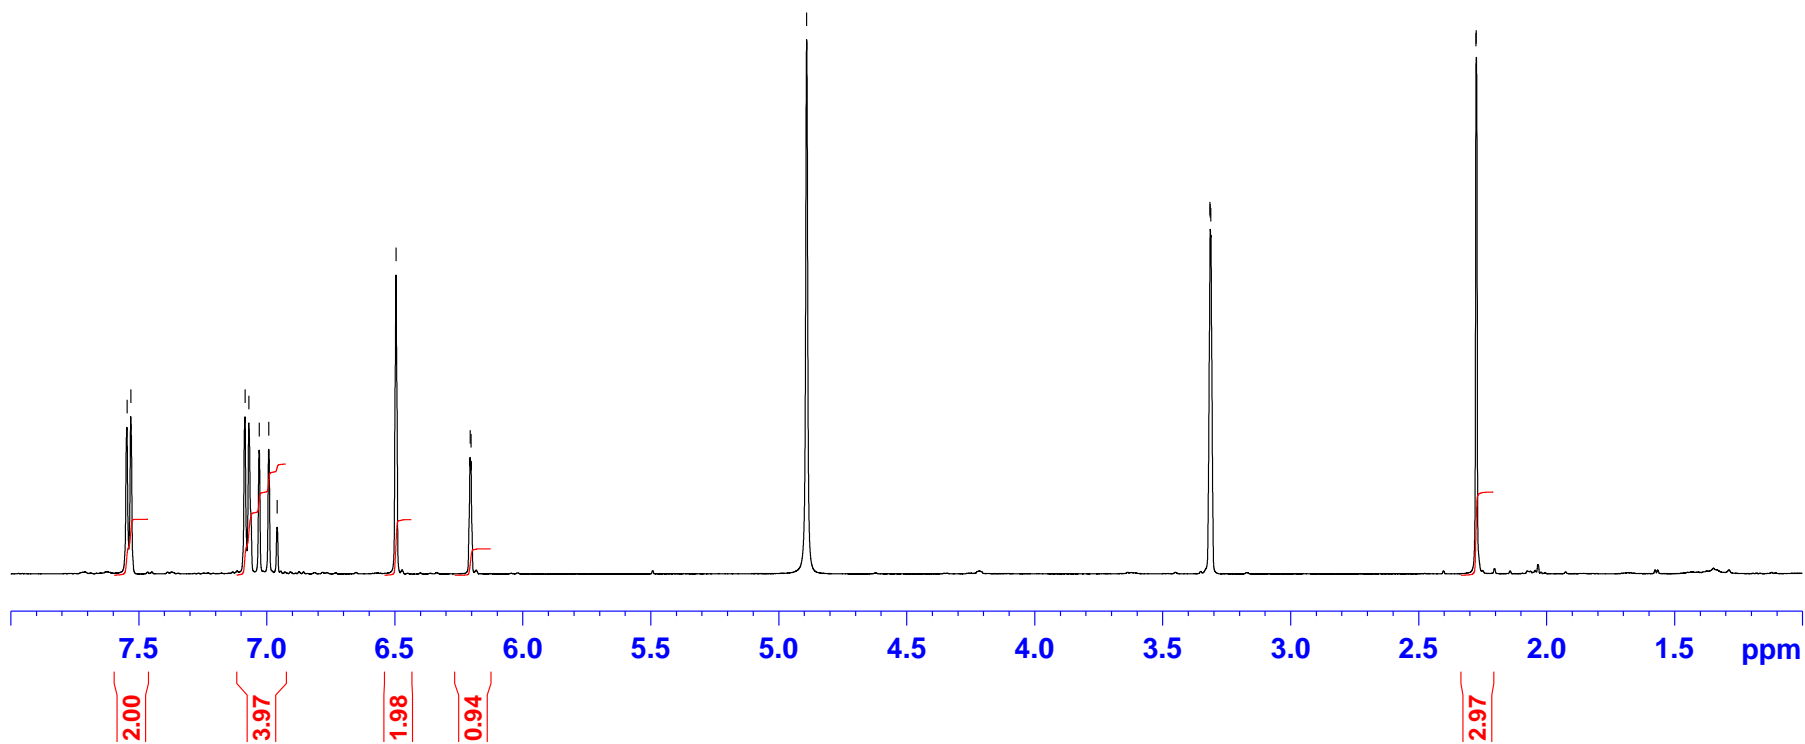

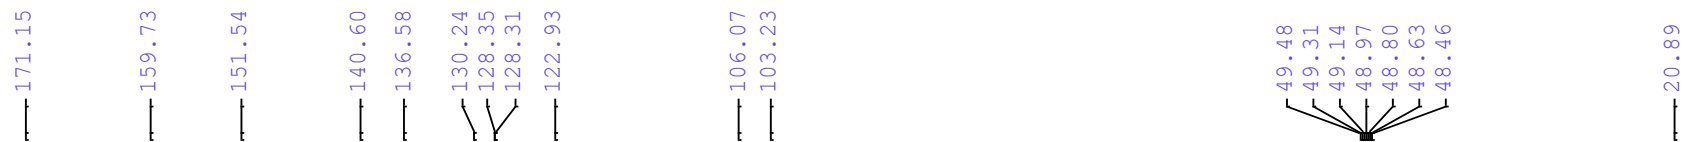

Compound **4**  $^{13}\text{C}$  Jmod NMR spectra in  $\text{CD}_3\text{OD}$

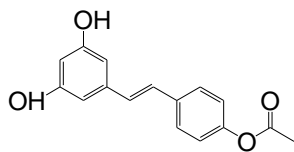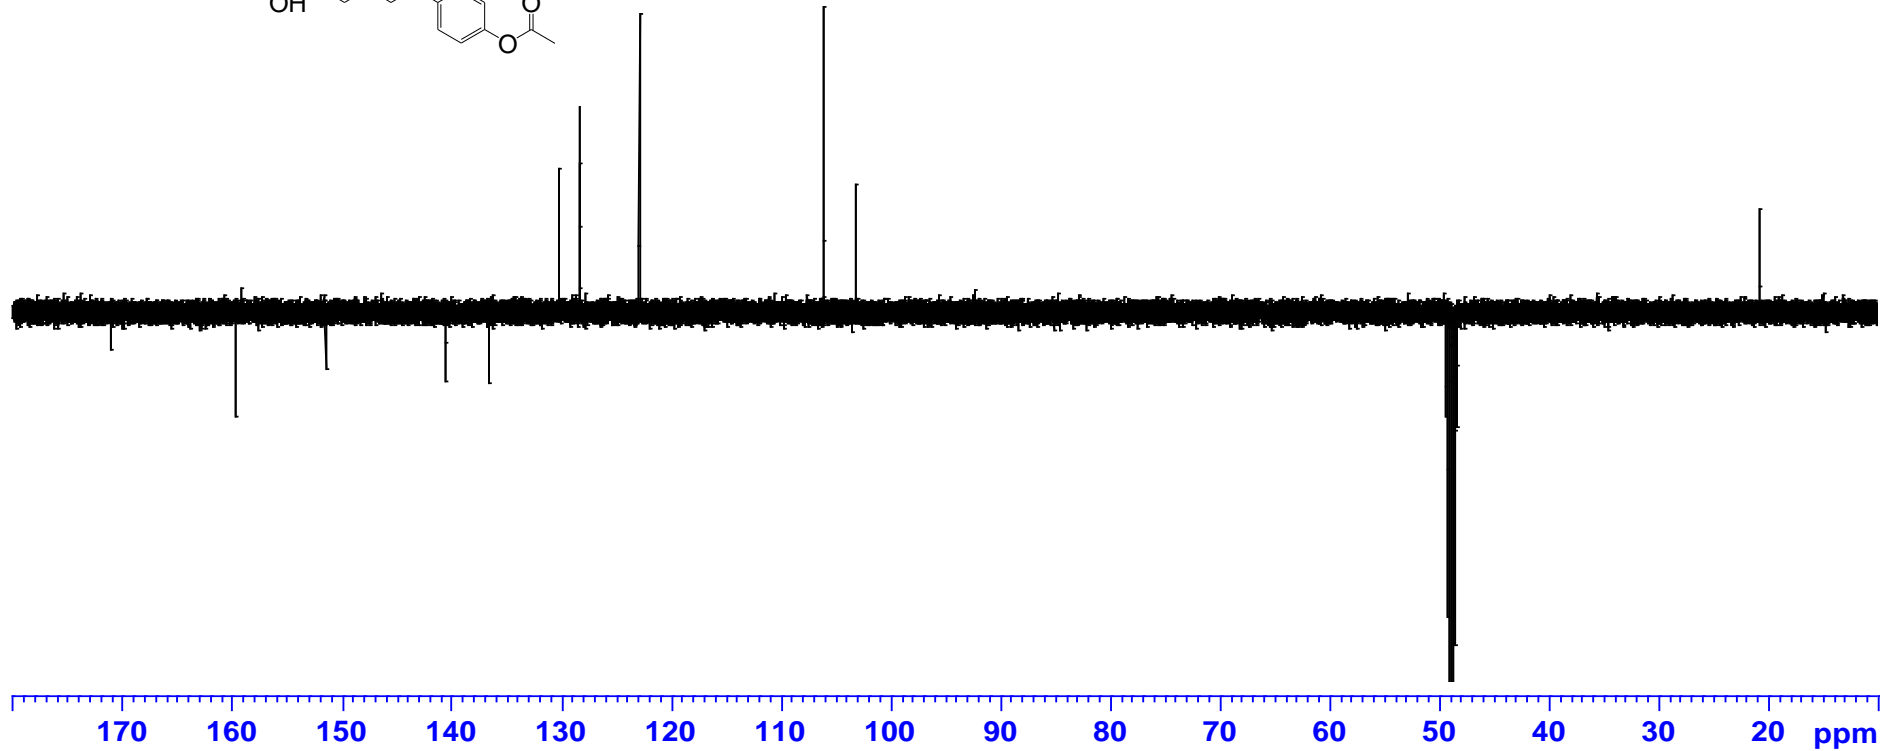



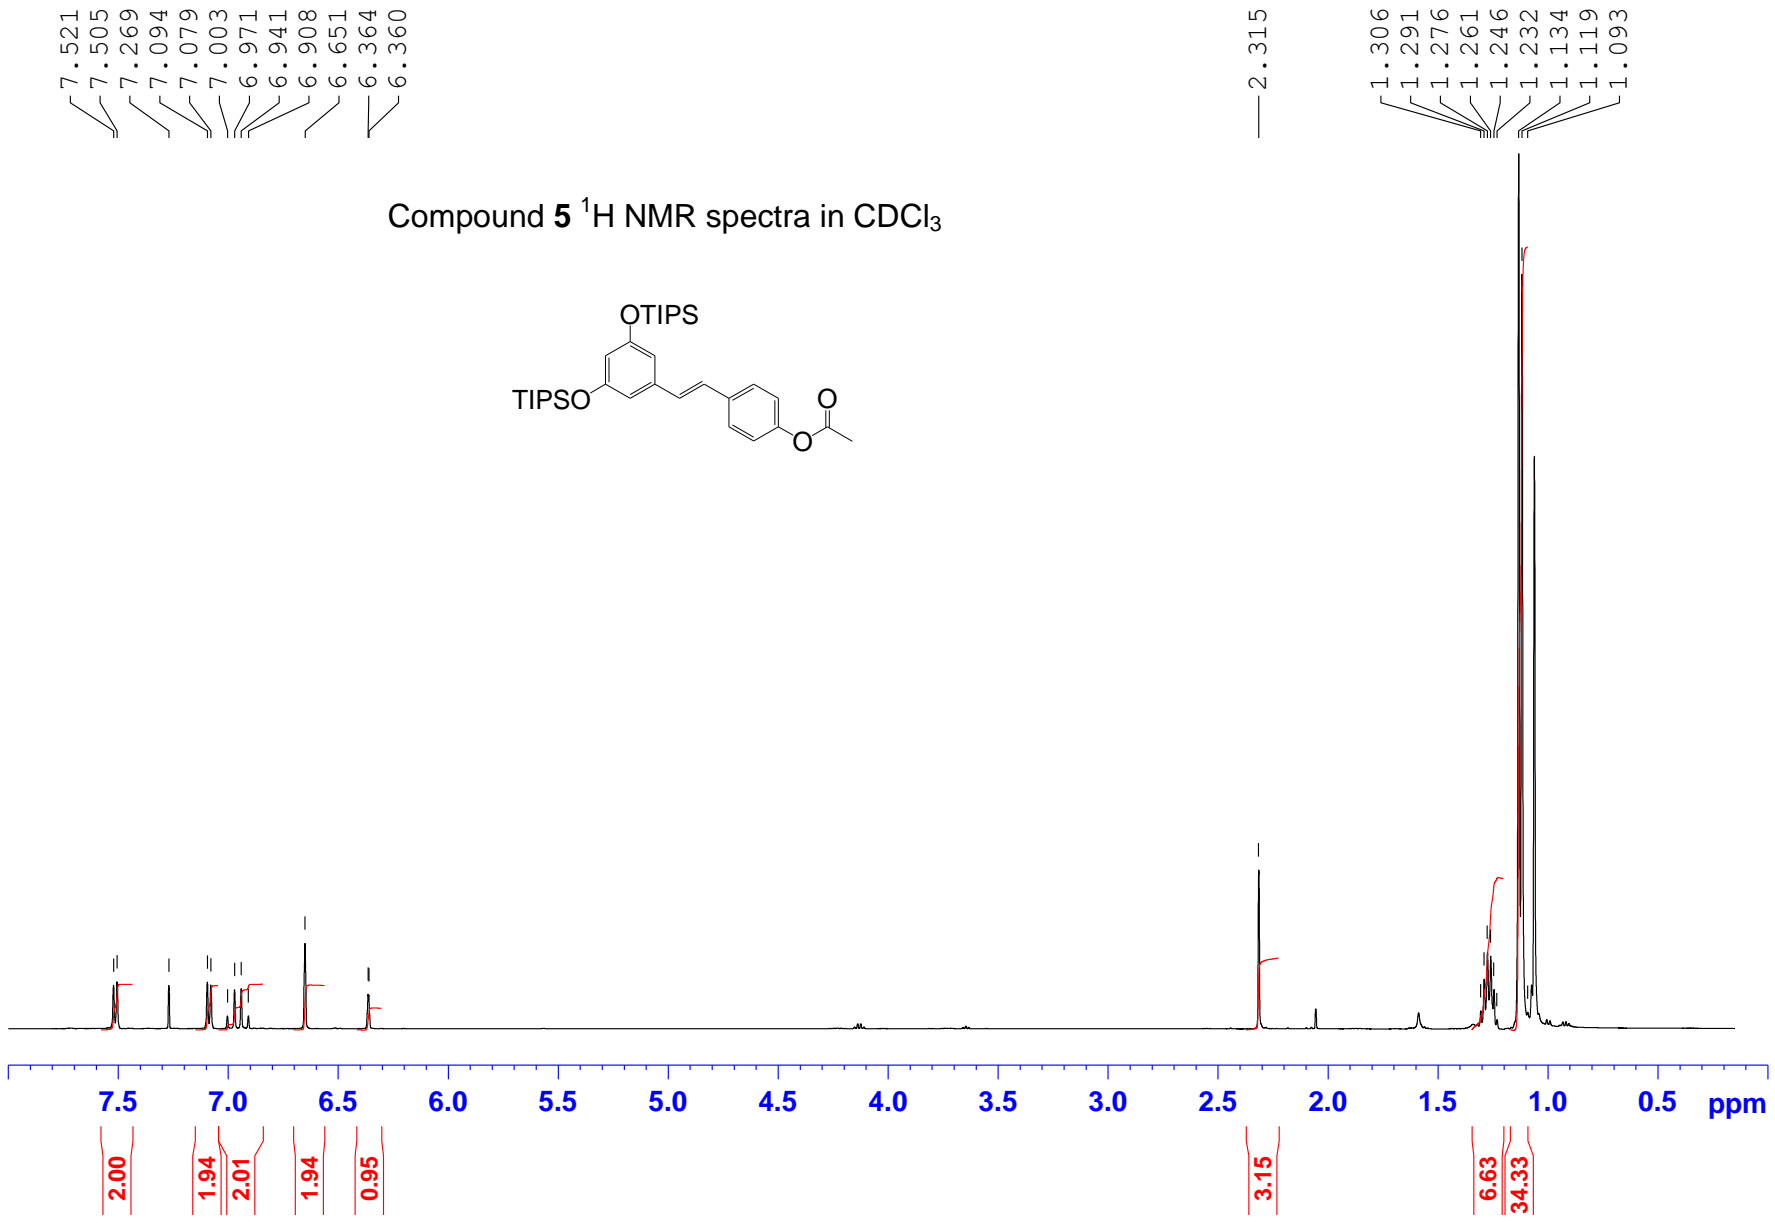

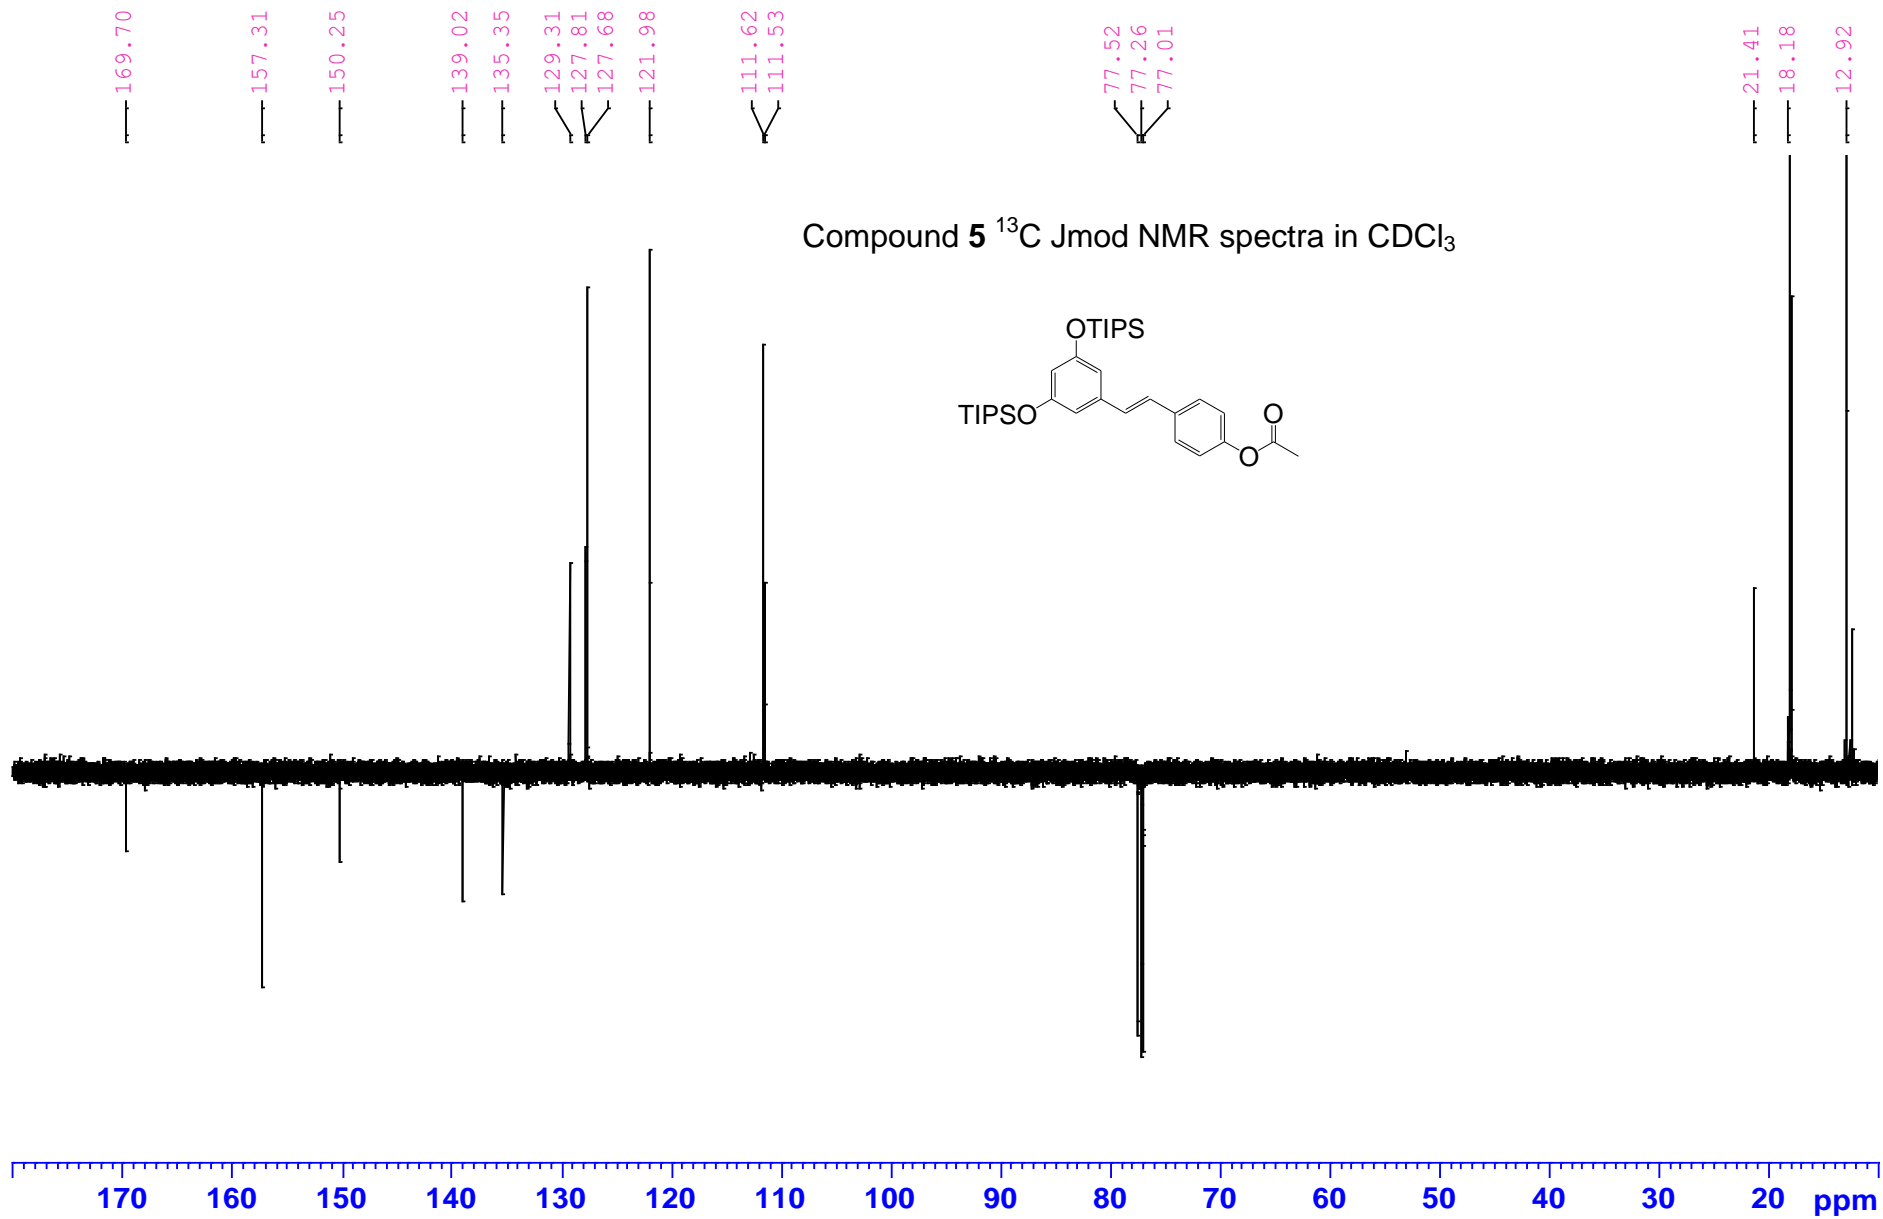

Compound **6**  $^1\text{H}$  NMR spectra in  $\text{CD}_3\text{OD}$

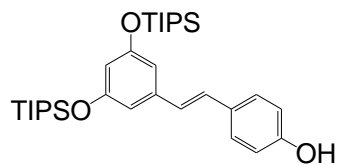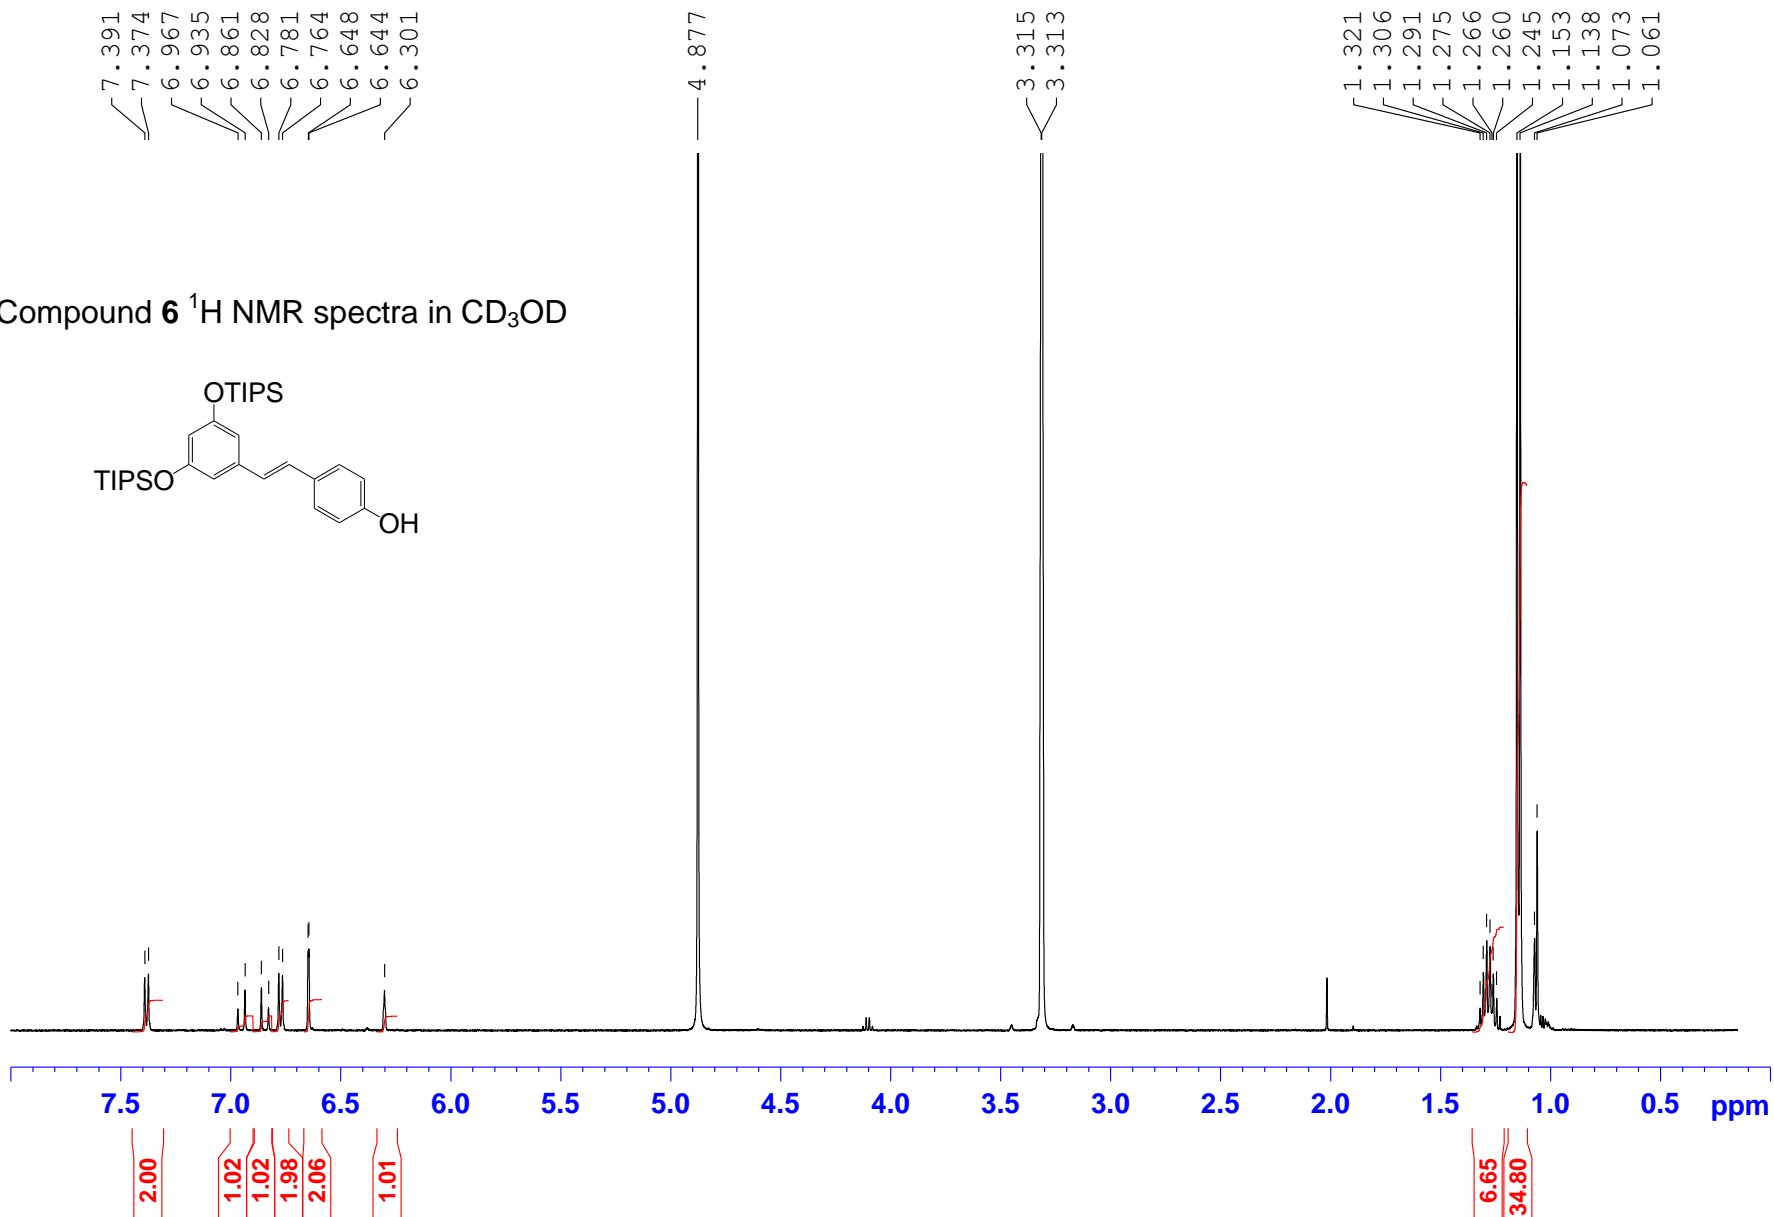

Compound **6**  $^{13}\text{C}$  Jmod NMR spectra in  $\text{CD}_3\text{OD}$

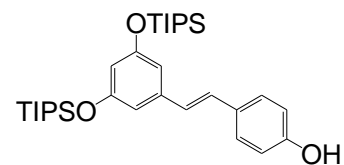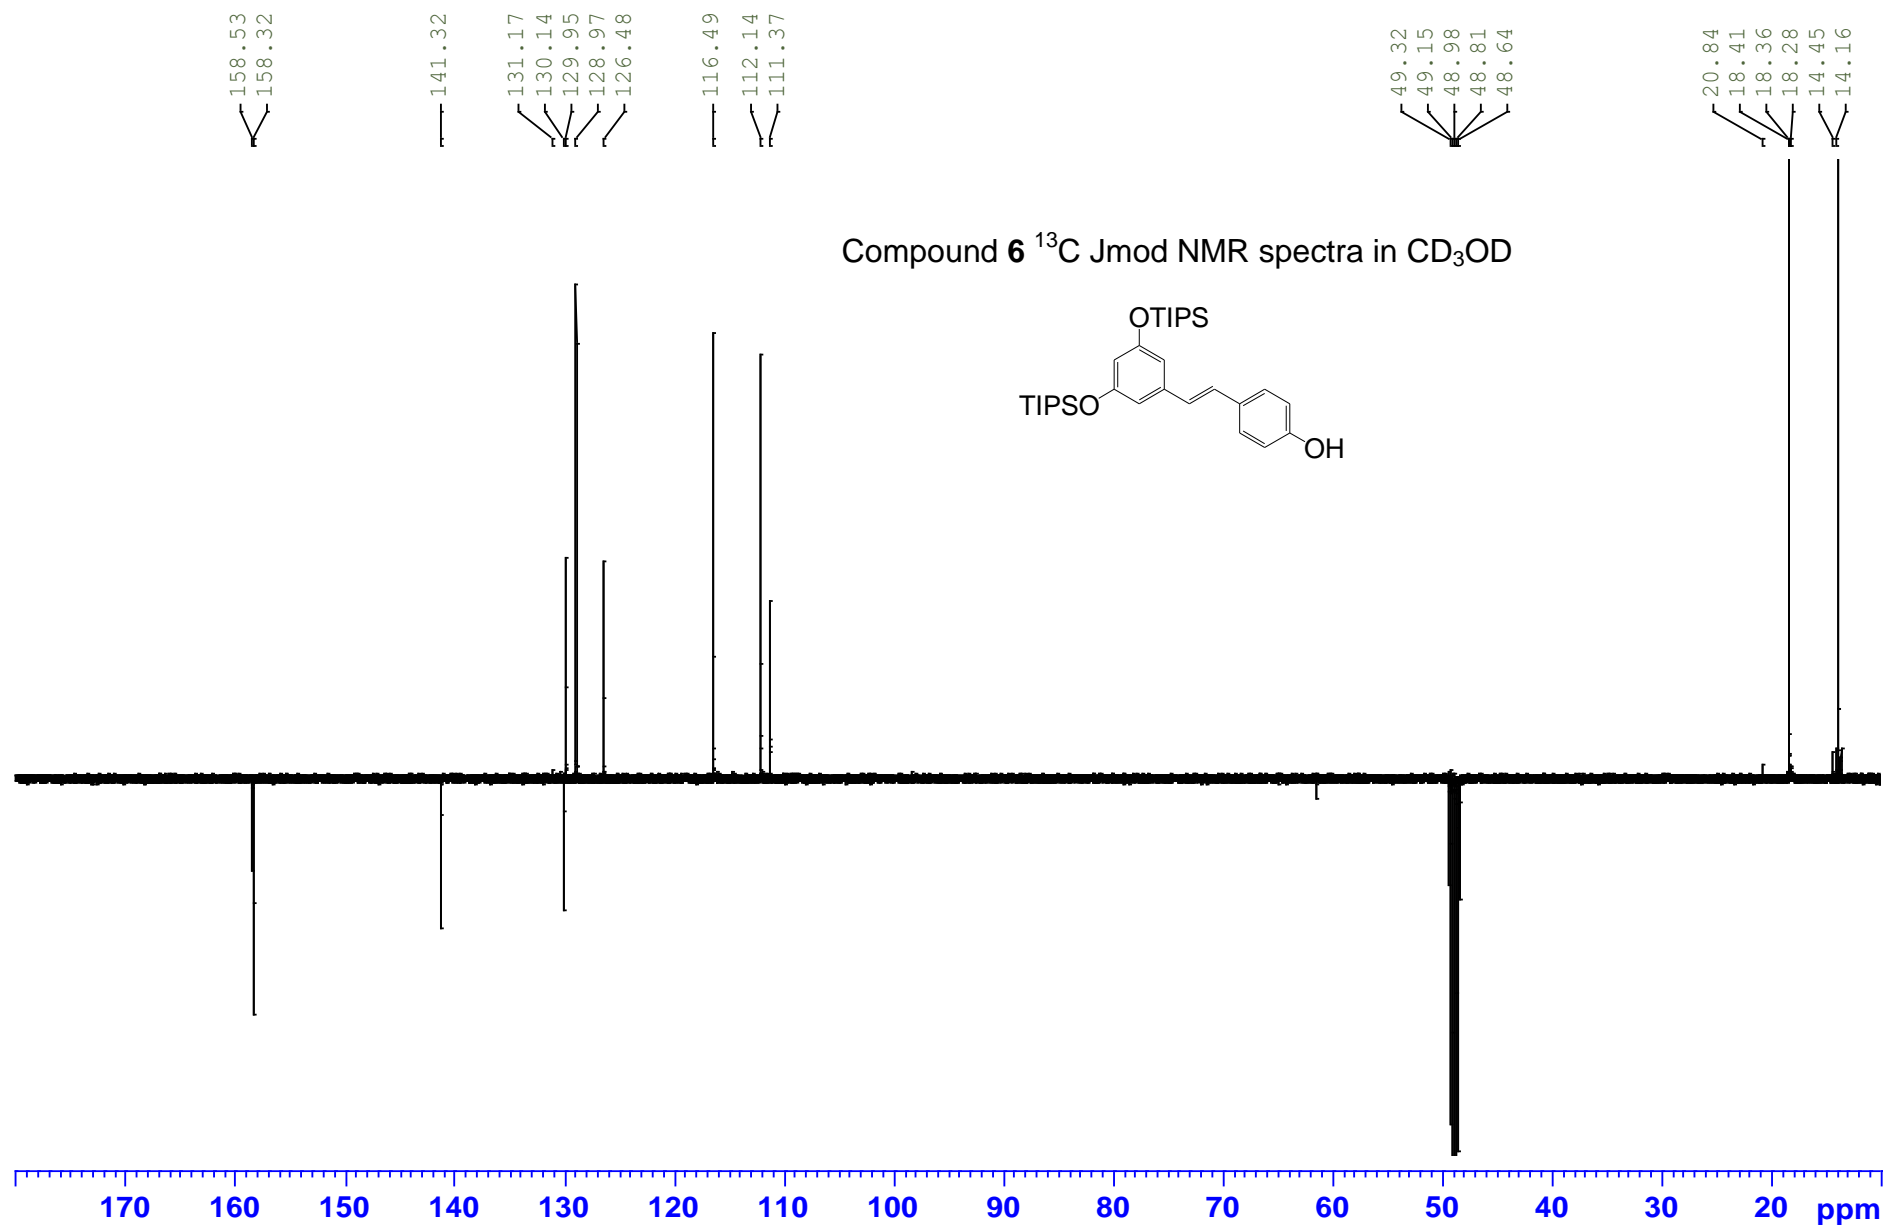

Compound 7 <sup>1</sup>H NMR spectra in CDCl<sub>3</sub>

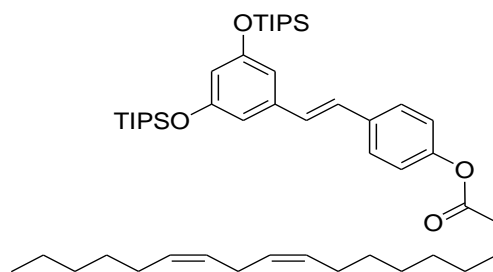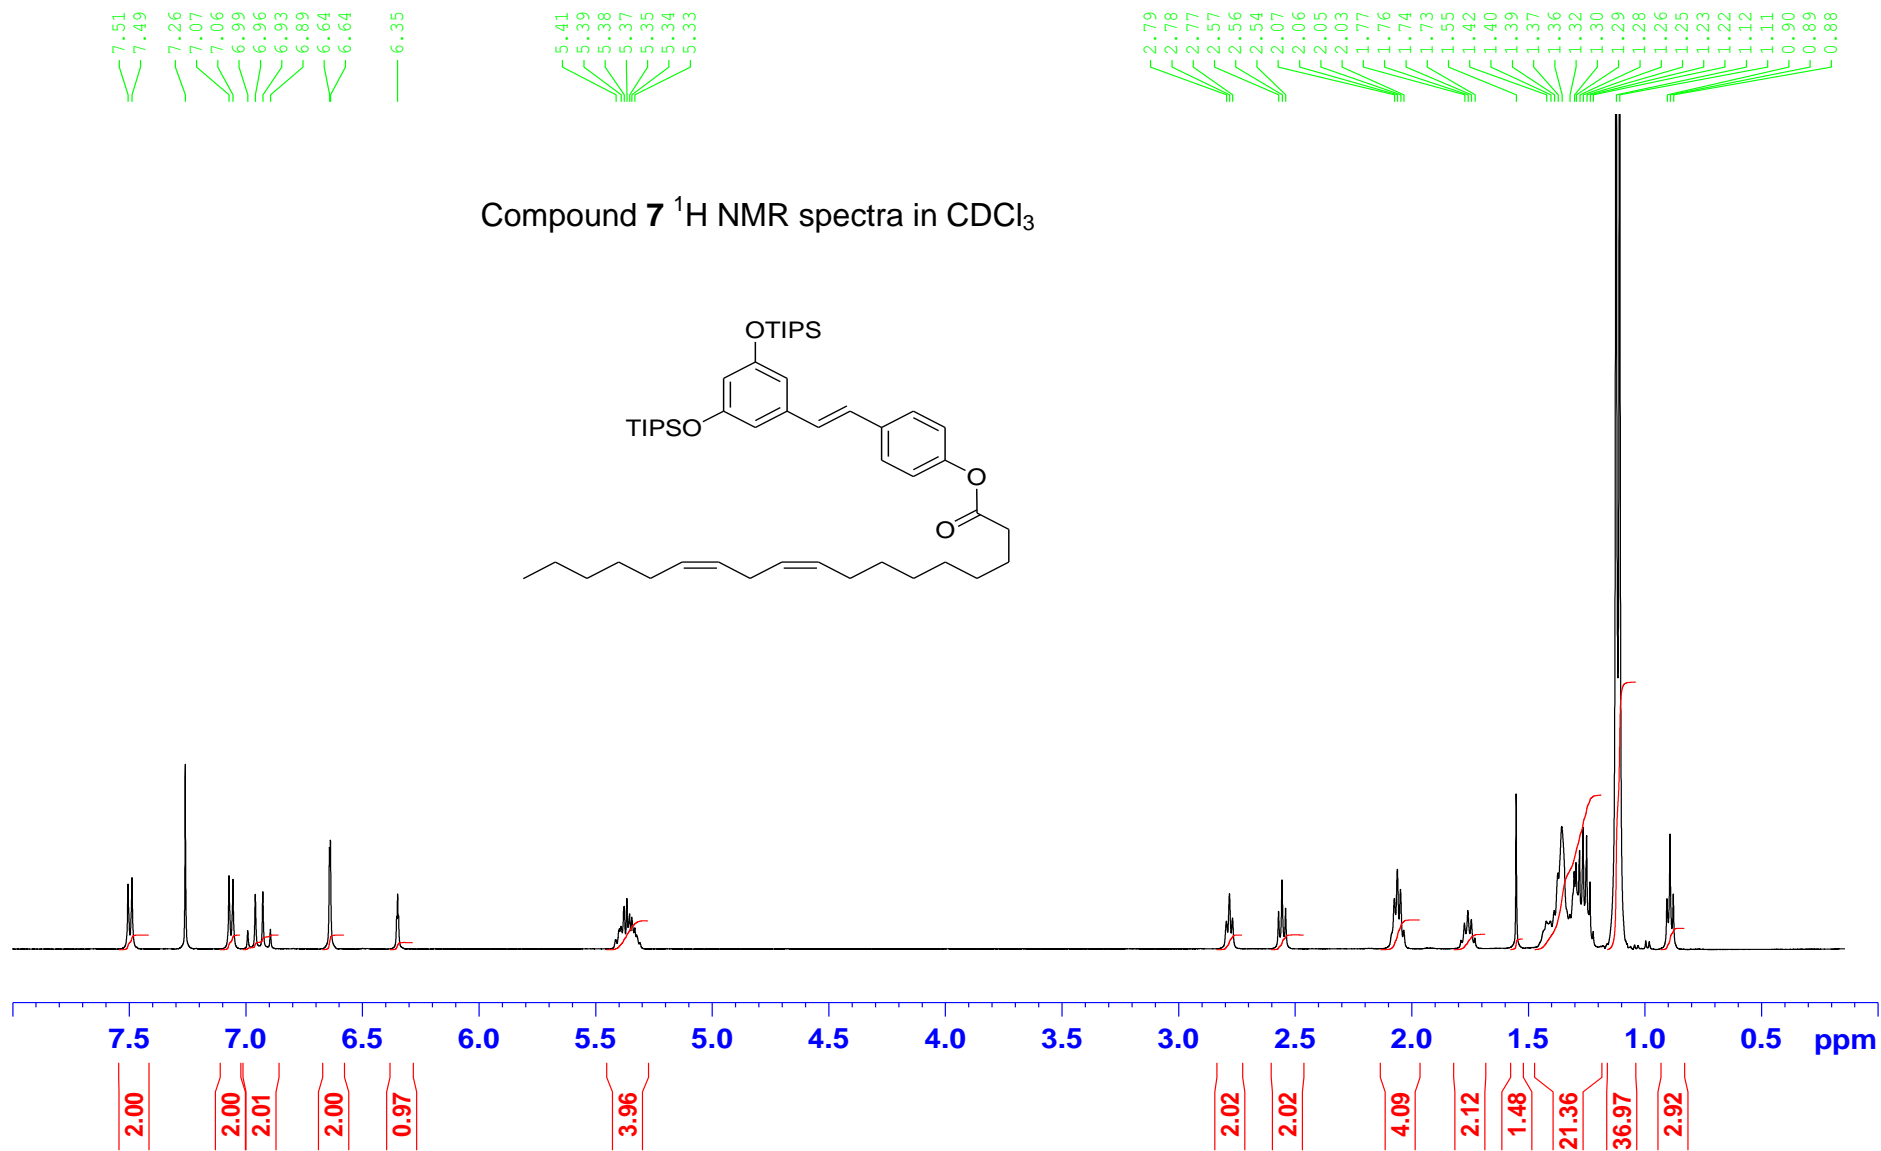

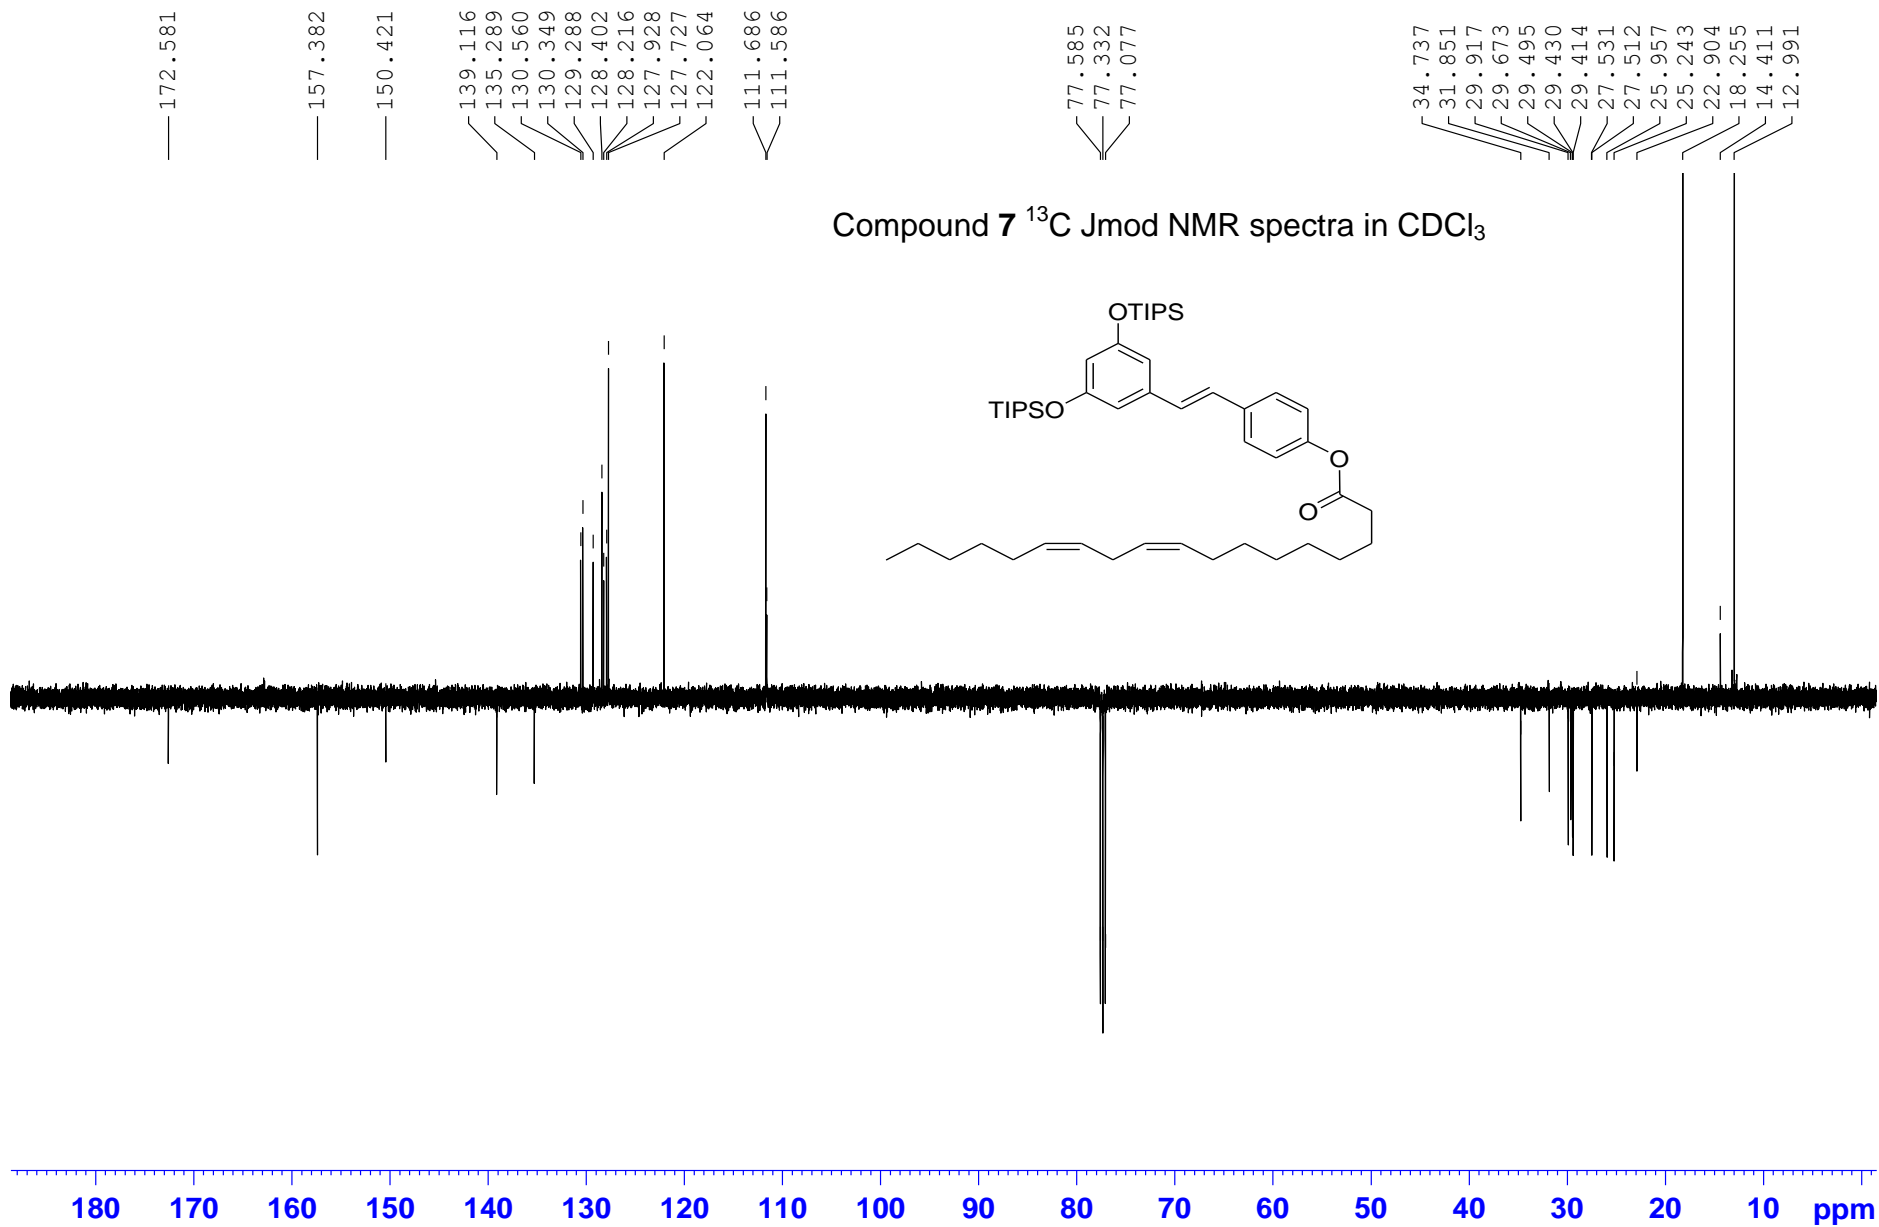

7.359  
7.341  
7.258  
7.011  
6.994  
6.812  
6.779  
6.725  
6.692  
6.408  
6.404  
6.233  
5.988  
5.414  
5.411  
5.395  
5.393  
5.387  
5.378  
5.376  
5.373  
5.362  
5.357  
5.351  
5.343  
5.337  
5.329  
5.321  
5.307

2.791  
2.778  
2.765  
2.580  
2.565  
2.550  
2.068  
2.057  
2.044  
2.030  
1.783  
1.768  
1.753  
1.738  
1.723  
1.425  
1.410  
1.393  
1.380  
1.367  
1.355  
1.343  
1.317  
1.298  
1.291  
1.277  
1.269  
1.255  
0.900

Resve-4'-LA (Compound 8)  $^1\text{H}$  NMR spectra in  $\text{CDCl}_3$

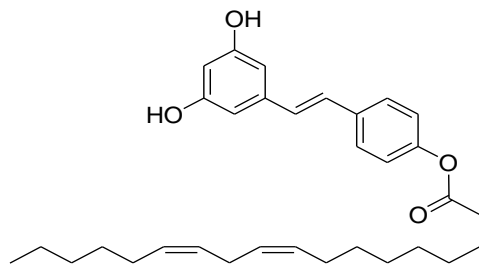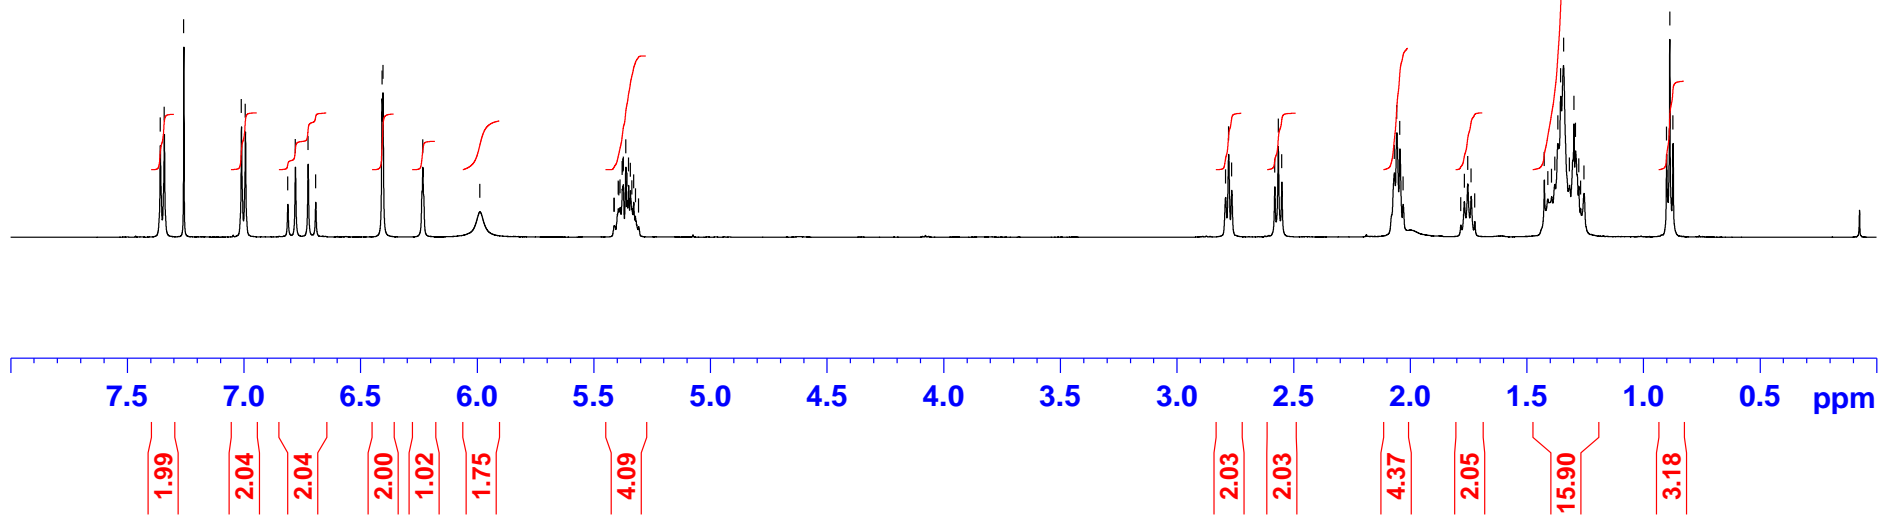

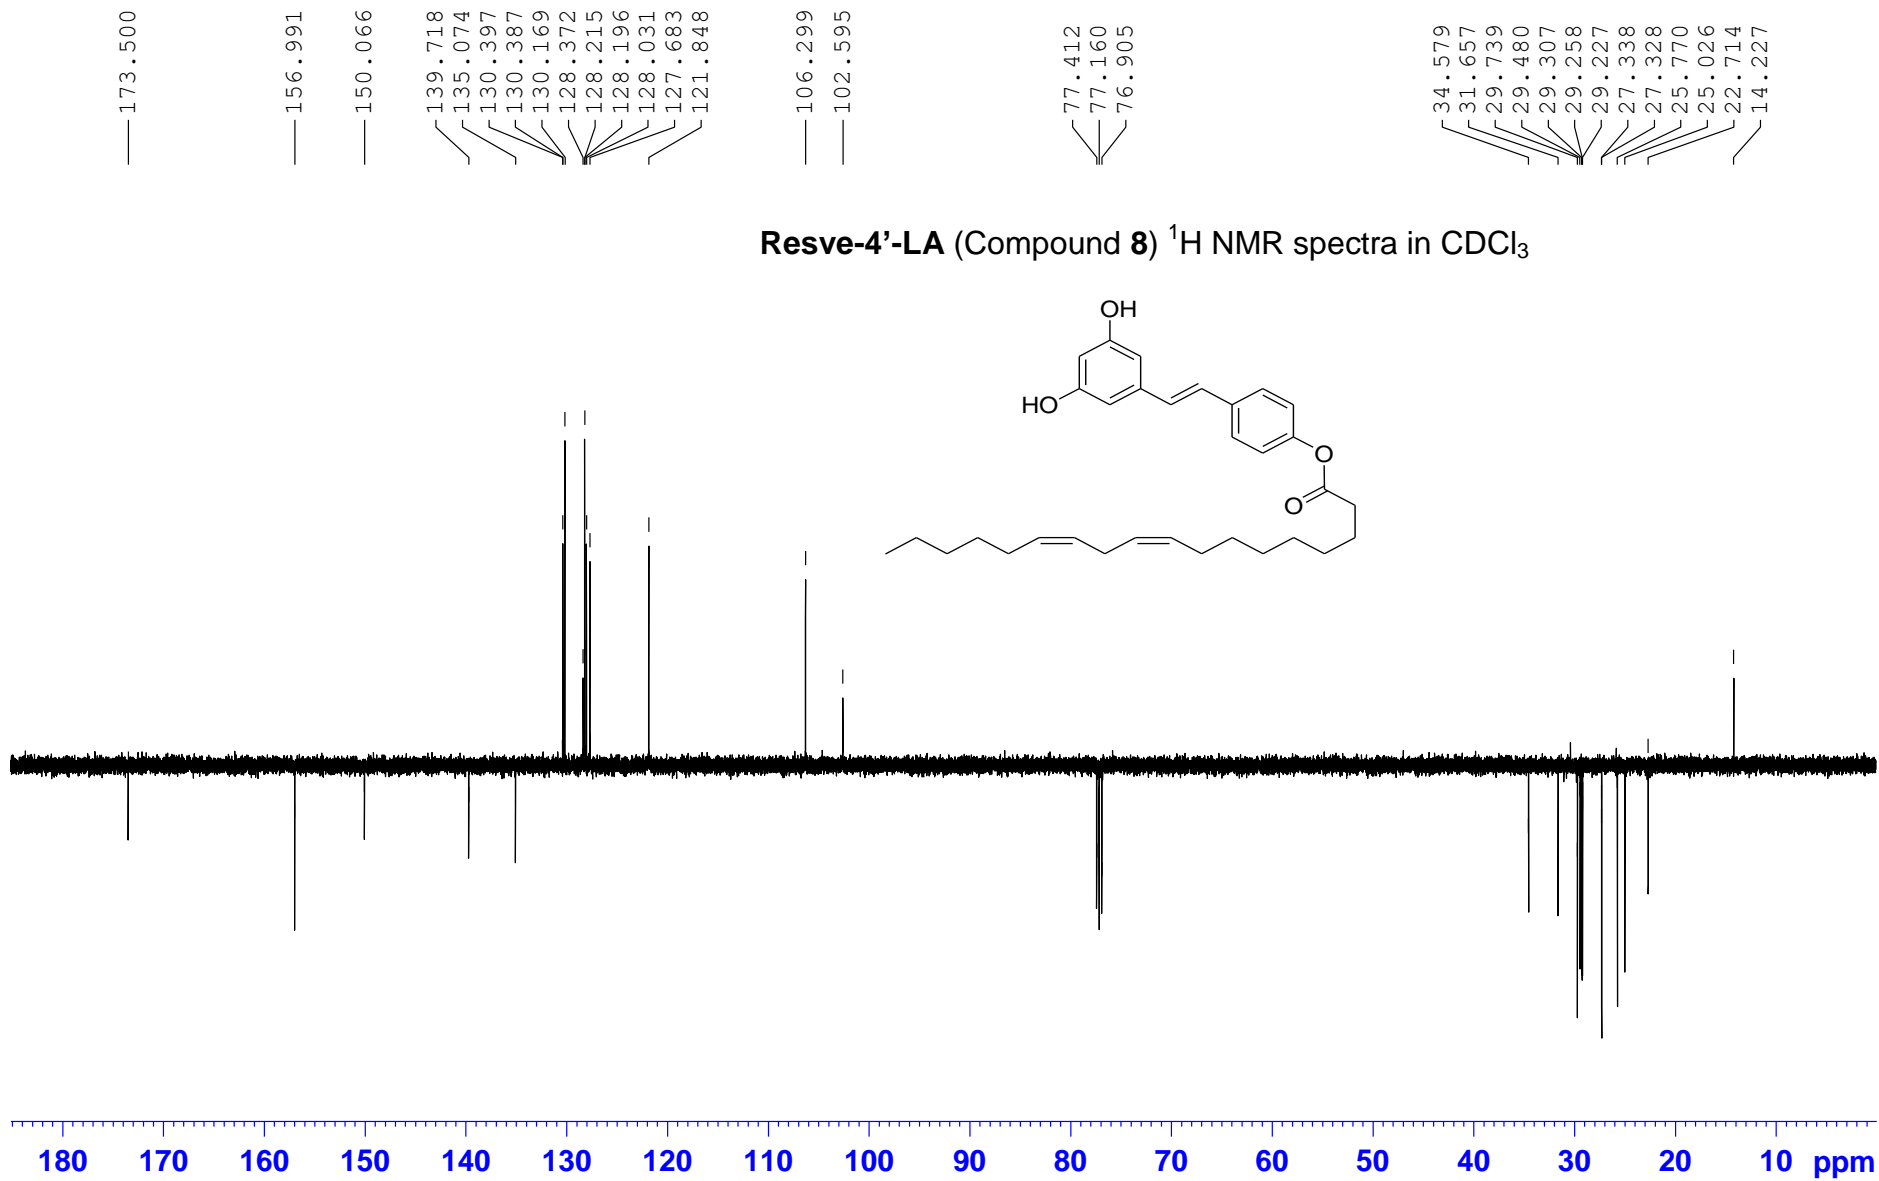



Cat-3-LA (compound 9) <sup>1</sup>H NMR spectra in MeOD

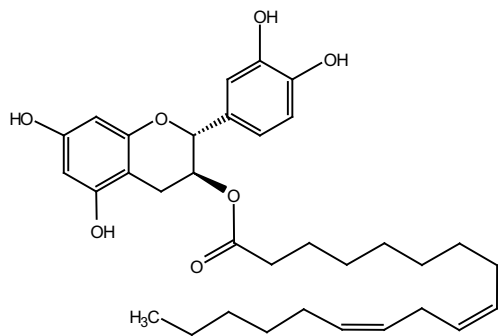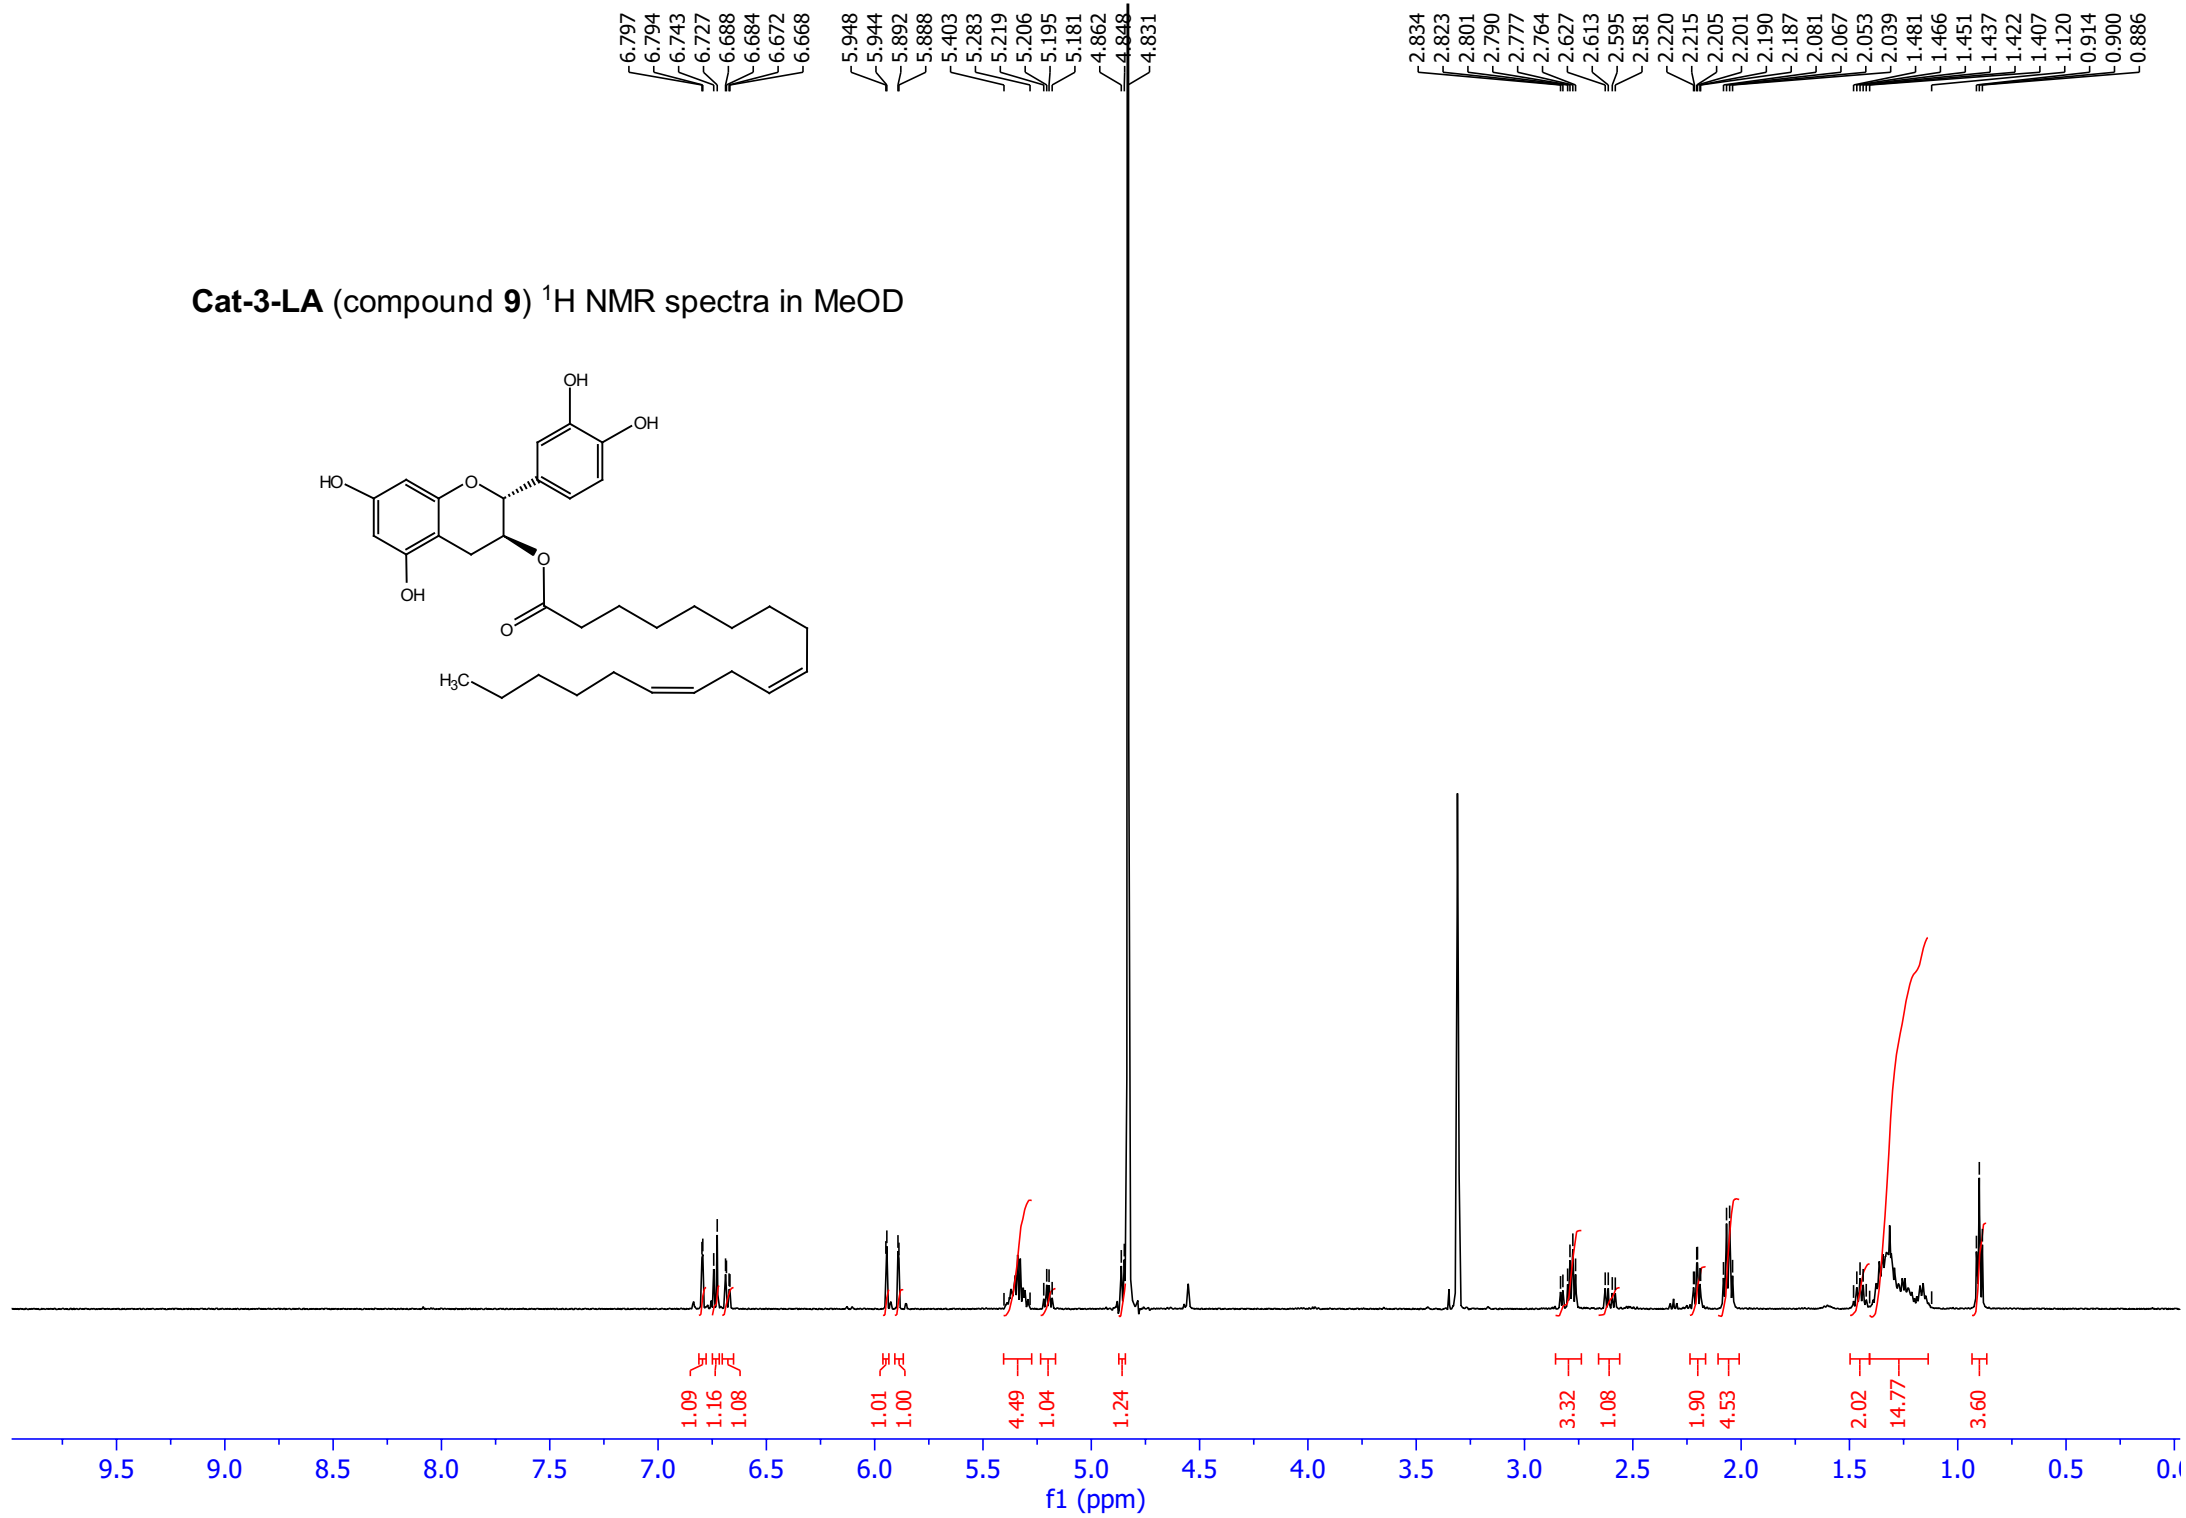

— 174.613

158.167  
157.607  
156.599

146.450  
146.305

131.150  
130.982  
130.933  
129.087  
129.037

119.528  
116.102  
114.791

99.718  
96.488  
95.561

— 79.679

— 70.965

35.219  
32.654  
30.682  
30.467  
30.170  
30.099  
29.901  
28.155  
28.138  
26.539  
25.999  
25.128  
23.614  
14.412

Cat-3-LA (compound 9) <sup>13</sup>C Jmod NMR spectra in MeOD

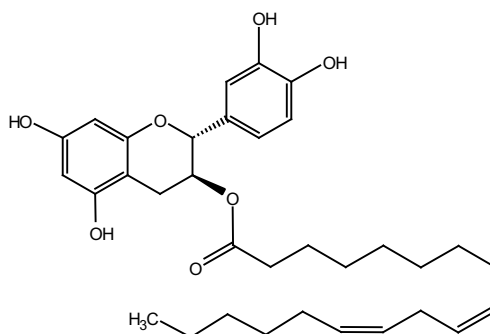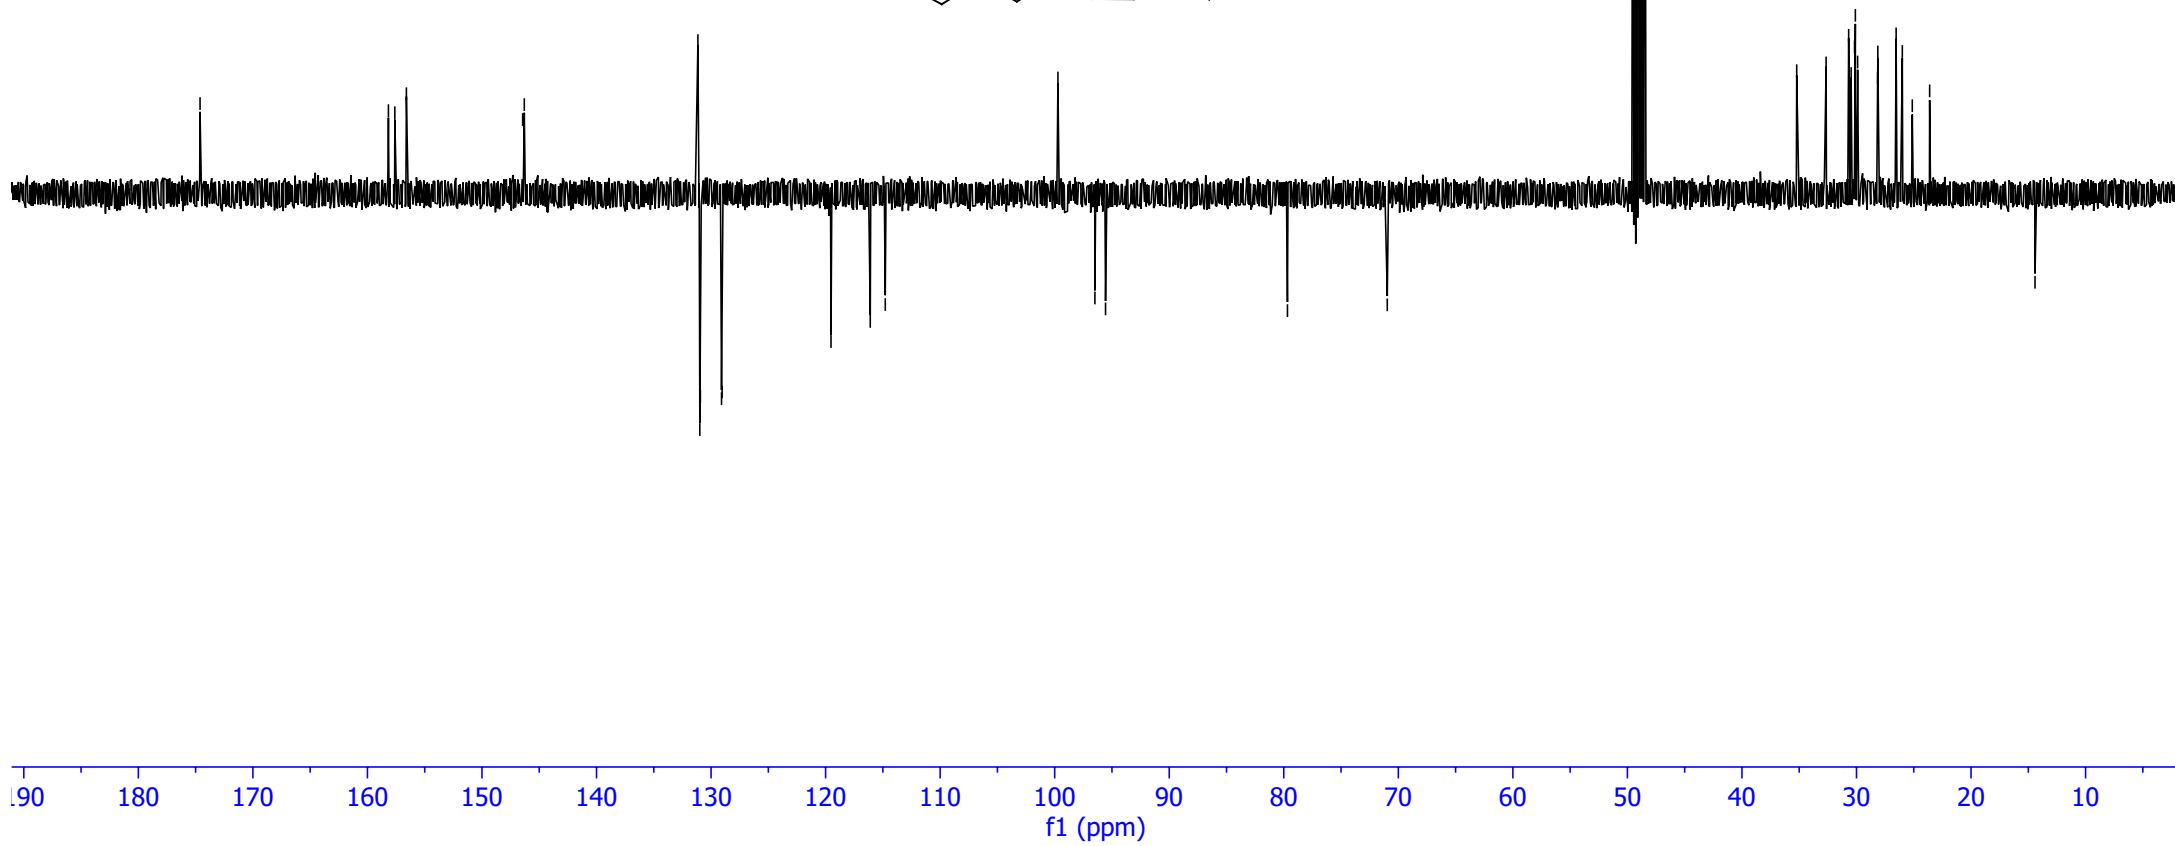

7.709  
7.705  
7.692  
7.688  
7.659  
7.655  
7.330  
7.315  
7.313  
7.310  
6.842  
6.837

5.425  
5.286

2.789  
2.777  
2.765  
2.742  
2.727  
2.712  
2.629  
2.532  
2.084  
2.071  
2.057  
2.042  
2.028  
1.829  
1.659  
1.473  
1.237  
0.903  
0.901  
0.889  
0.888  
0.887  
0.885  
0.875

Compound 10 <sup>1</sup>H NMR spectra in CDCl<sub>3</sub>

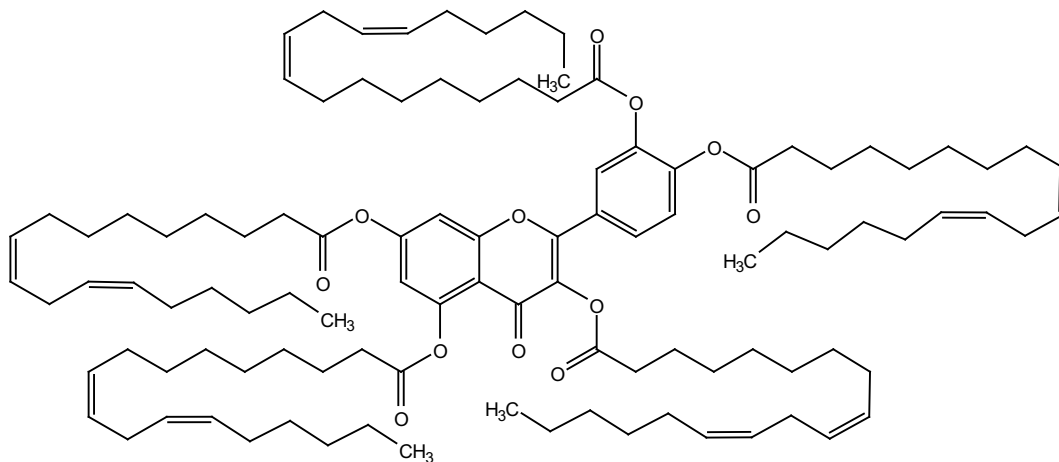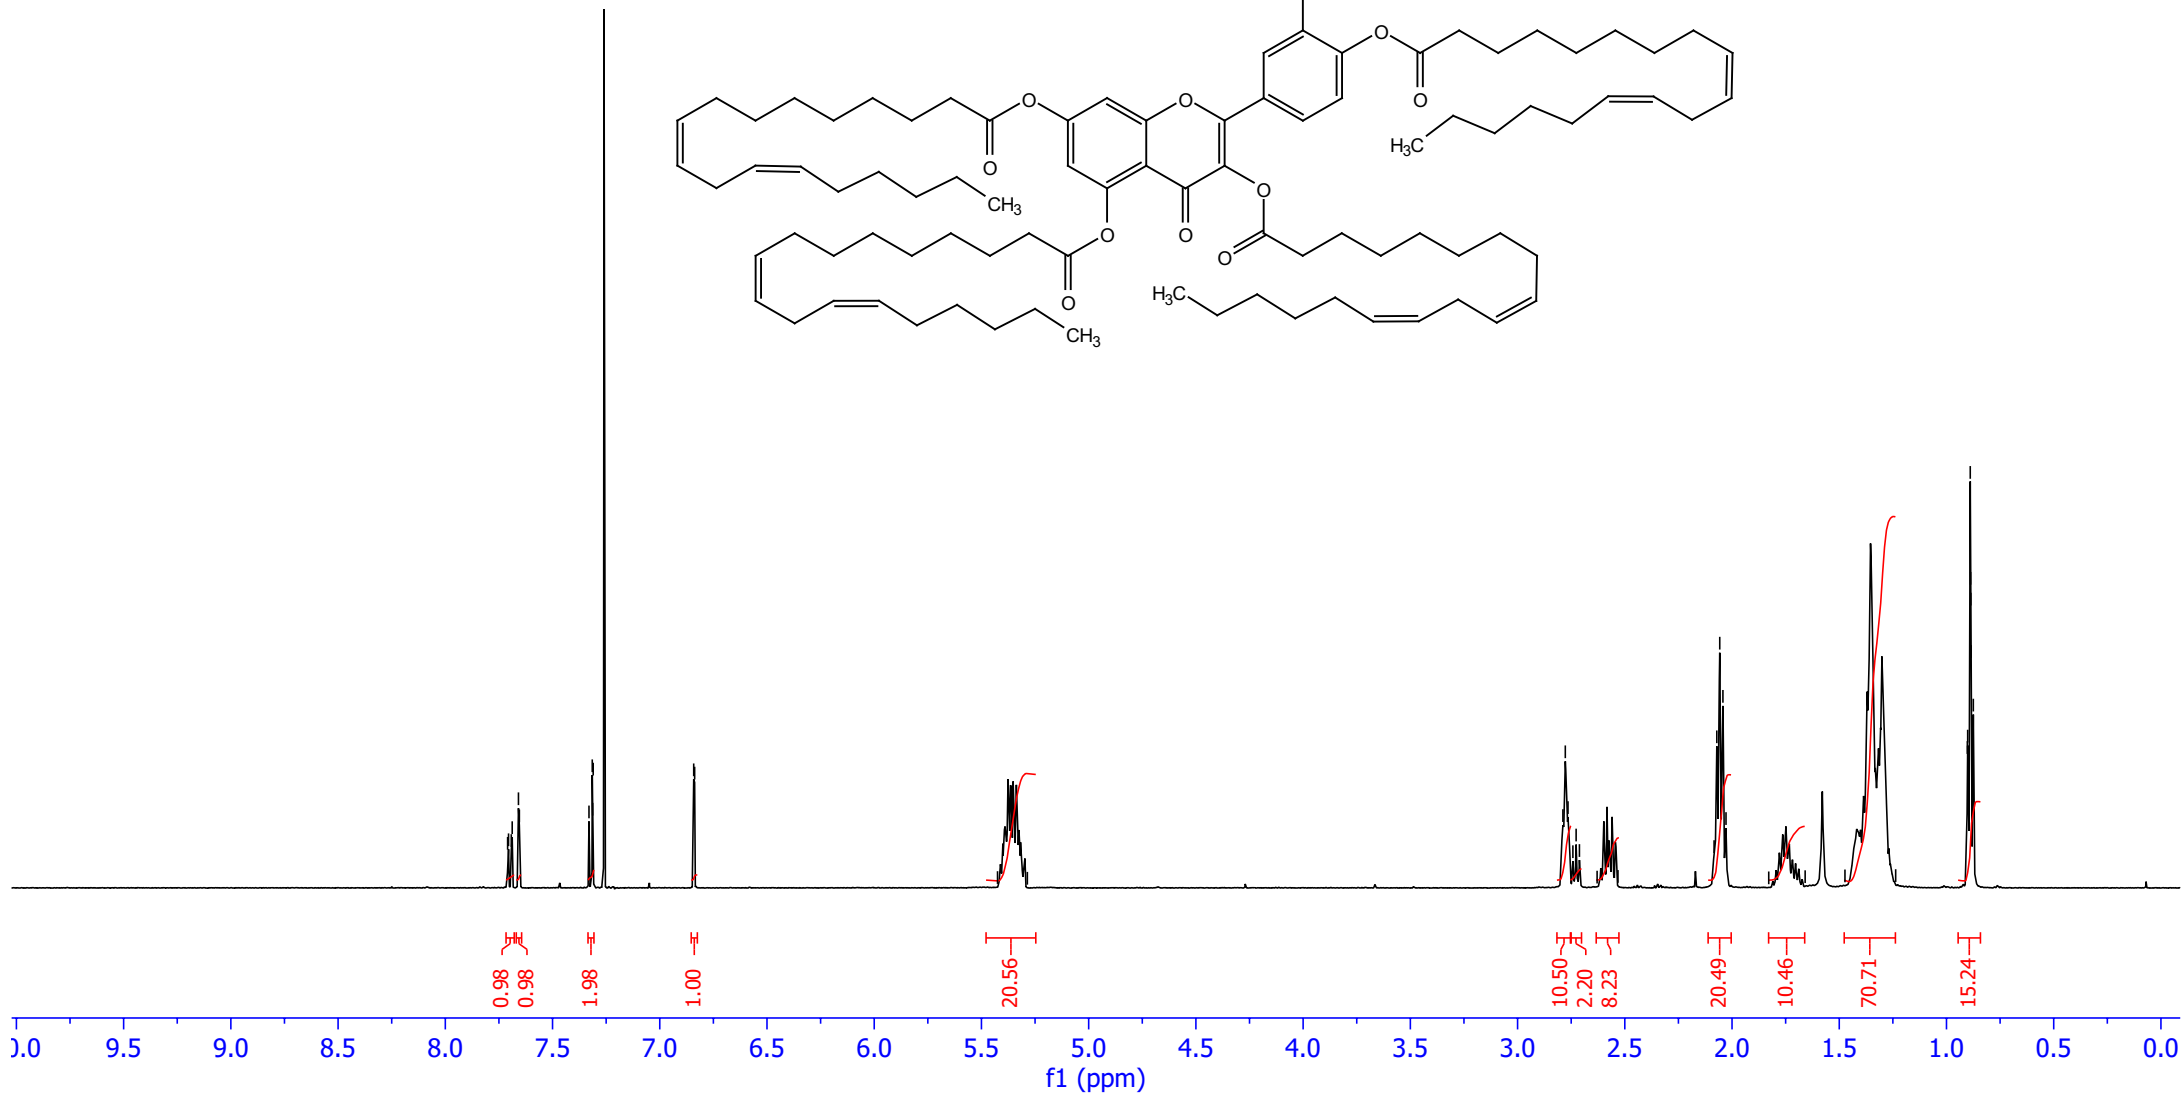

172.012  
170.786  
170.630  
170.594  
170.549  
169.965

156.839  
154.274  
153.597  
150.532

144.446  
142.266

134.065  
130.240  
130.234  
130.221

130.201  
130.195  
130.087  
130.048

129.959  
129.904  
129.898  
128.129

128.123  
128.094  
127.997  
127.993

127.912  
127.890  
127.861  
127.835

127.752  
123.830  
123.768  
114.789

34.358  
34.100  
34.060  
34.001

33.728  
31.507  
29.641  
29.623

29.601  
29.569  
29.326  
29.253

29.238  
29.202  
29.175  
29.170

29.131  
29.122  
29.116  
29.105

29.091  
29.048  
28.997  
28.985

27.219  
27.212  
27.185  
27.171

27.155  
25.615  
24.868  
24.841

24.673  
24.575  
24.424  
22.560

14.067

Compound 10 <sup>13</sup>C NMR spectra in CDCl<sub>3</sub>

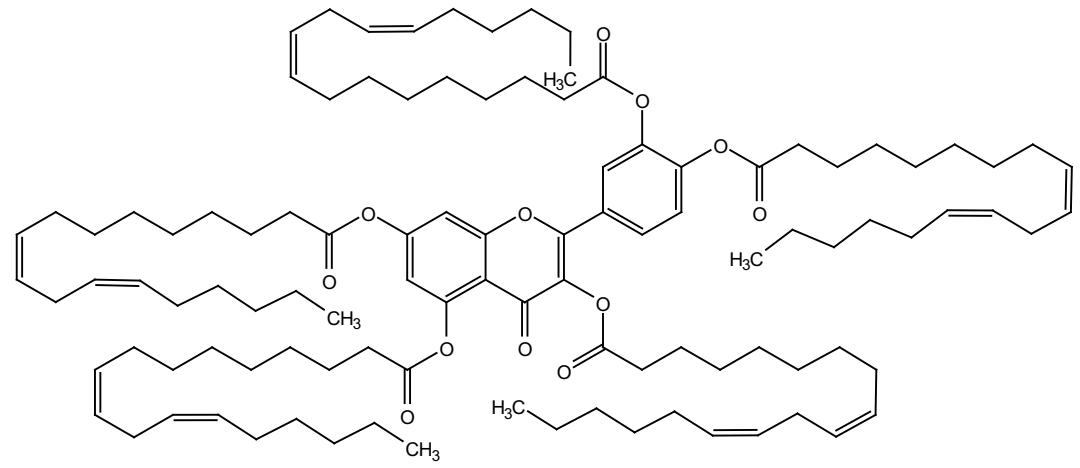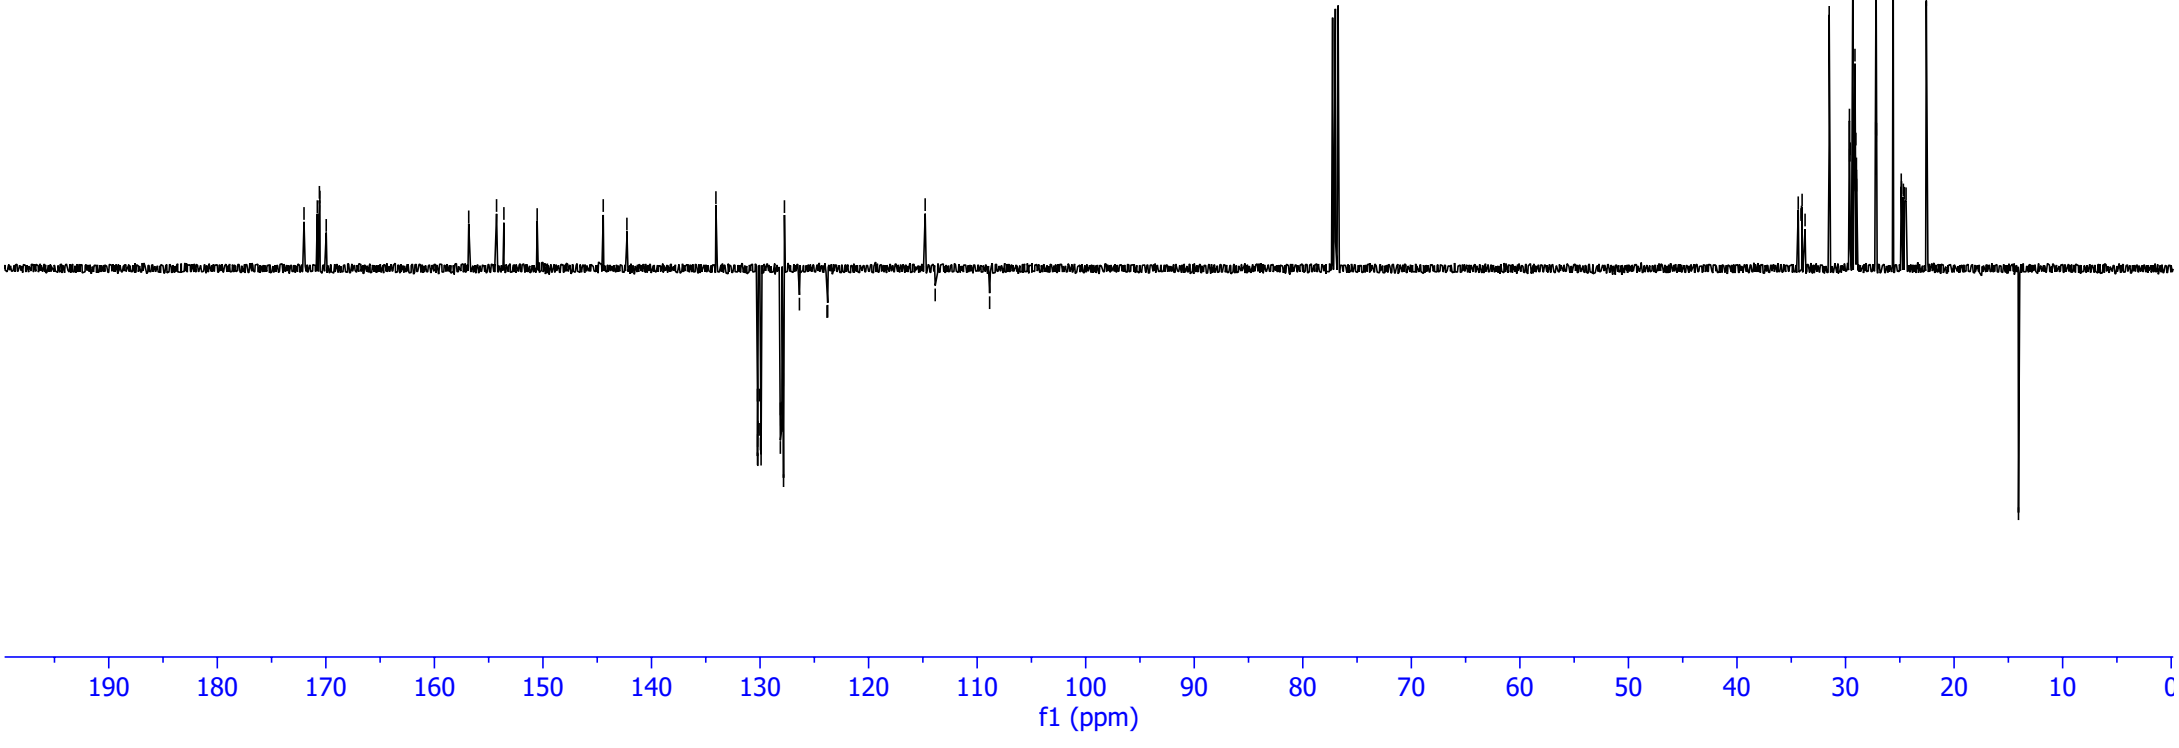

7.742  
7.738  
7.725  
7.721  
7.704  
7.700  
7.351  
7.334

6.846  
6.842  
6.584  
6.580

5.439  
5.272

2.823  
2.812  
2.801  
2.647  
2.632  
2.617  
2.594  
2.580  
2.566  
2.551  
2.107  
2.092  
2.078  
2.065  
1.781  
1.767  
1.752  
1.741  
1.727  
1.712  
1.458  
1.300  
0.991  
0.989  
0.988  
0.976  
0.974  
0.973  
0.961  
0.959  
0.958

Compound 11 <sup>1</sup>H NMR spectra in CDCl<sub>3</sub>

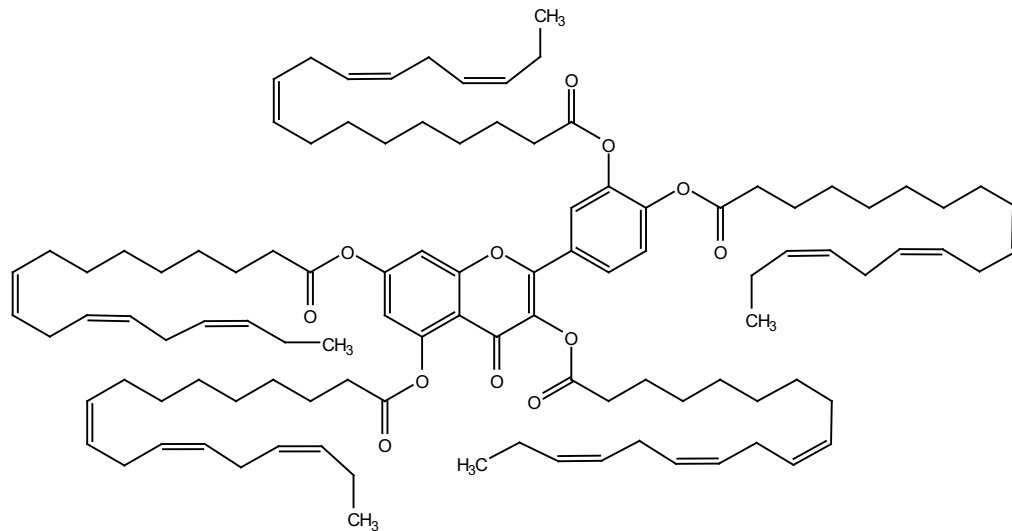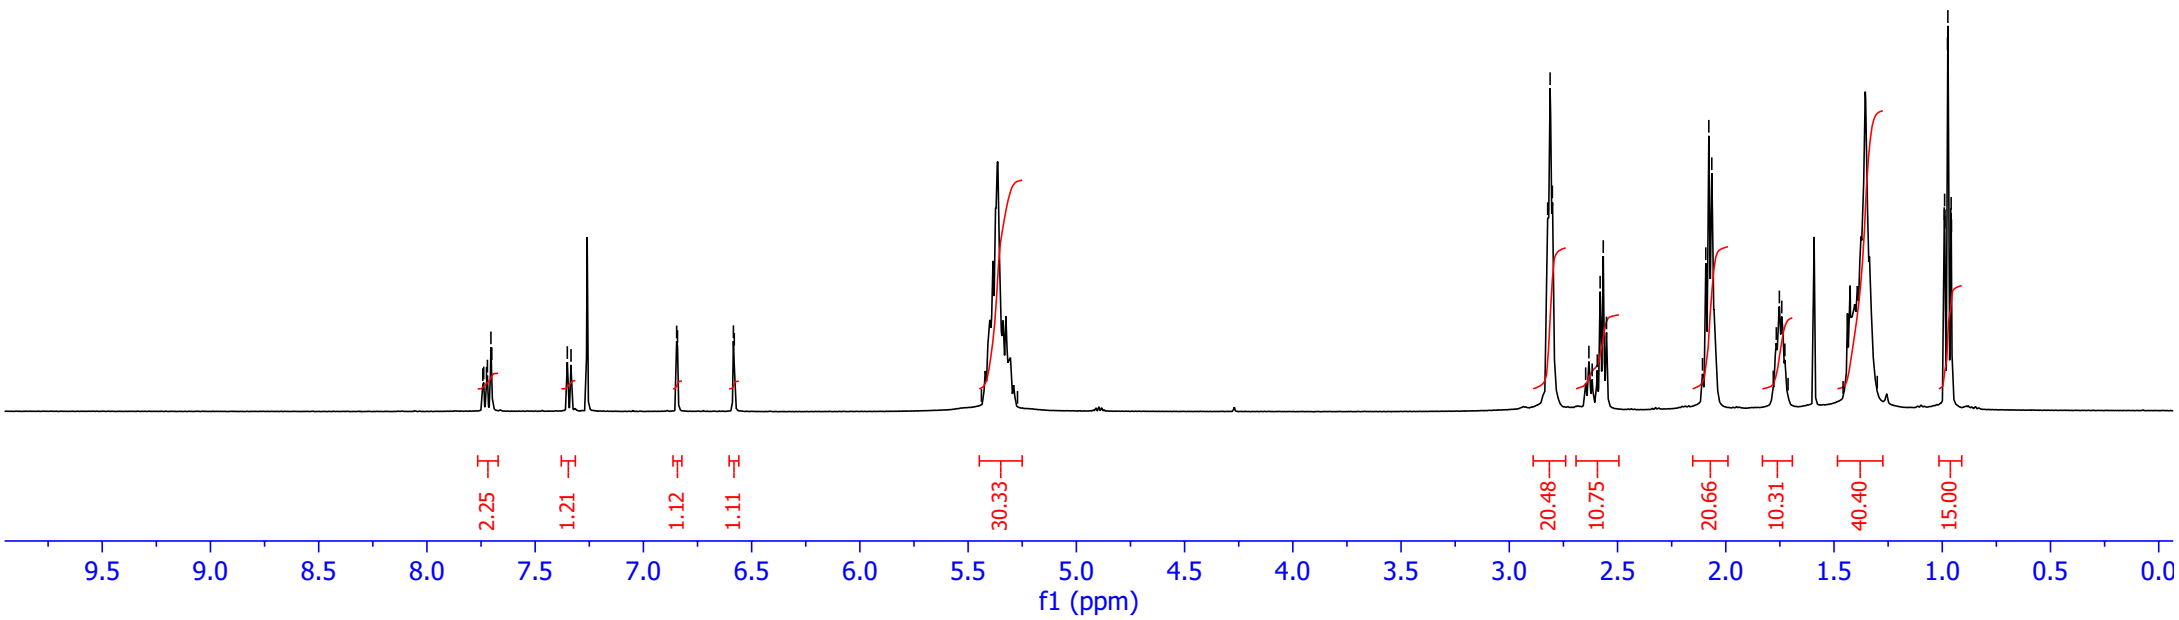

176.257  
171.070  
170.622  
170.584  
170.511

161.668  
156.407  
155.906  
155.472

144.714  
142.304  
132.189  
131.928  
131.918  
130.237  
130.171  
130.094  
130.081  
128.289  
128.253  
128.253  
128.212  
128.192  
128.152  
127.804  
127.753  
127.685  
127.469  
127.071  
127.063  
127.044  
126.457  
123.952  
123.927  
108.711  
105.440  
101.122

34.356  
34.031  
33.986  
33.684  
29.581  
29.570  
29.531  
29.215  
29.181  
29.105  
29.066  
29.034  
28.981  
28.953  
28.819  
27.188  
27.163  
25.585  
25.494  
24.843  
24.800  
24.711  
24.613  
20.522  
14.260

Compound 11 <sup>13</sup>C Jmod NMR spectra in CDCl<sub>3</sub>

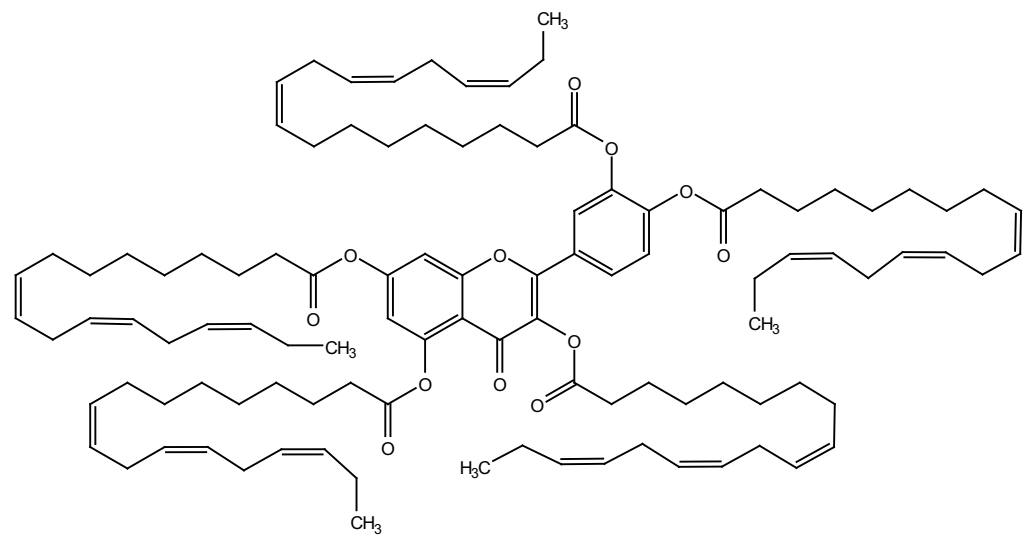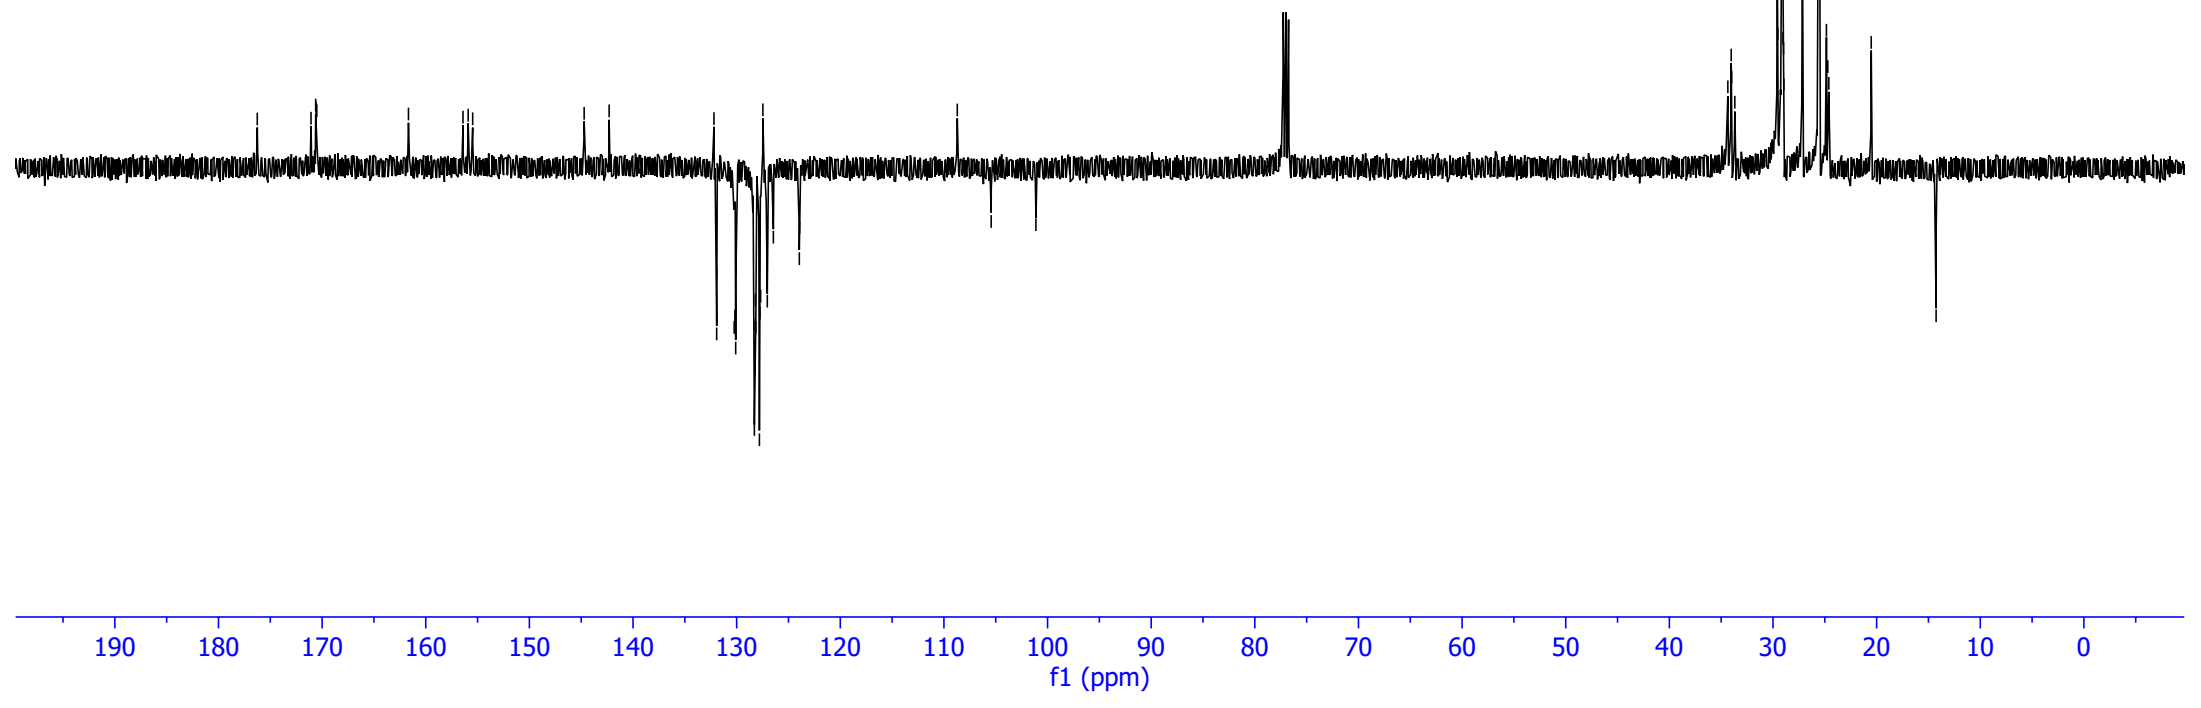

7.749  
7.742  
7.715  
7.711  
7.363  
7.360  
7.336  
7.333  
6.850  
6.843  
6.594  
6.587

5.566  
5.248

2.925  
2.775  
2.755  
2.603  
2.575  
2.464  
2.118  
2.093  
2.070  
2.069  
2.046  
2.021

0.993  
0.968  
0.943

Compound **12**  $^1\text{H}$  NMR spectra in  $\text{CDCl}_3$

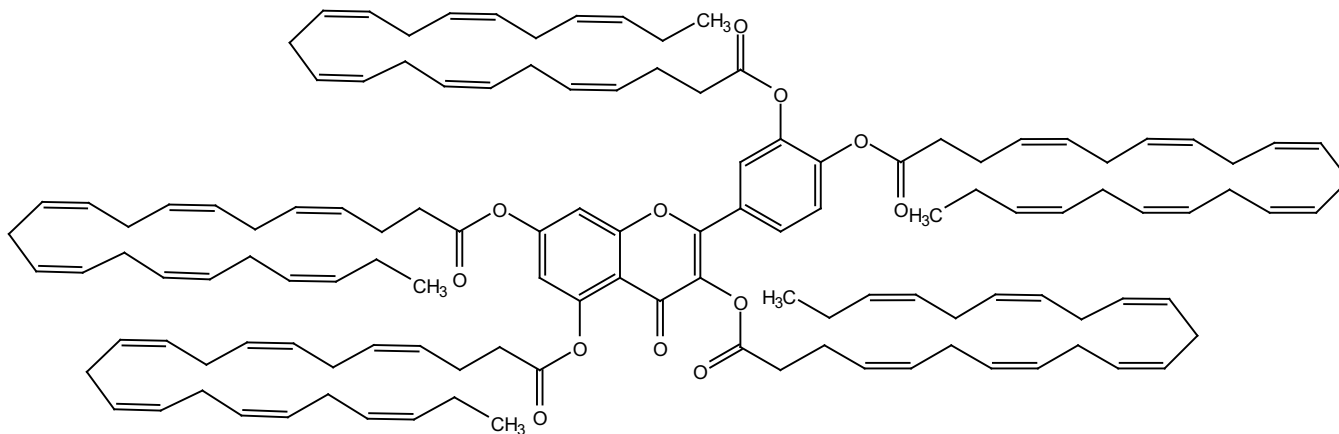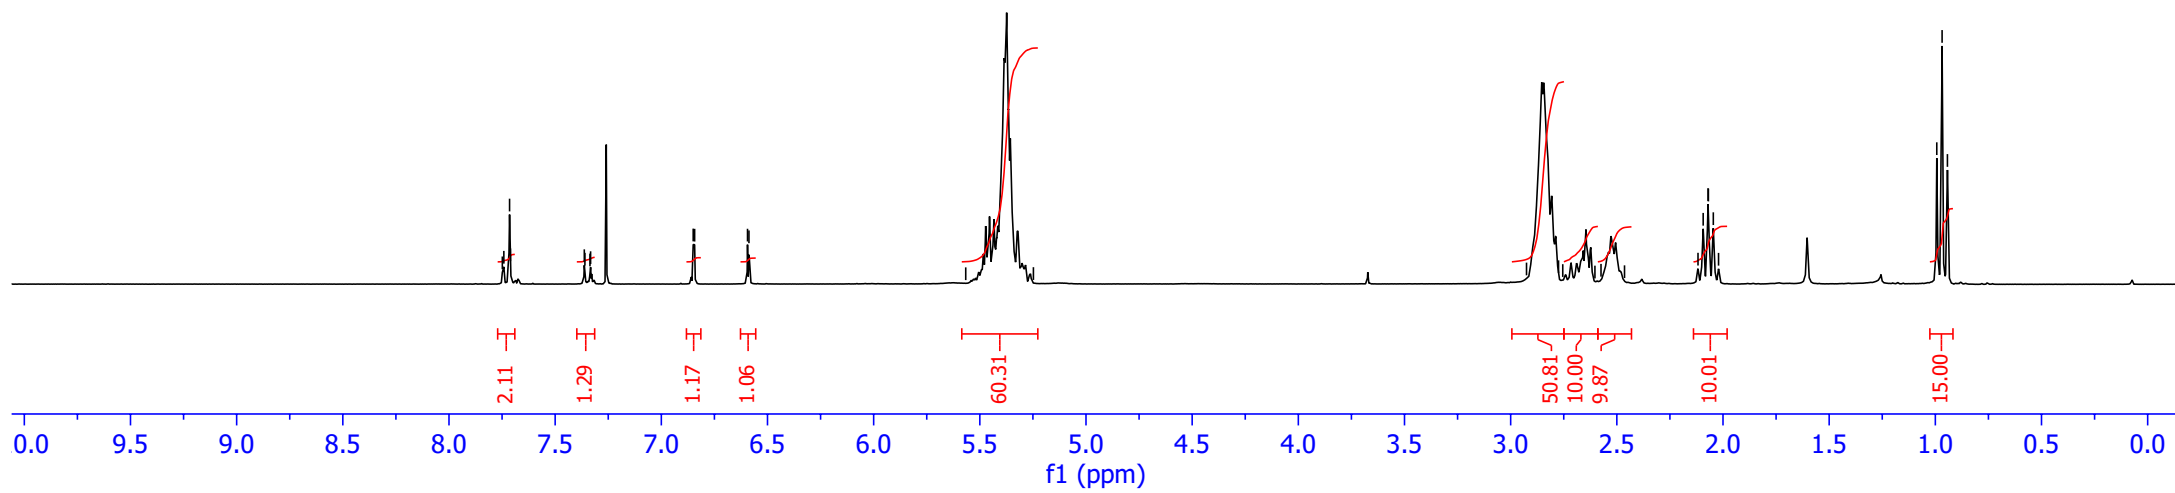

176.155  
 170.375  
 170.014  
 169.960  
 169.859  
 161.695  
 156.353  
 155.895  
 155.447  
 144.639  
 142.235  
 132.209  
 131.997  
 130.049  
 129.751  
 128.500  
 128.418  
 128.284  
 127.987  
 127.809  
 127.744  
 127.482  
 127.317  
 127.091  
 126.968  
 126.538  
 123.940  
 108.744  
 105.484  
 101.106  
 34.262  
 33.906  
 33.562  
 25.604  
 25.501  
 22.524  
 20.522  
 14.246

Compound **12** <sup>13</sup>C Jmod NMR spectra in CDCl<sub>3</sub>

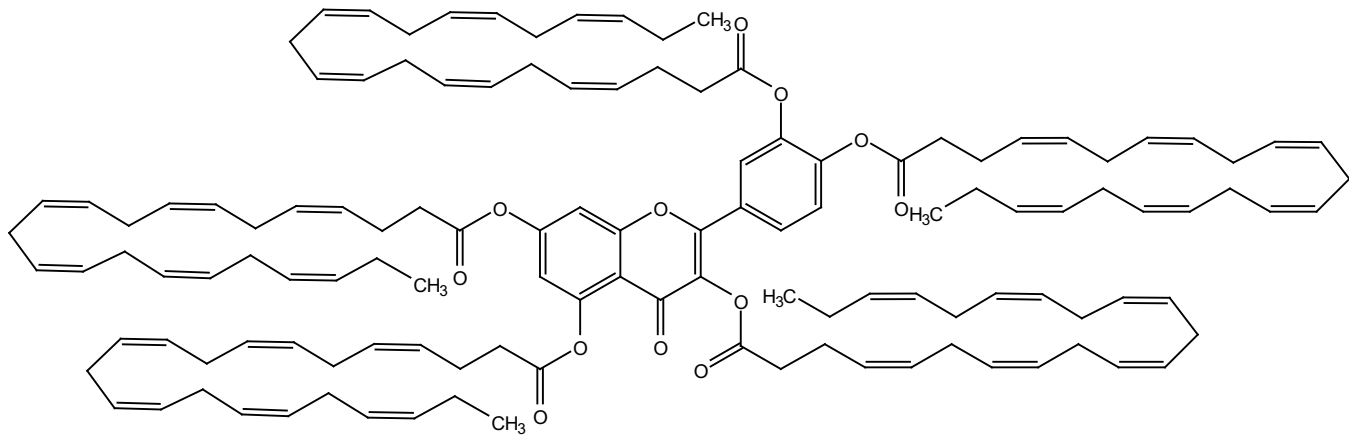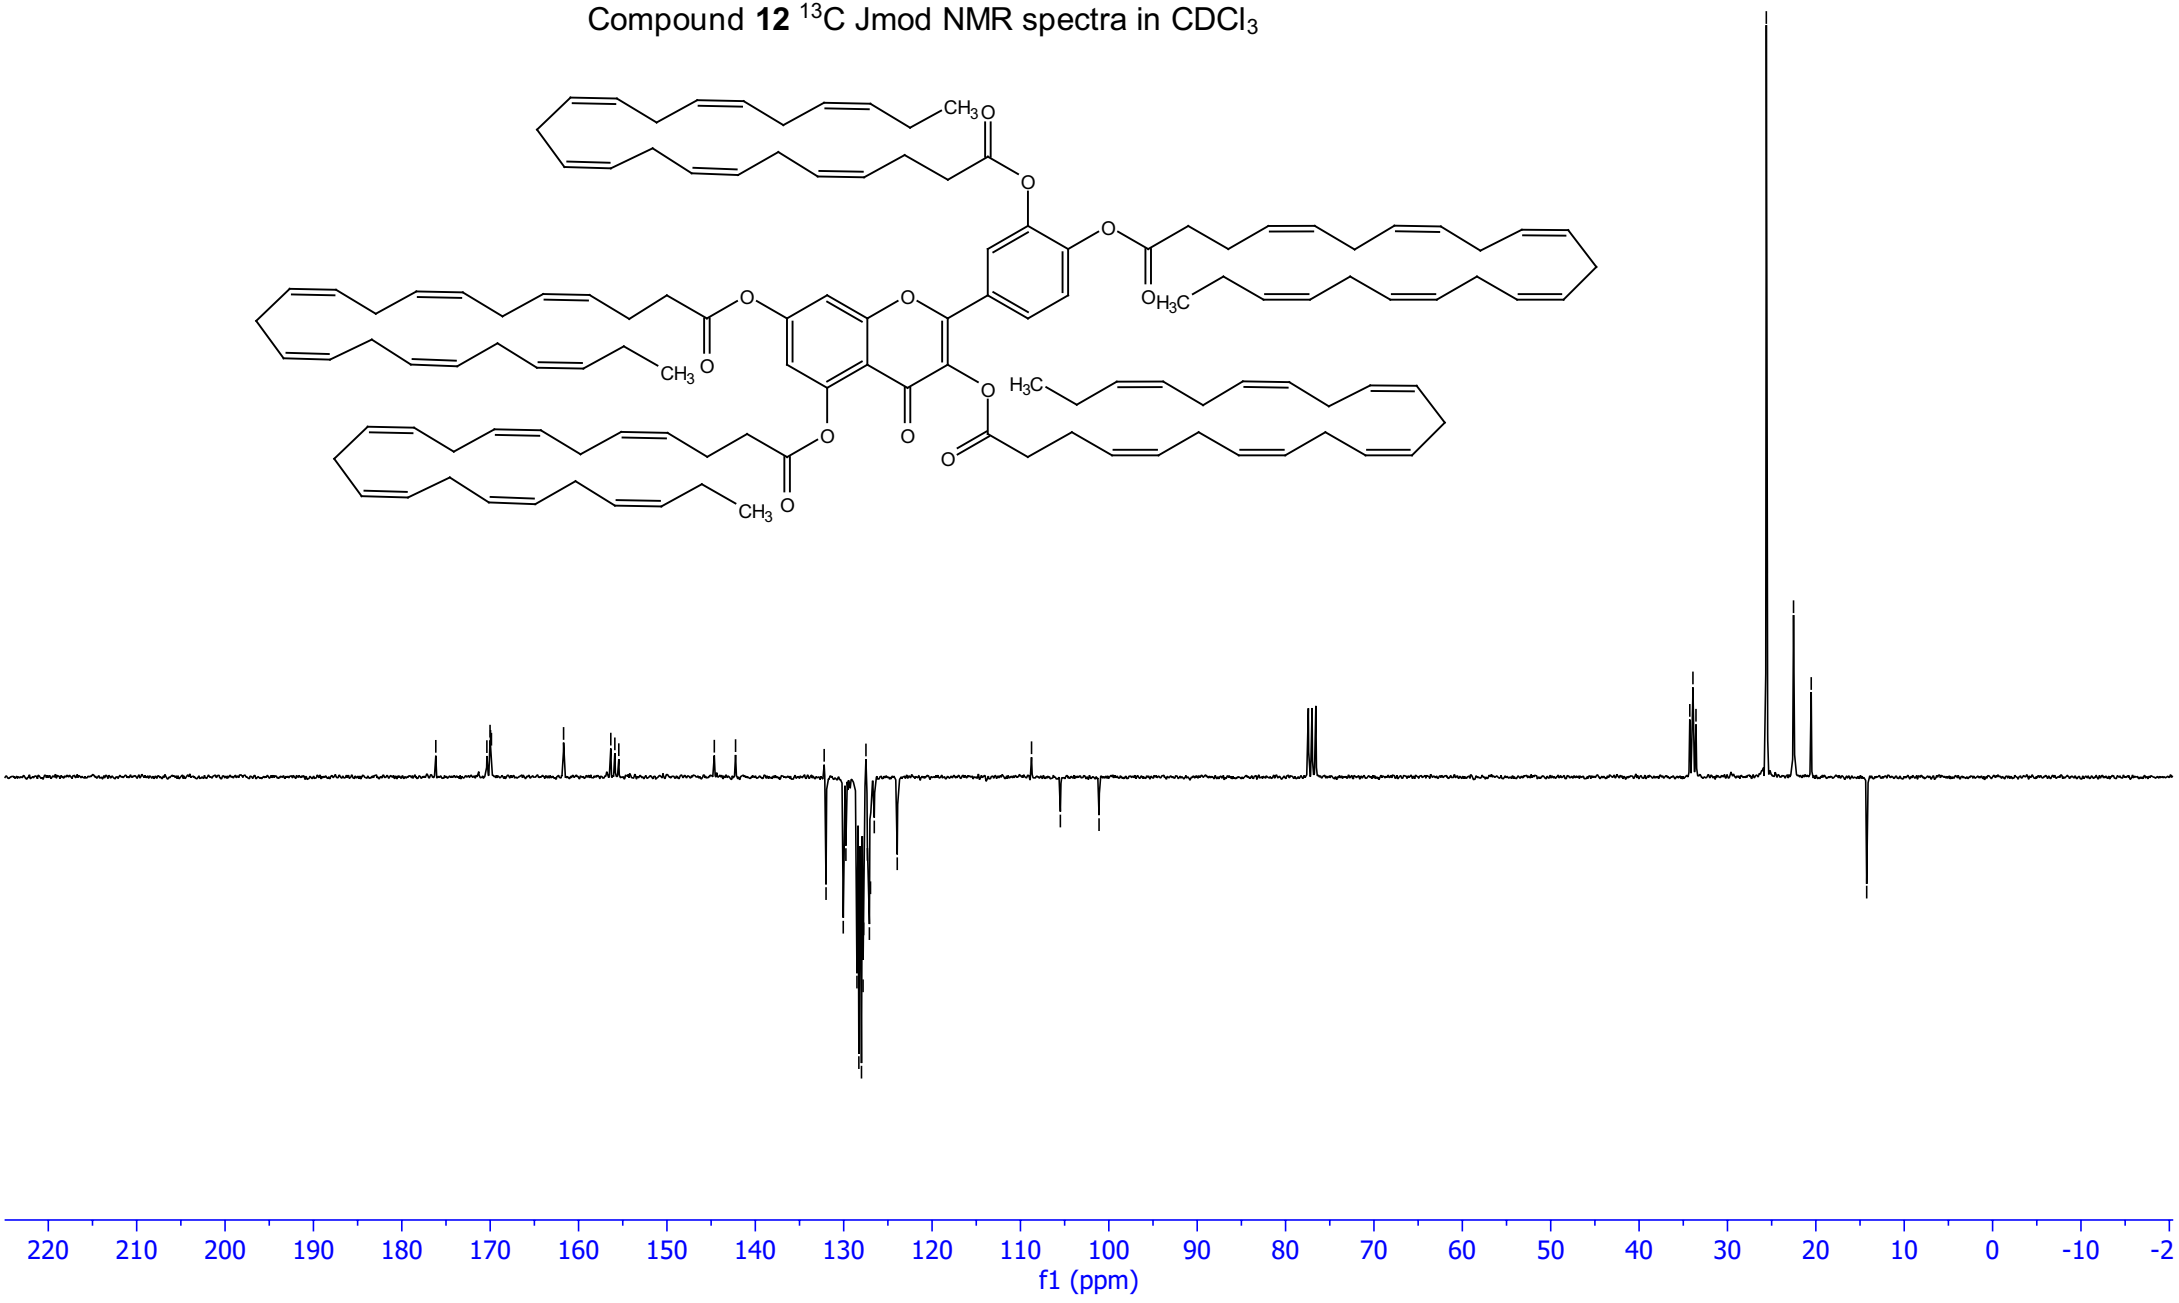



Quer-3-LA (compound 13) <sup>1</sup>H NMR spectra in CD<sub>3</sub>OD

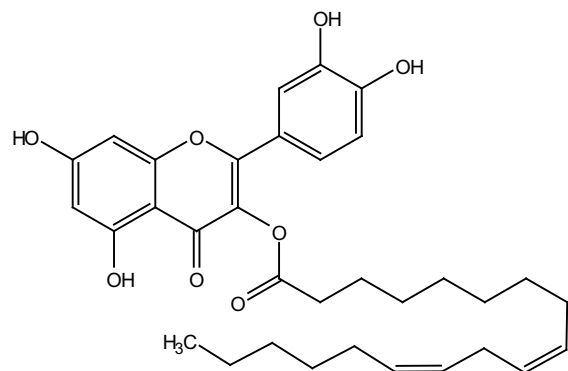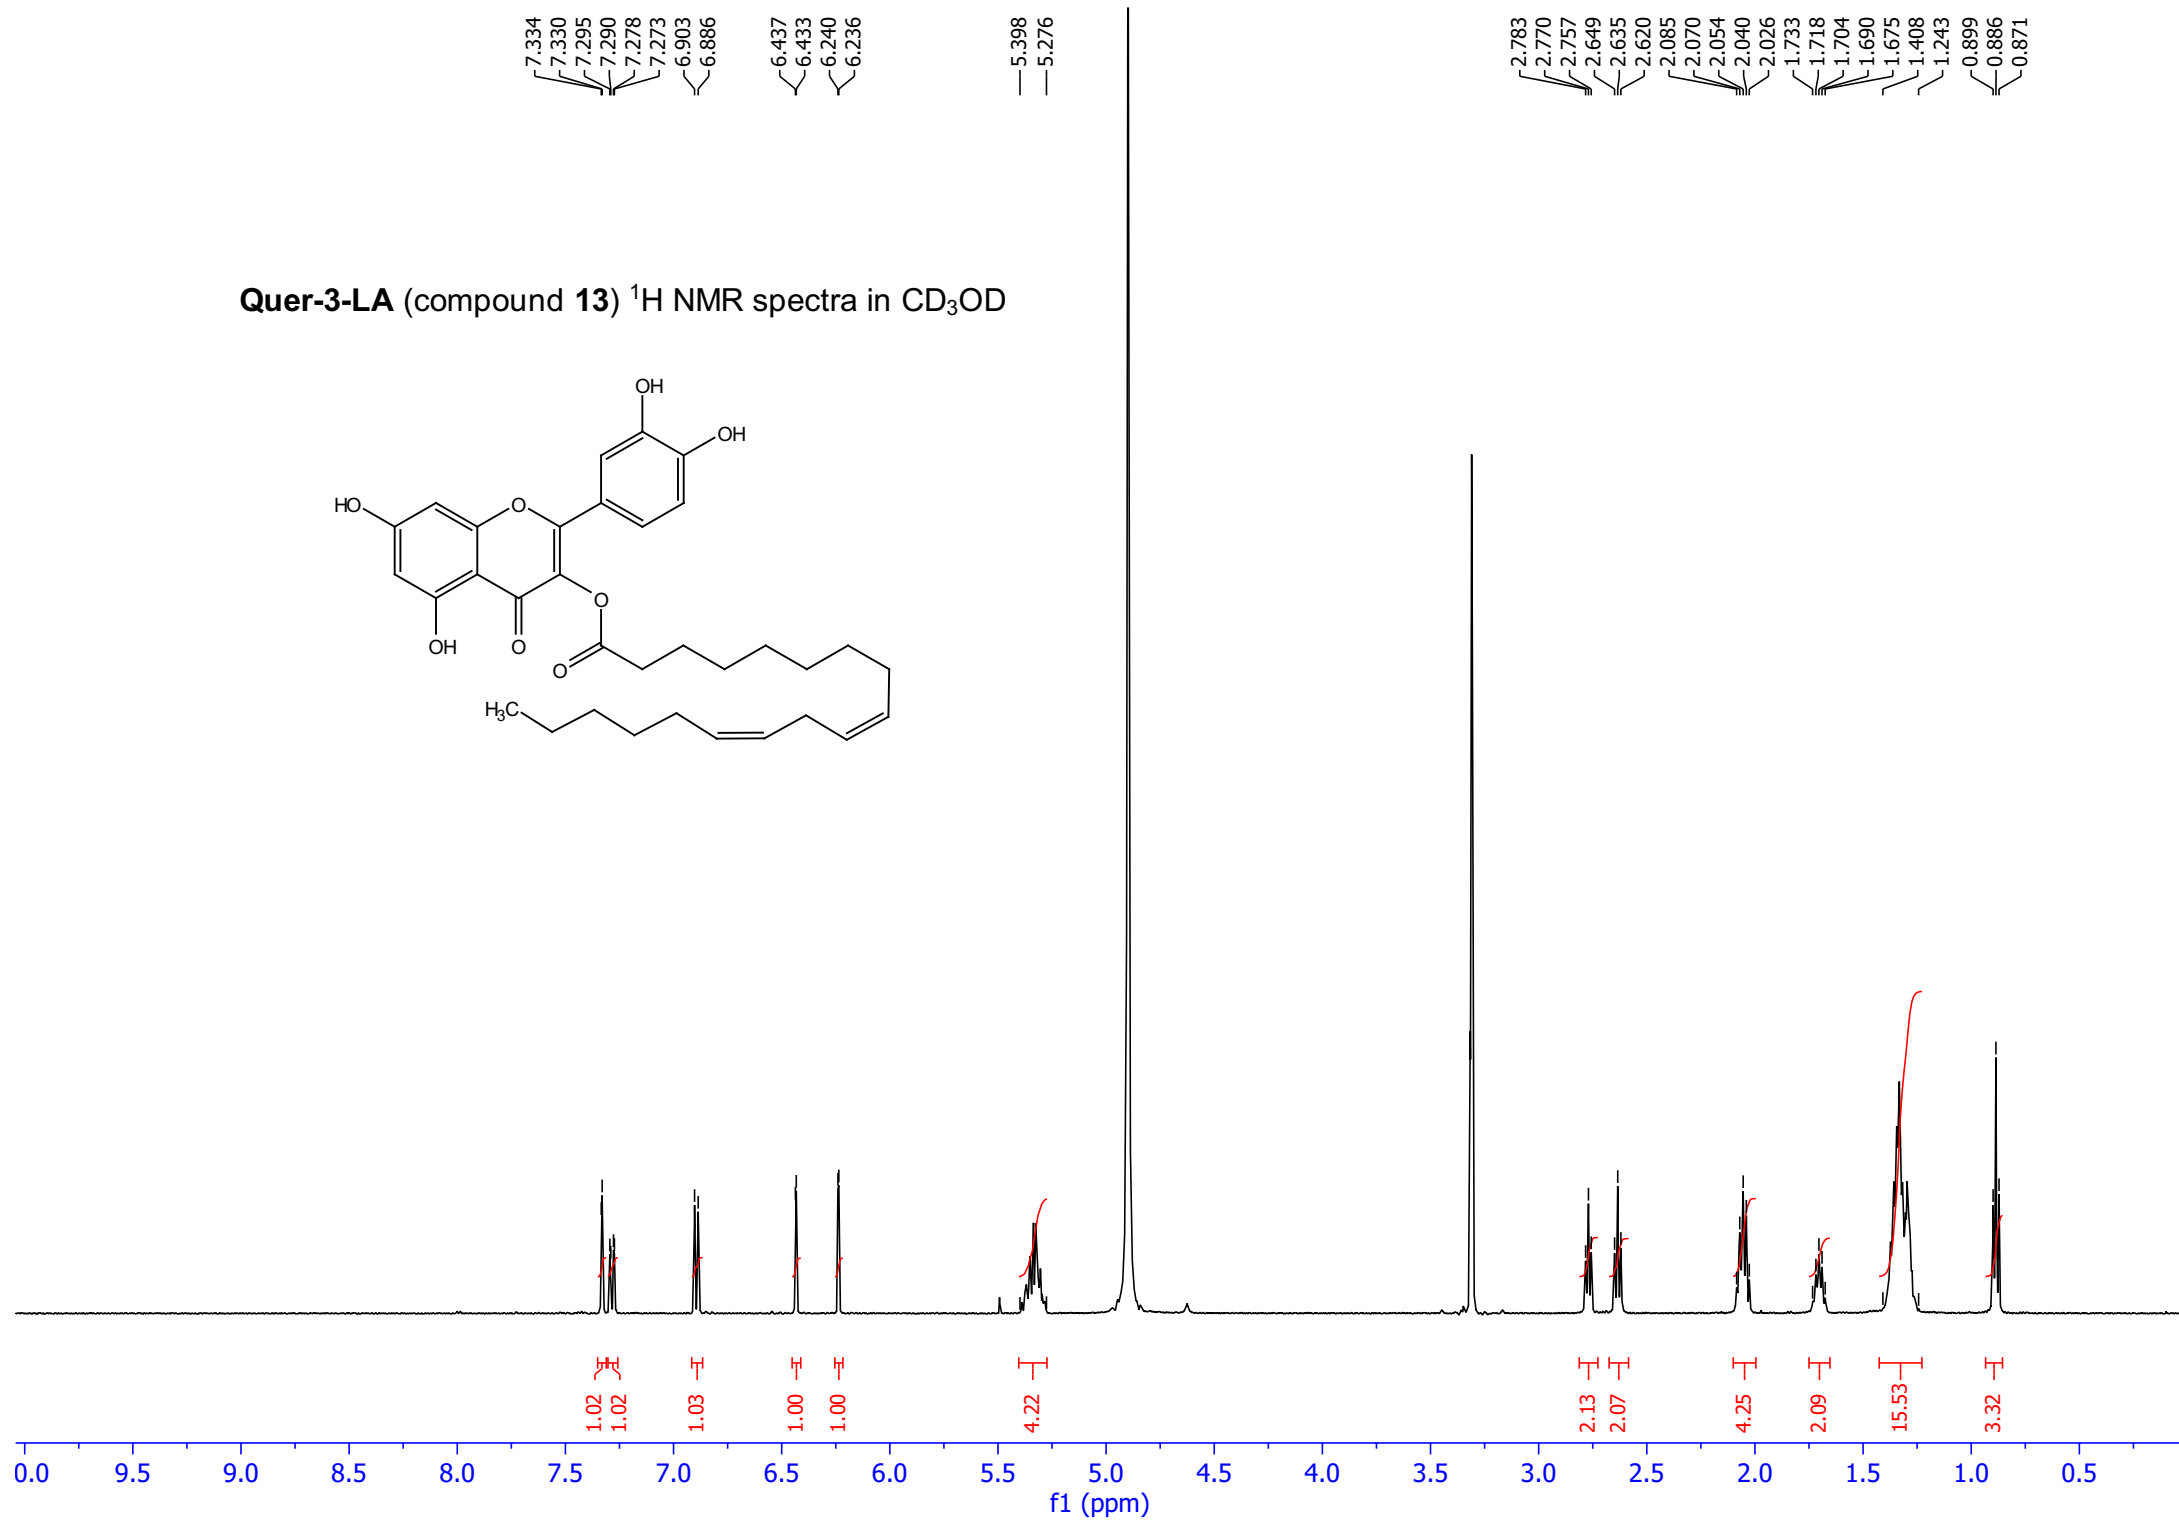

— 177.217  
 — 172.547  
 — 166.304  
 — 163.129  
 — 158.682  
 — 158.446  
 — 150.365  
 — 146.644  
 — 131.434  
 — 130.913  
 — 130.901  
 — 129.068  
 — 129.057  
 — 122.128  
 — 121.969  
 — 116.453  
 — 116.177  
 — 105.266  
 — 100.139  
 — 95.033  
 — 34.613  
 — 32.652  
 — 30.626  
 — 30.475  
 — 30.193  
 — 30.132  
 — 29.982  
 — 28.147  
 — 28.121  
 — 26.526  
 — 25.799  
 — 23.628  
 — 14.424

Quer-3-LA (compound 13) <sup>13</sup>C Jmod NMR spectra in CD<sub>3</sub>OD

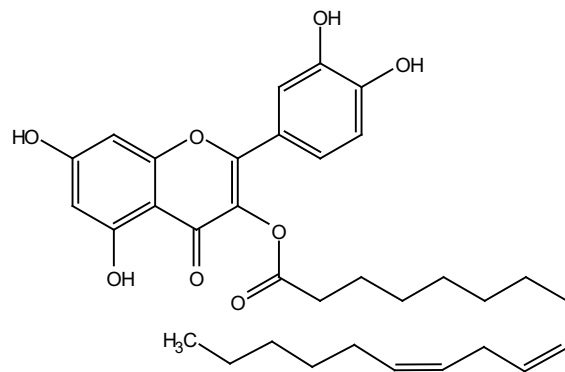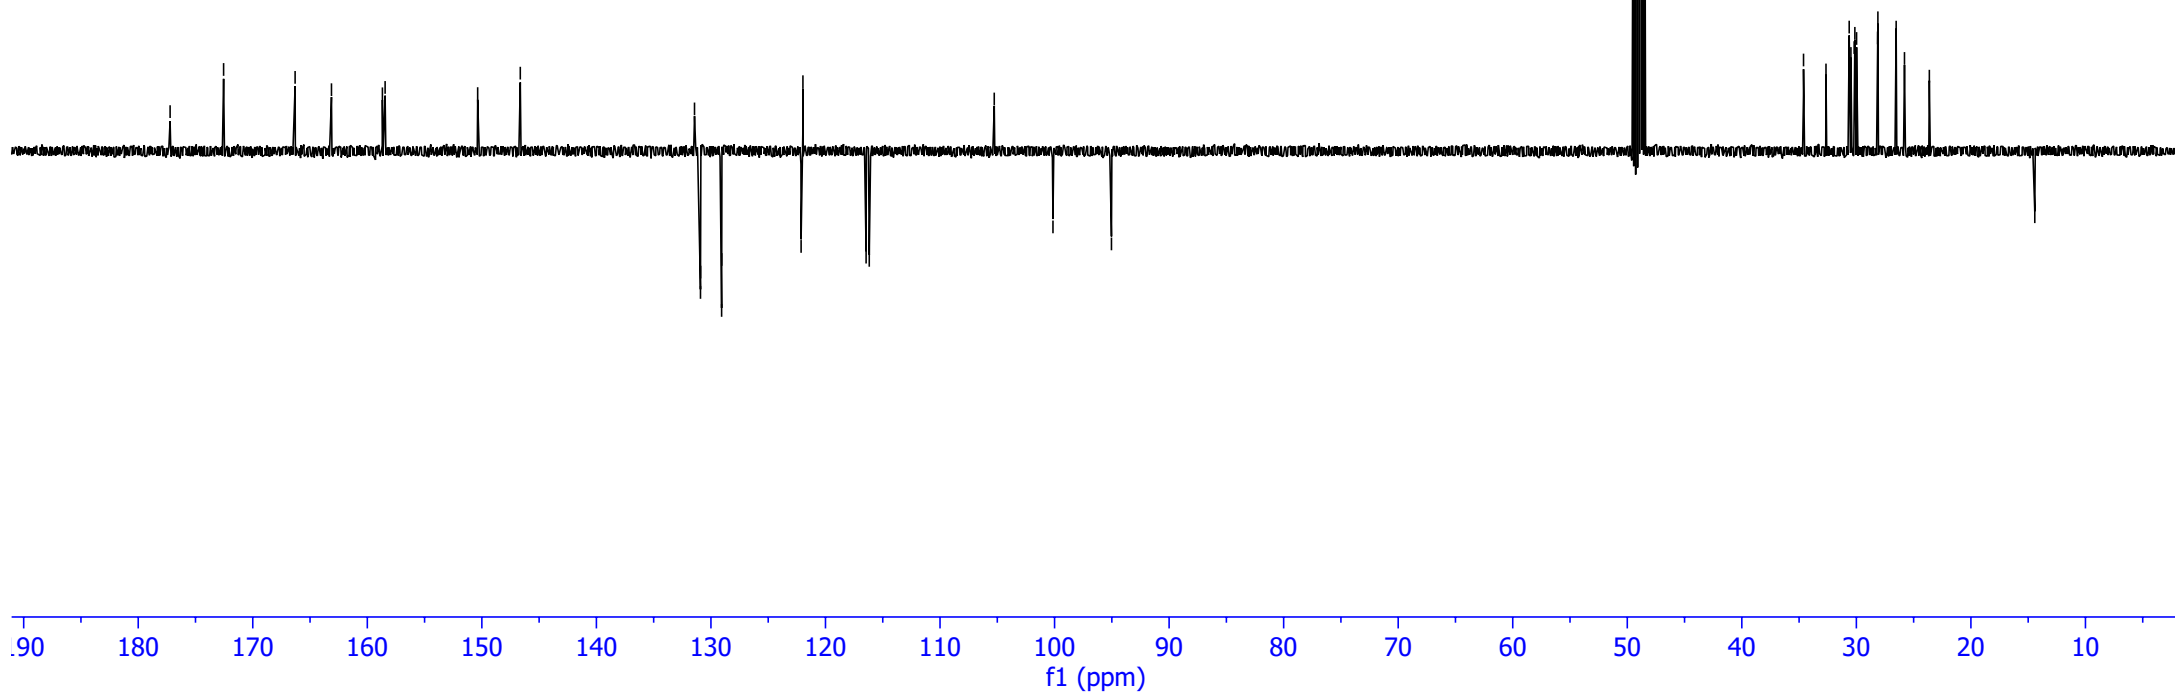

7.332  
7.328  
7.288  
7.284  
7.272  
7.267  
6.899  
6.883

6.428  
6.424  
6.235  
6.231

— 5.415  
— 5.239

2.839  
2.748  
2.642  
2.627  
2.613  
2.095  
2.077  
2.064  
2.050  
2.035  
1.727  
1.713  
1.699  
1.685  
1.670  
1.411  
1.265  
0.966  
0.951  
0.936

Quer-3-ALA (compound 14) <sup>1</sup>H NMR spectra in CD<sub>3</sub>OD

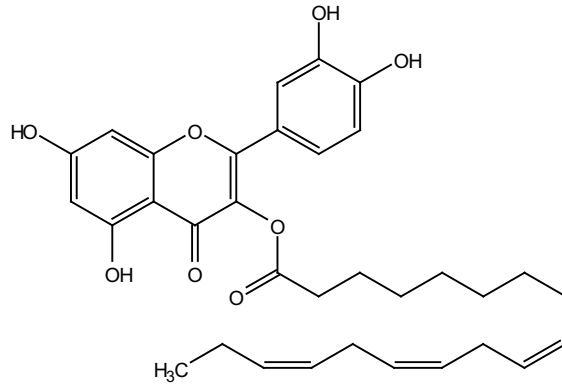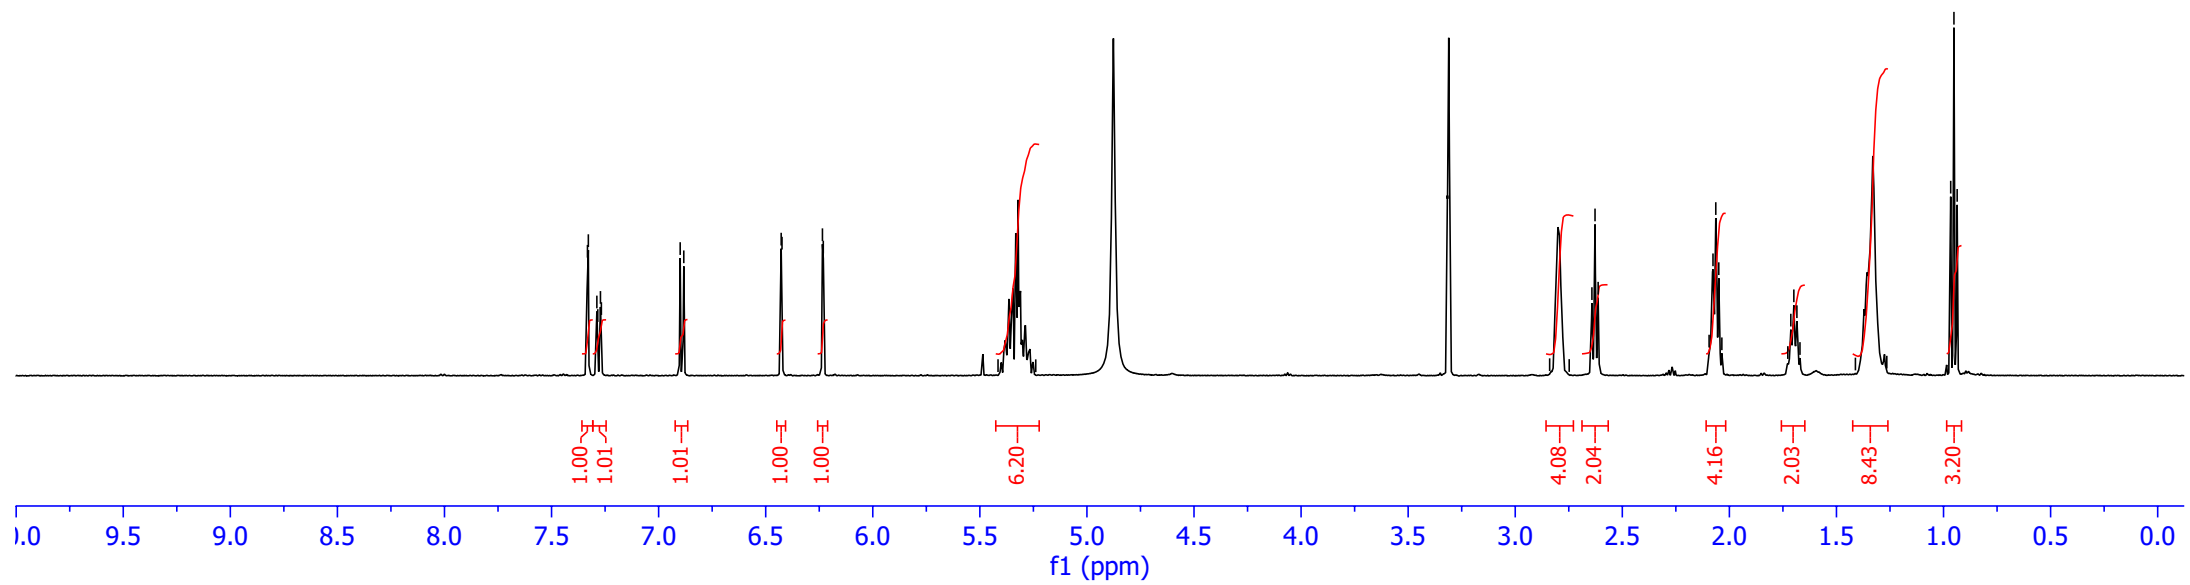

— 177.209  
— 172.564  
~ 166.257  
~ 163.121  
~ 158.670  
~ 158.422

— 150.350  
— 146.634  
- 132.706  
- 131.452  
- 131.127  
- 129.231  
- 129.166  
- 128.819  
- 128.233  
- 122.156  
- 121.993  
- 116.458  
- 116.197

— 105.297  
— 100.143  
— 95.046

34.629  
30.627  
30.205  
30.142  
29.996  
28.144  
26.515  
26.396  
25.806  
21.476  
— 14.656

Quer-3-ALA (compound 14) <sup>13</sup>C Jmod NMR spectra in CD<sub>3</sub>OD

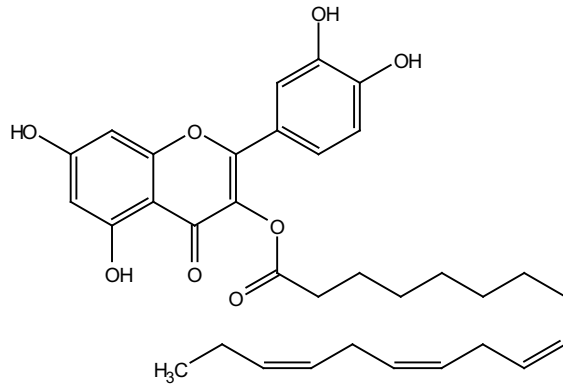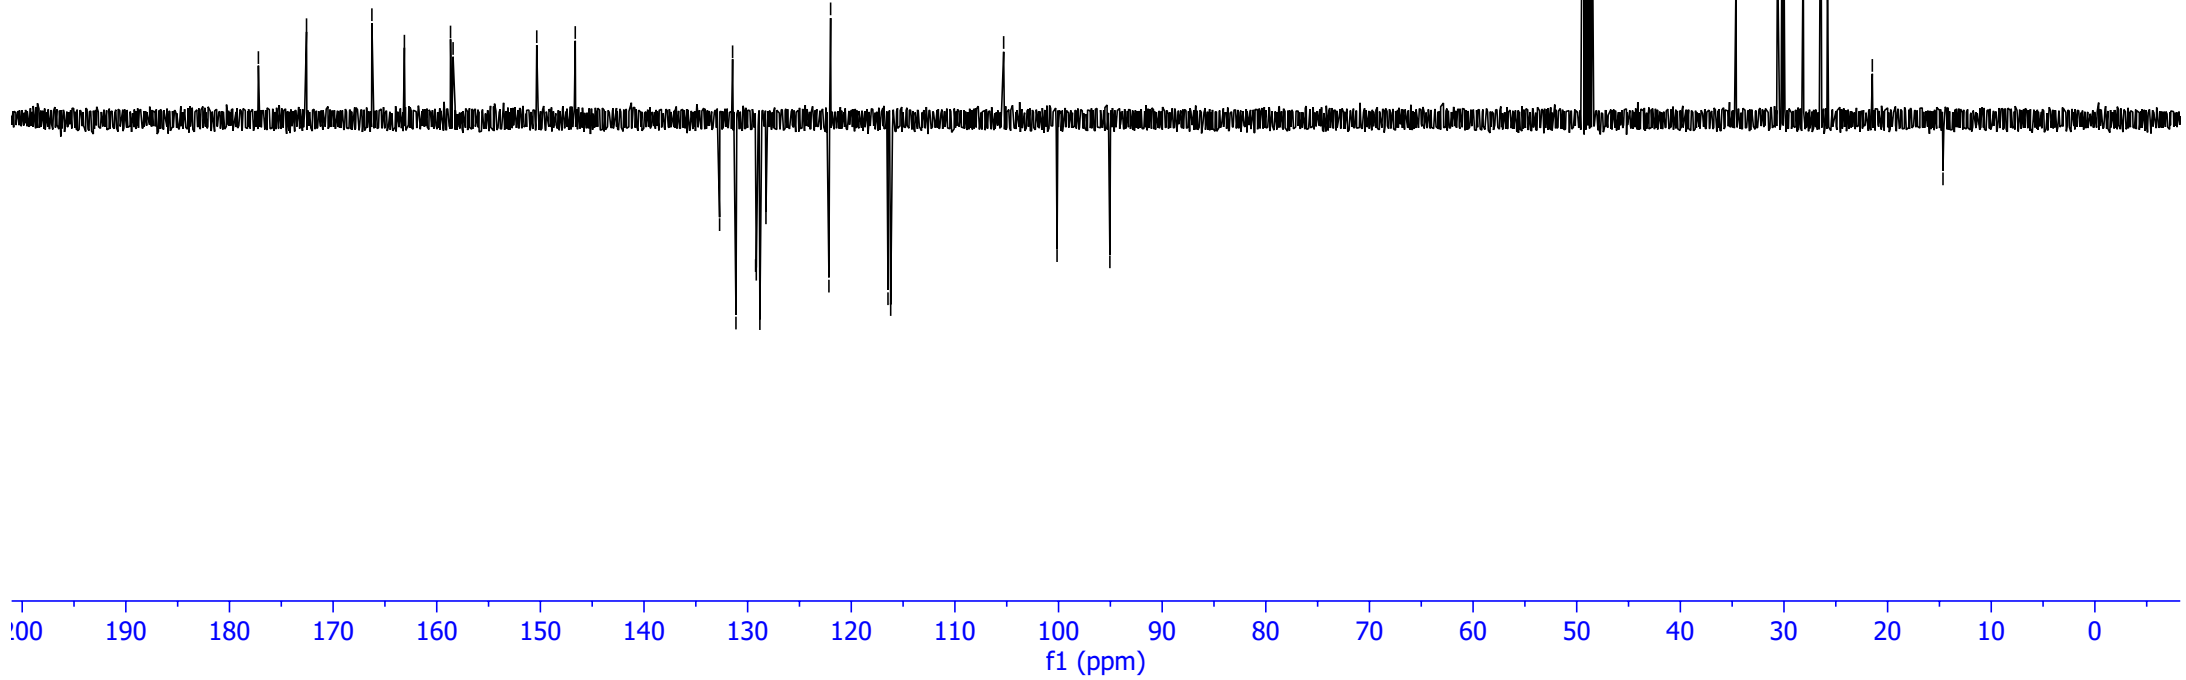

Quer-3-DHA (compound 15) <sup>1</sup>H NMR spectra in CD<sub>3</sub>OD

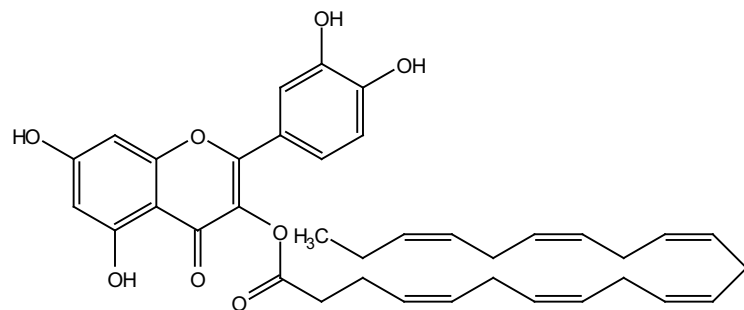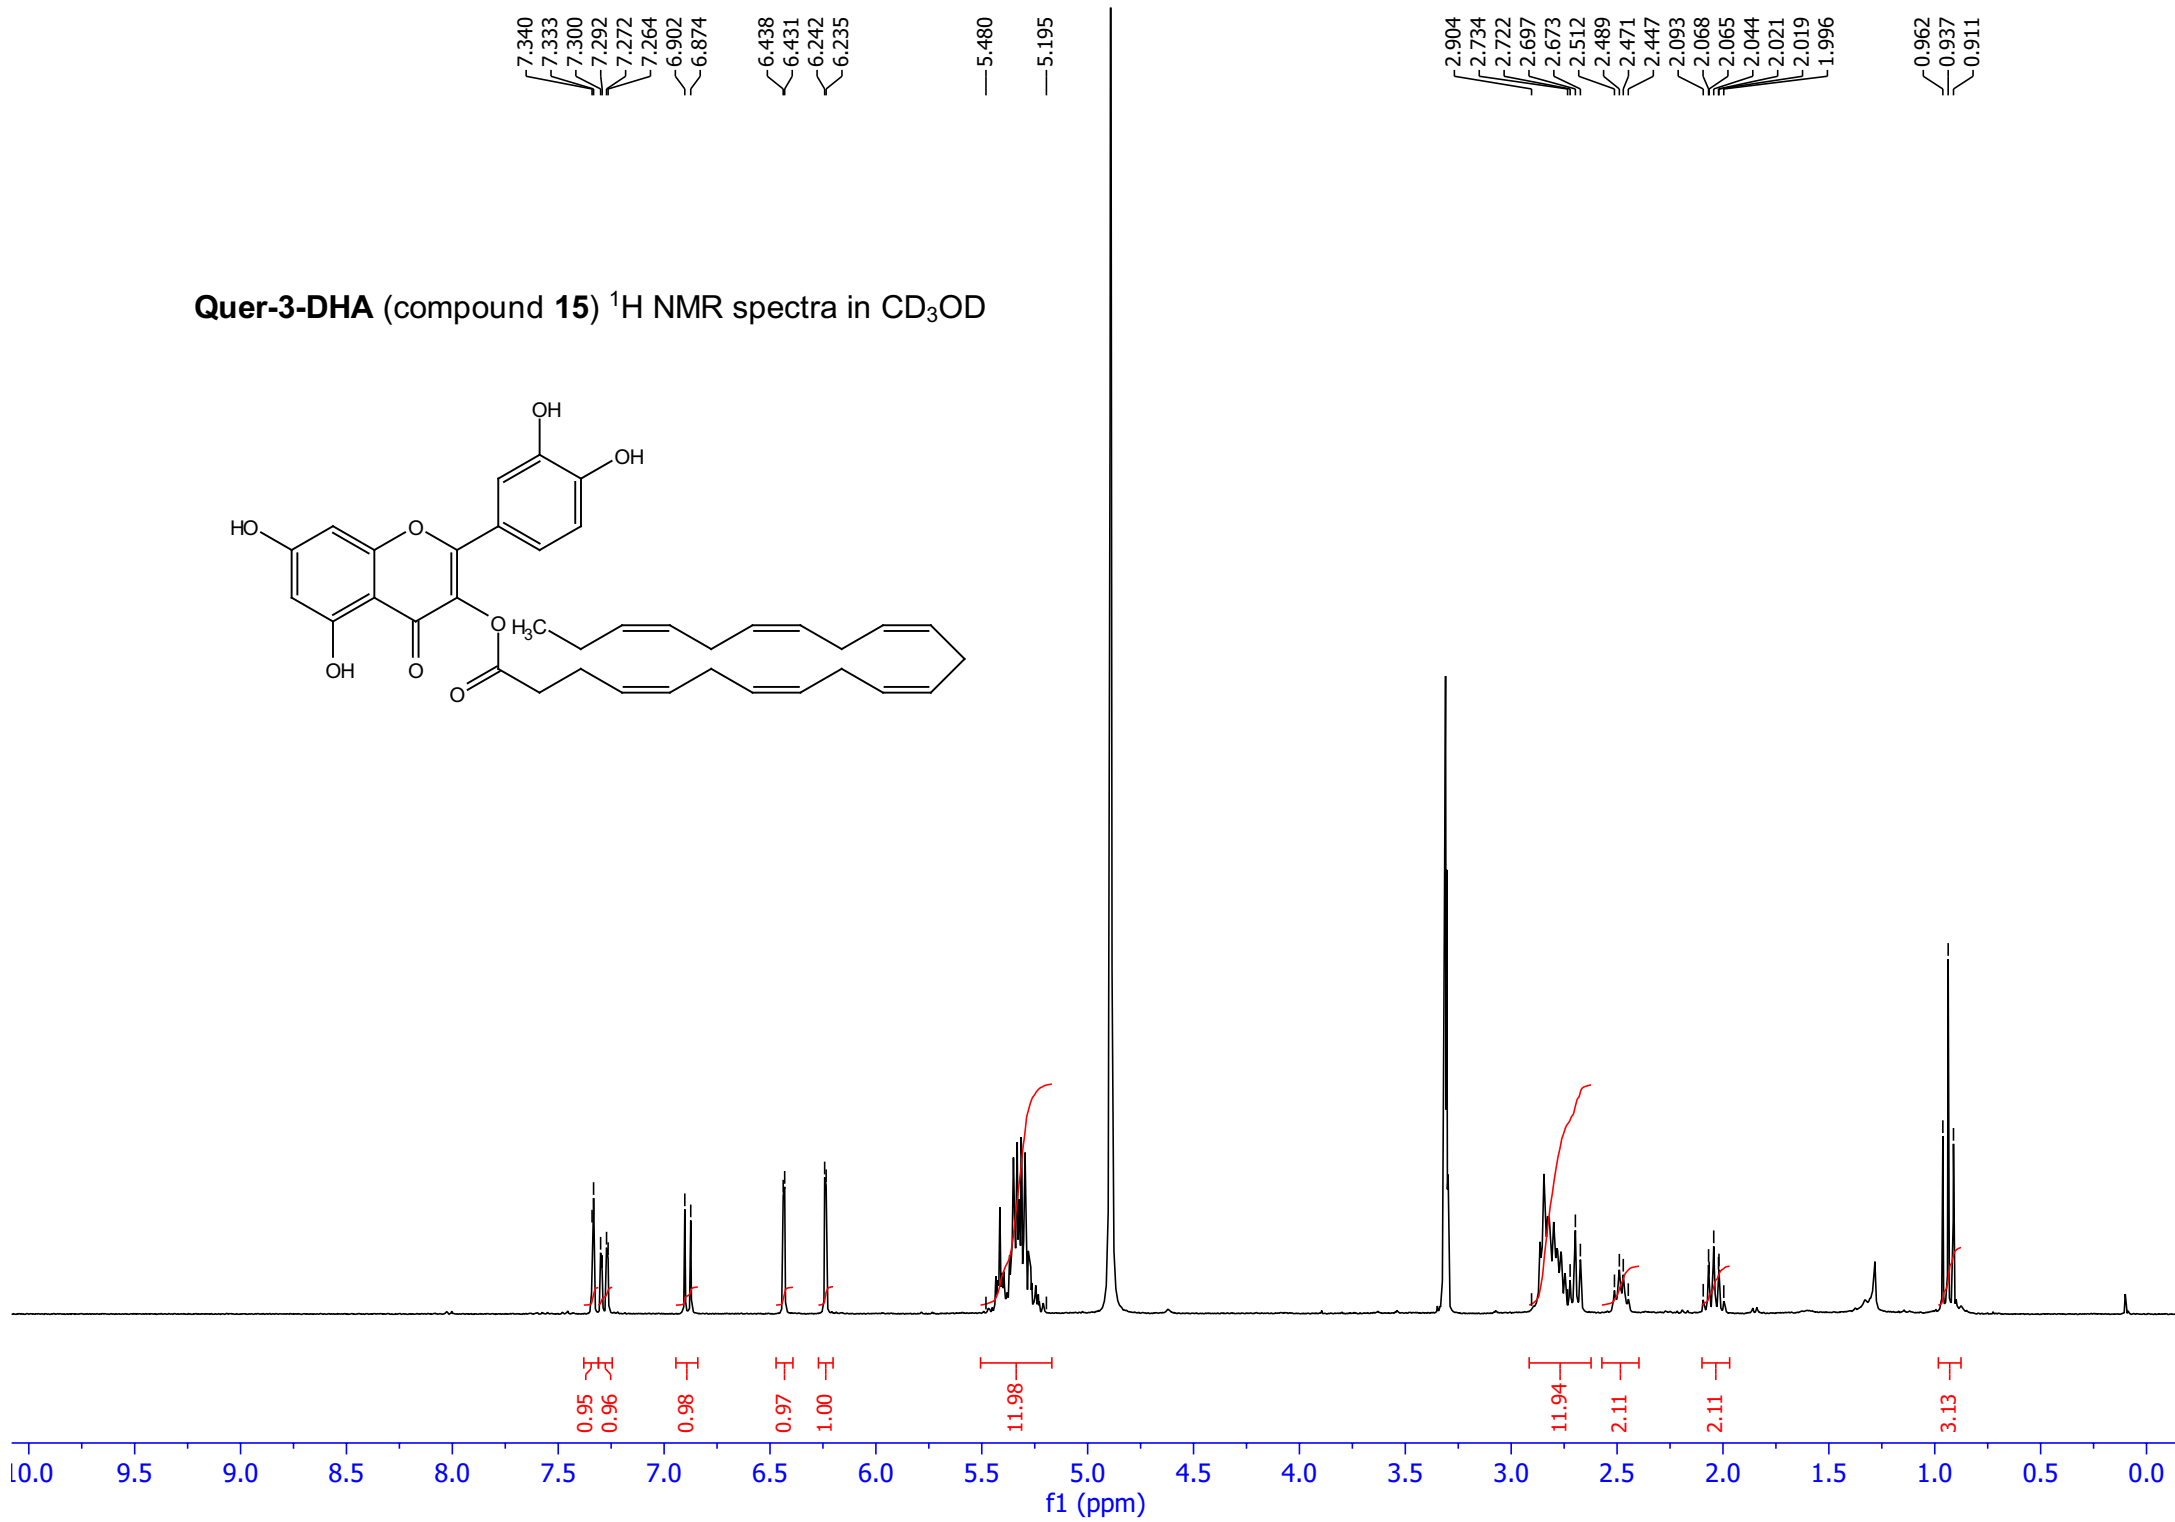

Quer-3-DHA (compound **15**)  $^{13}\text{C}$  Jmod NMR spectra in  $\text{CD}_3\text{OD}$

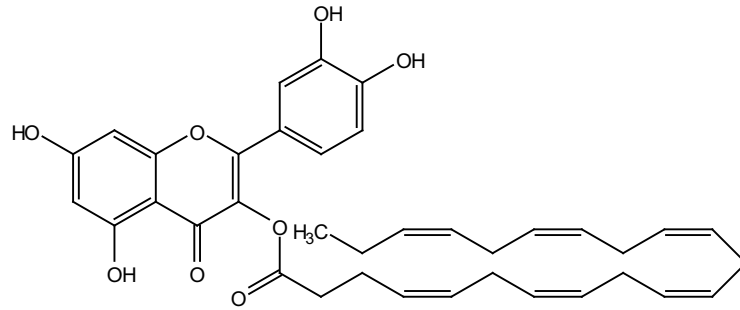

— 177.148  
— 171.953  
— 166.272  
— 163.126  
— 158.671  
— 158.384  
— 150.376  
— 146.669  
— 132.731  
— 131.457  
— 130.606  
— 129.378  
— 129.118  
— 129.059  
— 128.892  
— 128.675  
— 128.177  
— 122.187  
— 121.958  
— 116.469  
— 116.197

— 105.298  
— 100.142  
— 95.040

— 34.681  
— 26.554  
— 26.390  
— 23.669  
— 21.463  
— 14.646

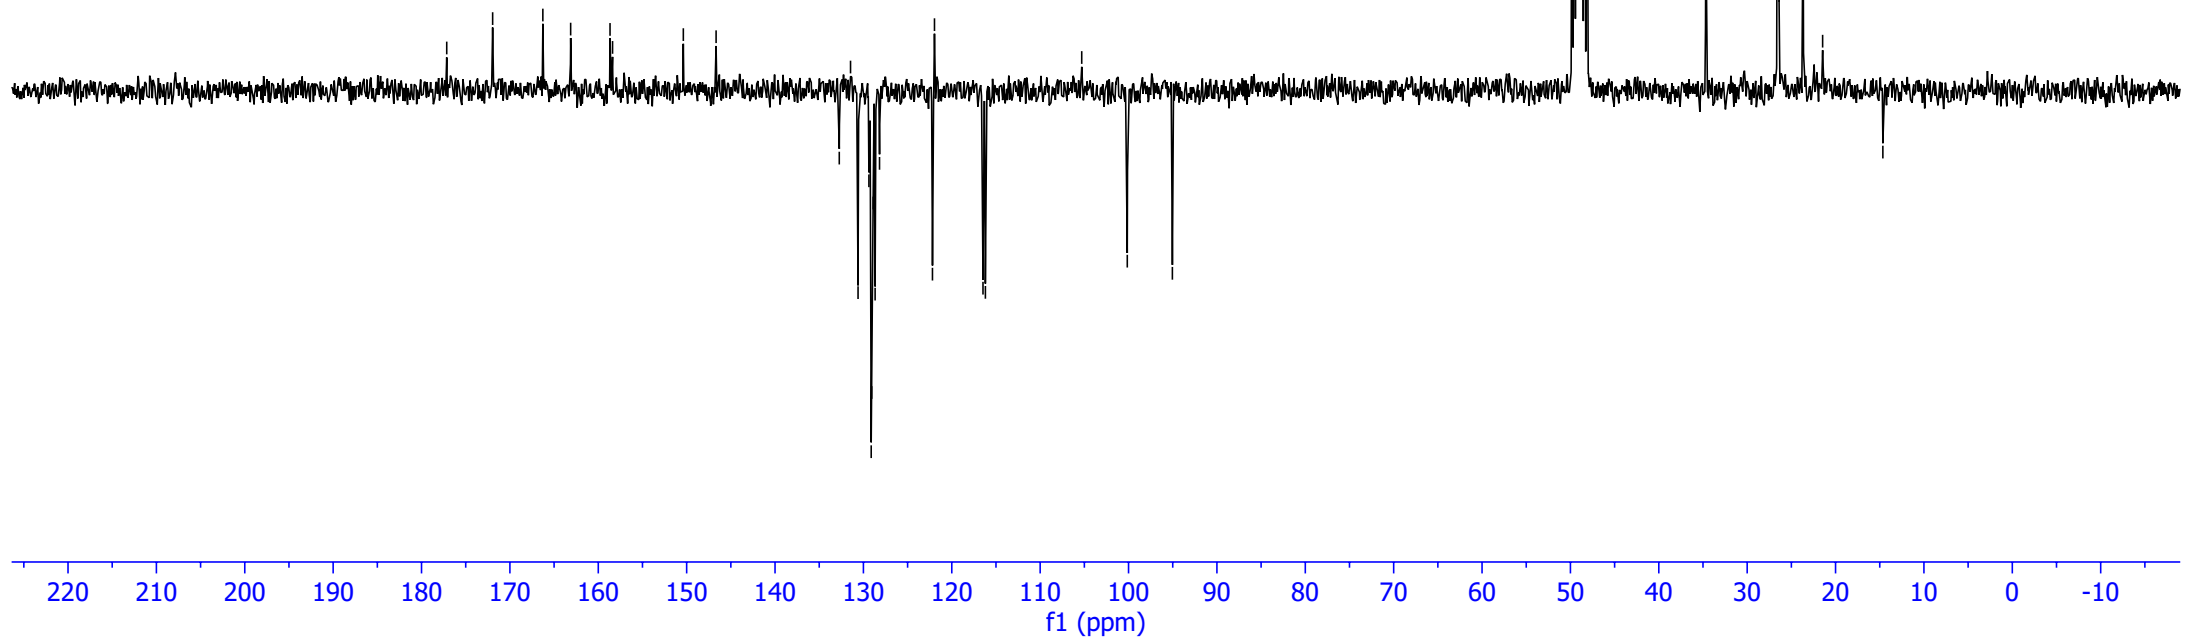

7.478  
7.470  
7.449  
7.442  
7.339  
7.332  
6.913  
6.885

6.359  
6.352  
6.272  
6.265

1.826

0.999  
0.994  
0.833

0.231  
0.203  
0.108

Compound **16** <sup>1</sup>H NMR spectra in CDCl<sub>3</sub>

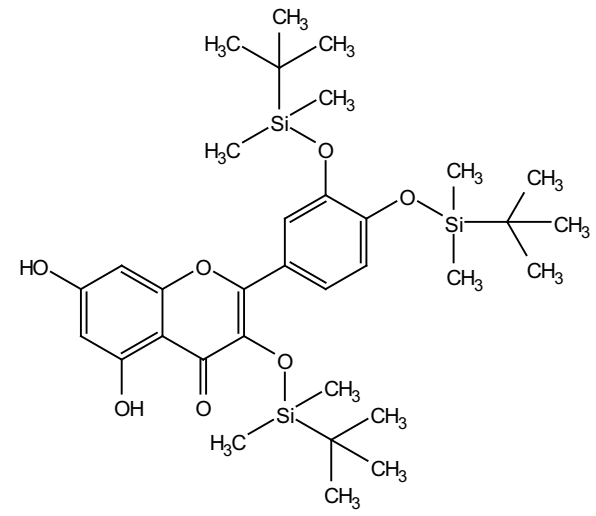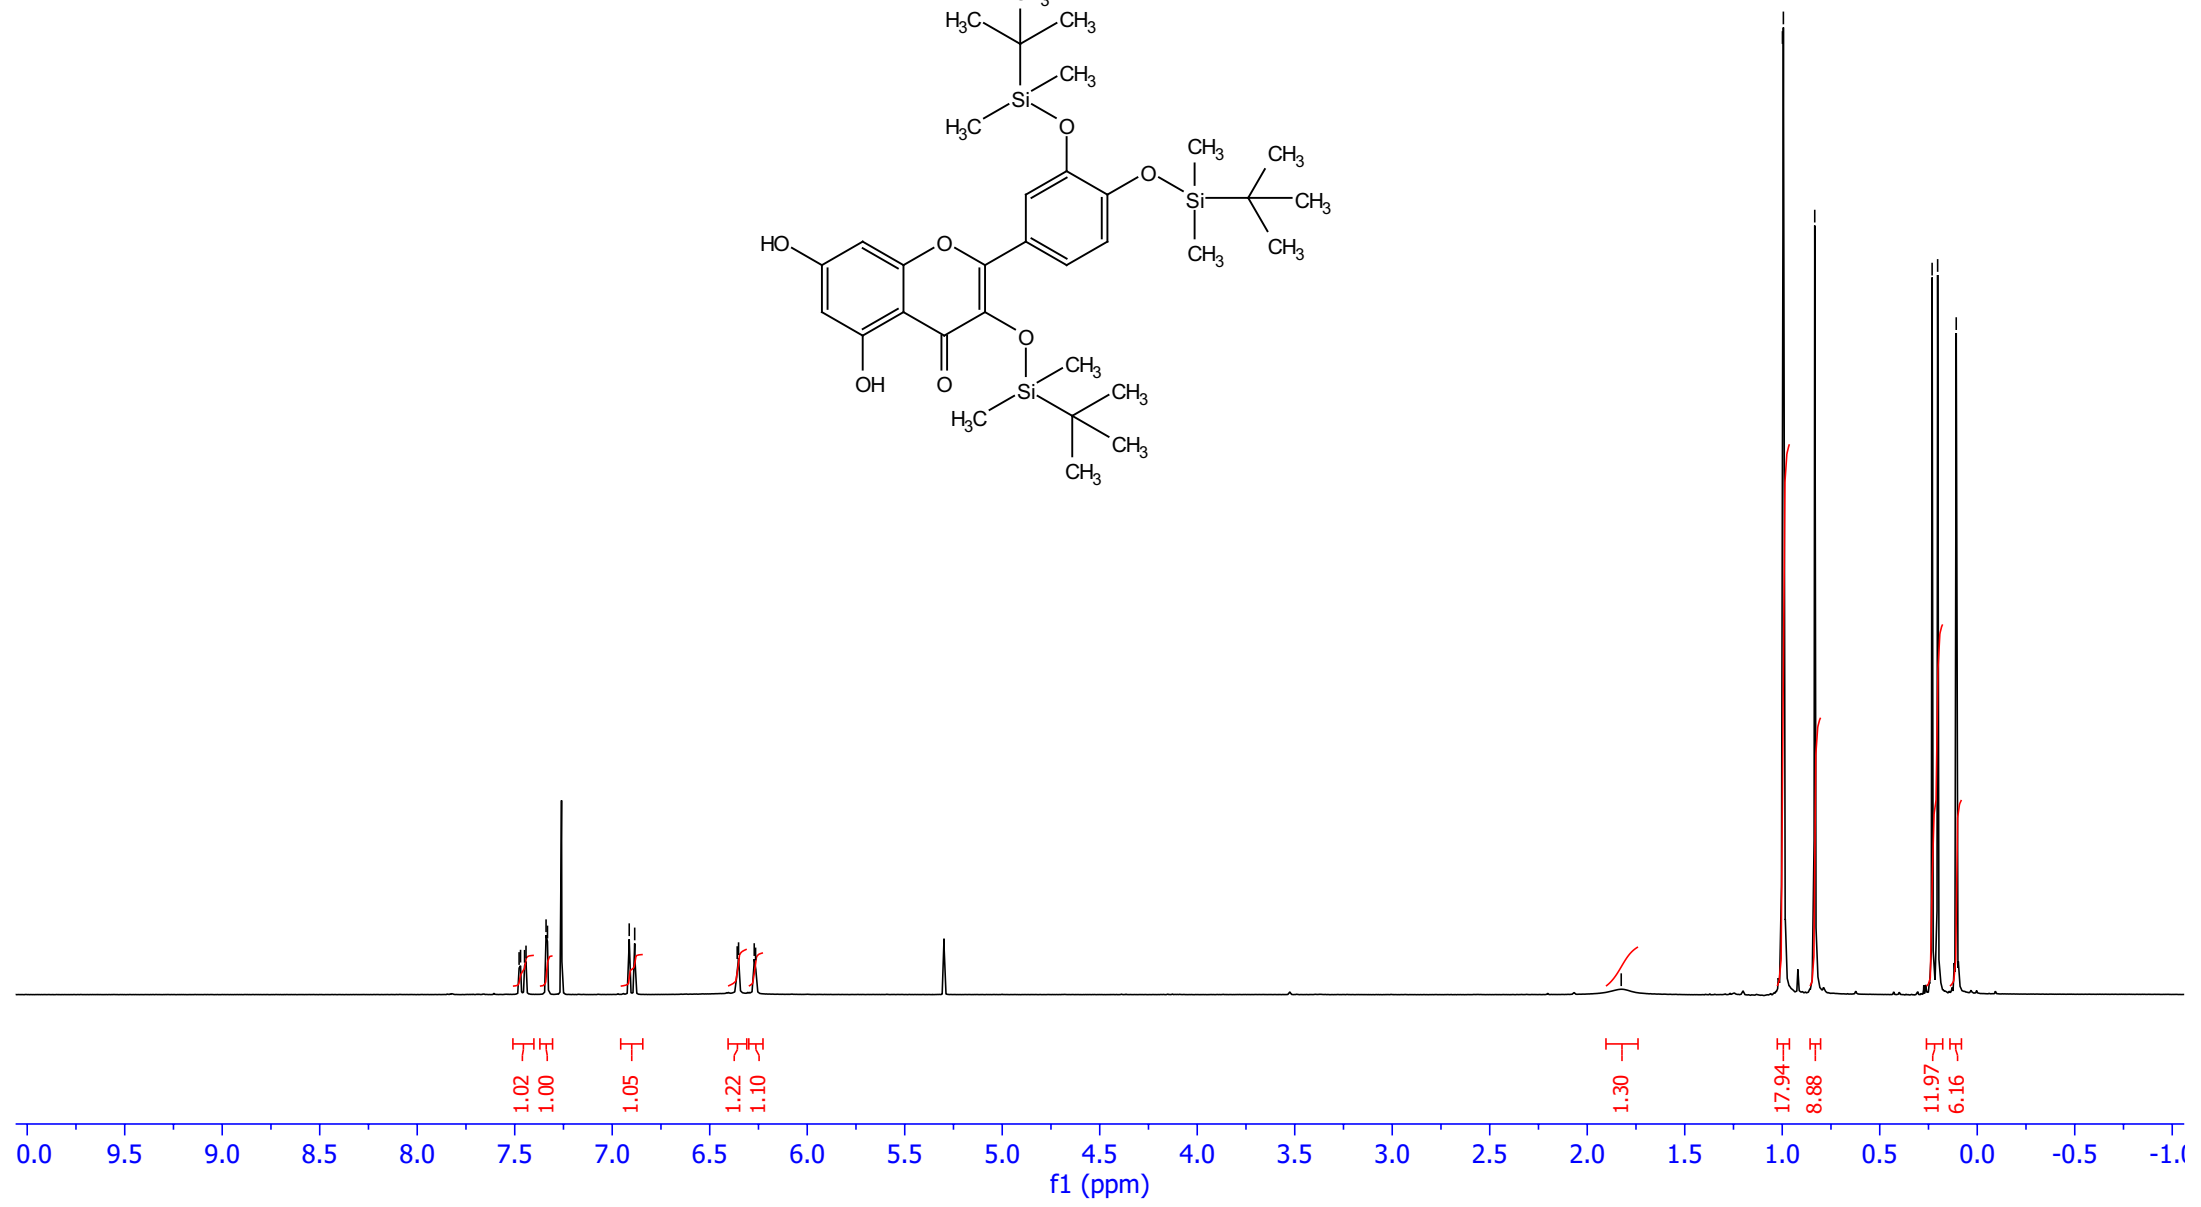

— 178.170

— 162.178  
— 162.060

— 156.759  
— 153.183  
— 149.220  
— 146.783

— 135.556

— 124.401  
— 123.271  
— 121.623  
— 120.775

— 105.471

— 98.609

— 93.652

— 25.929  
— 25.913  
— 25.686  
— 18.581  
— 18.575  
— 18.437

— 4.067  
— 4.114  
— 4.164

Compound **16**  $^{13}\text{C}$  Jmod NMR spectra in  $\text{CDCl}_3$

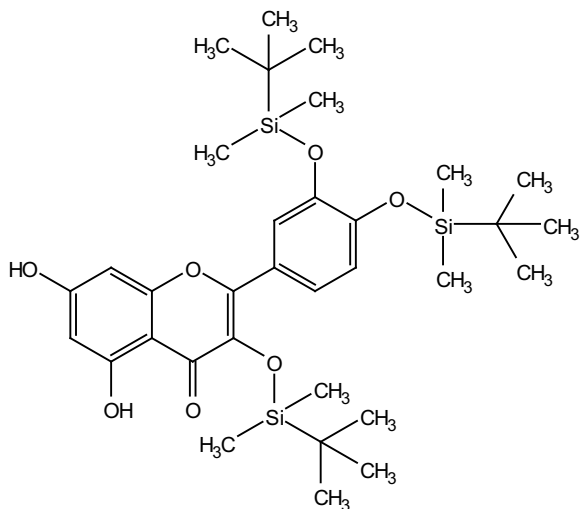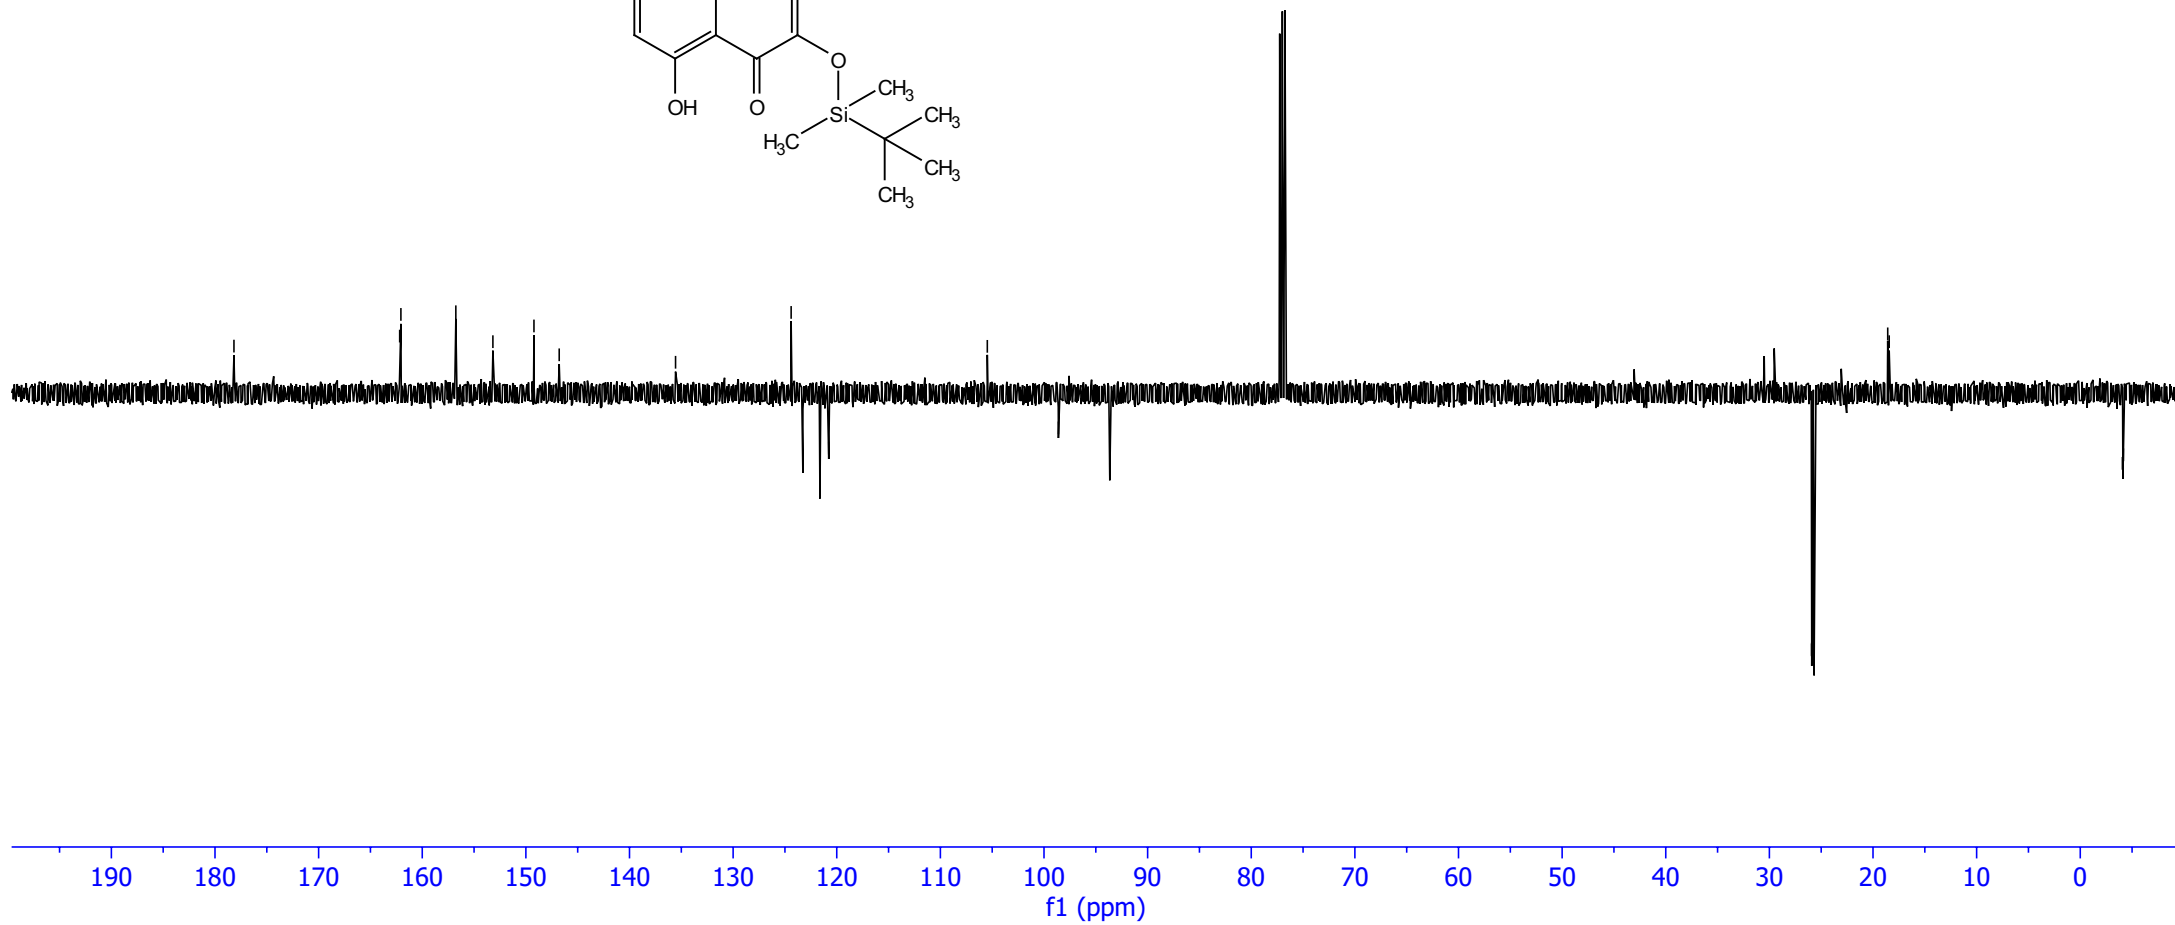





— 178.489

— 171.464

— 161.660

— 155.520

— 155.501

— 154.227

— 149.537

— 146.819

— 135.981

— 131.952

— 130.200

— 128.278

— 128.216

— 127.767

— 127.083

— 123.989

— 123.369

— 121.747

— 120.833

— 108.837

— 104.276

— 100.656

— 34.377

— 29.549

— 29.129

— 29.066

— 29.012

— 27.172

— 25.915

— 25.883

— 25.623

— 25.602

— 25.511

— 24.790

— 20.537

— 18.582

— 18.557

— 18.410

— 14.275

— 4.059

— 4.164

— 4.175

### Compound 17 <sup>13</sup>C Jmod NMR spectra in CDCl<sub>3</sub>

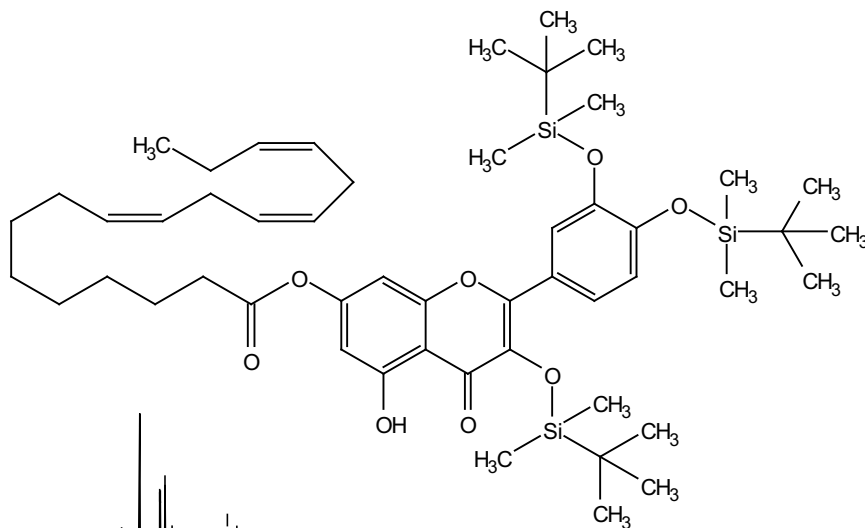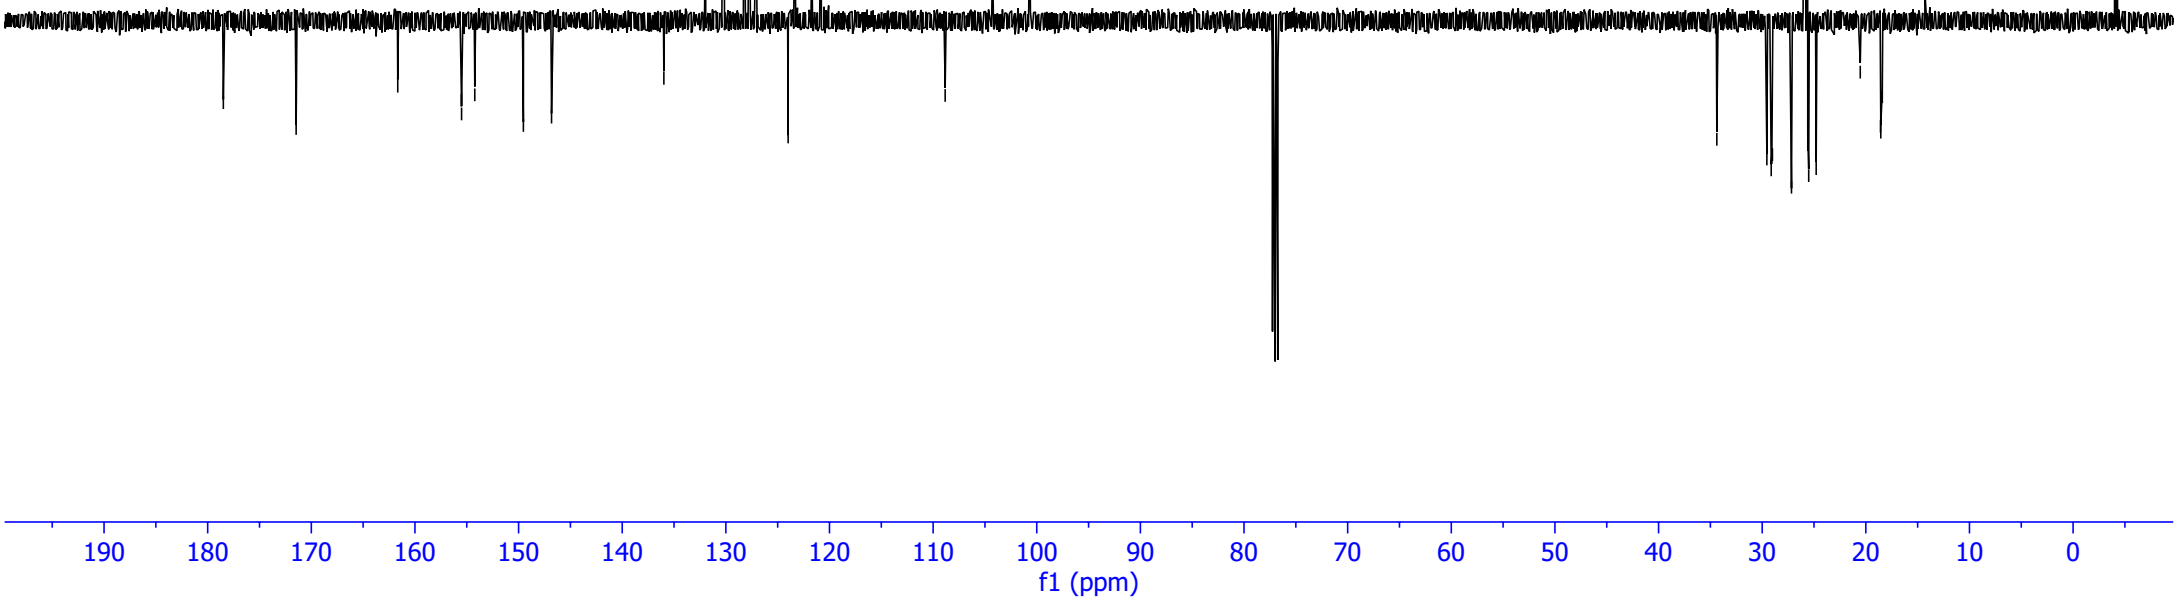

7.770  
7.767  
7.670  
7.666  
7.653  
7.649

6.891  
6.874  
6.812  
6.809  
6.460  
6.456

5.418  
5.237

2.812  
2.801  
2.790  
2.778  
2.600  
2.585  
2.570

2.114  
2.025  
1.752  
1.737  
1.723  
1.708  
1.693  
1.471  
1.333  
0.971  
0.956  
0.941

Quer-7-ALA (compound 18) <sup>1</sup>H NMR spectra in CD<sub>3</sub>OD

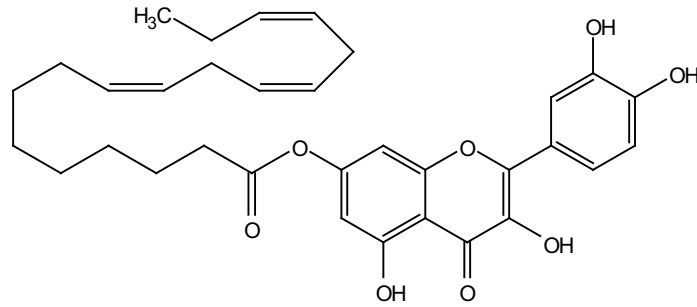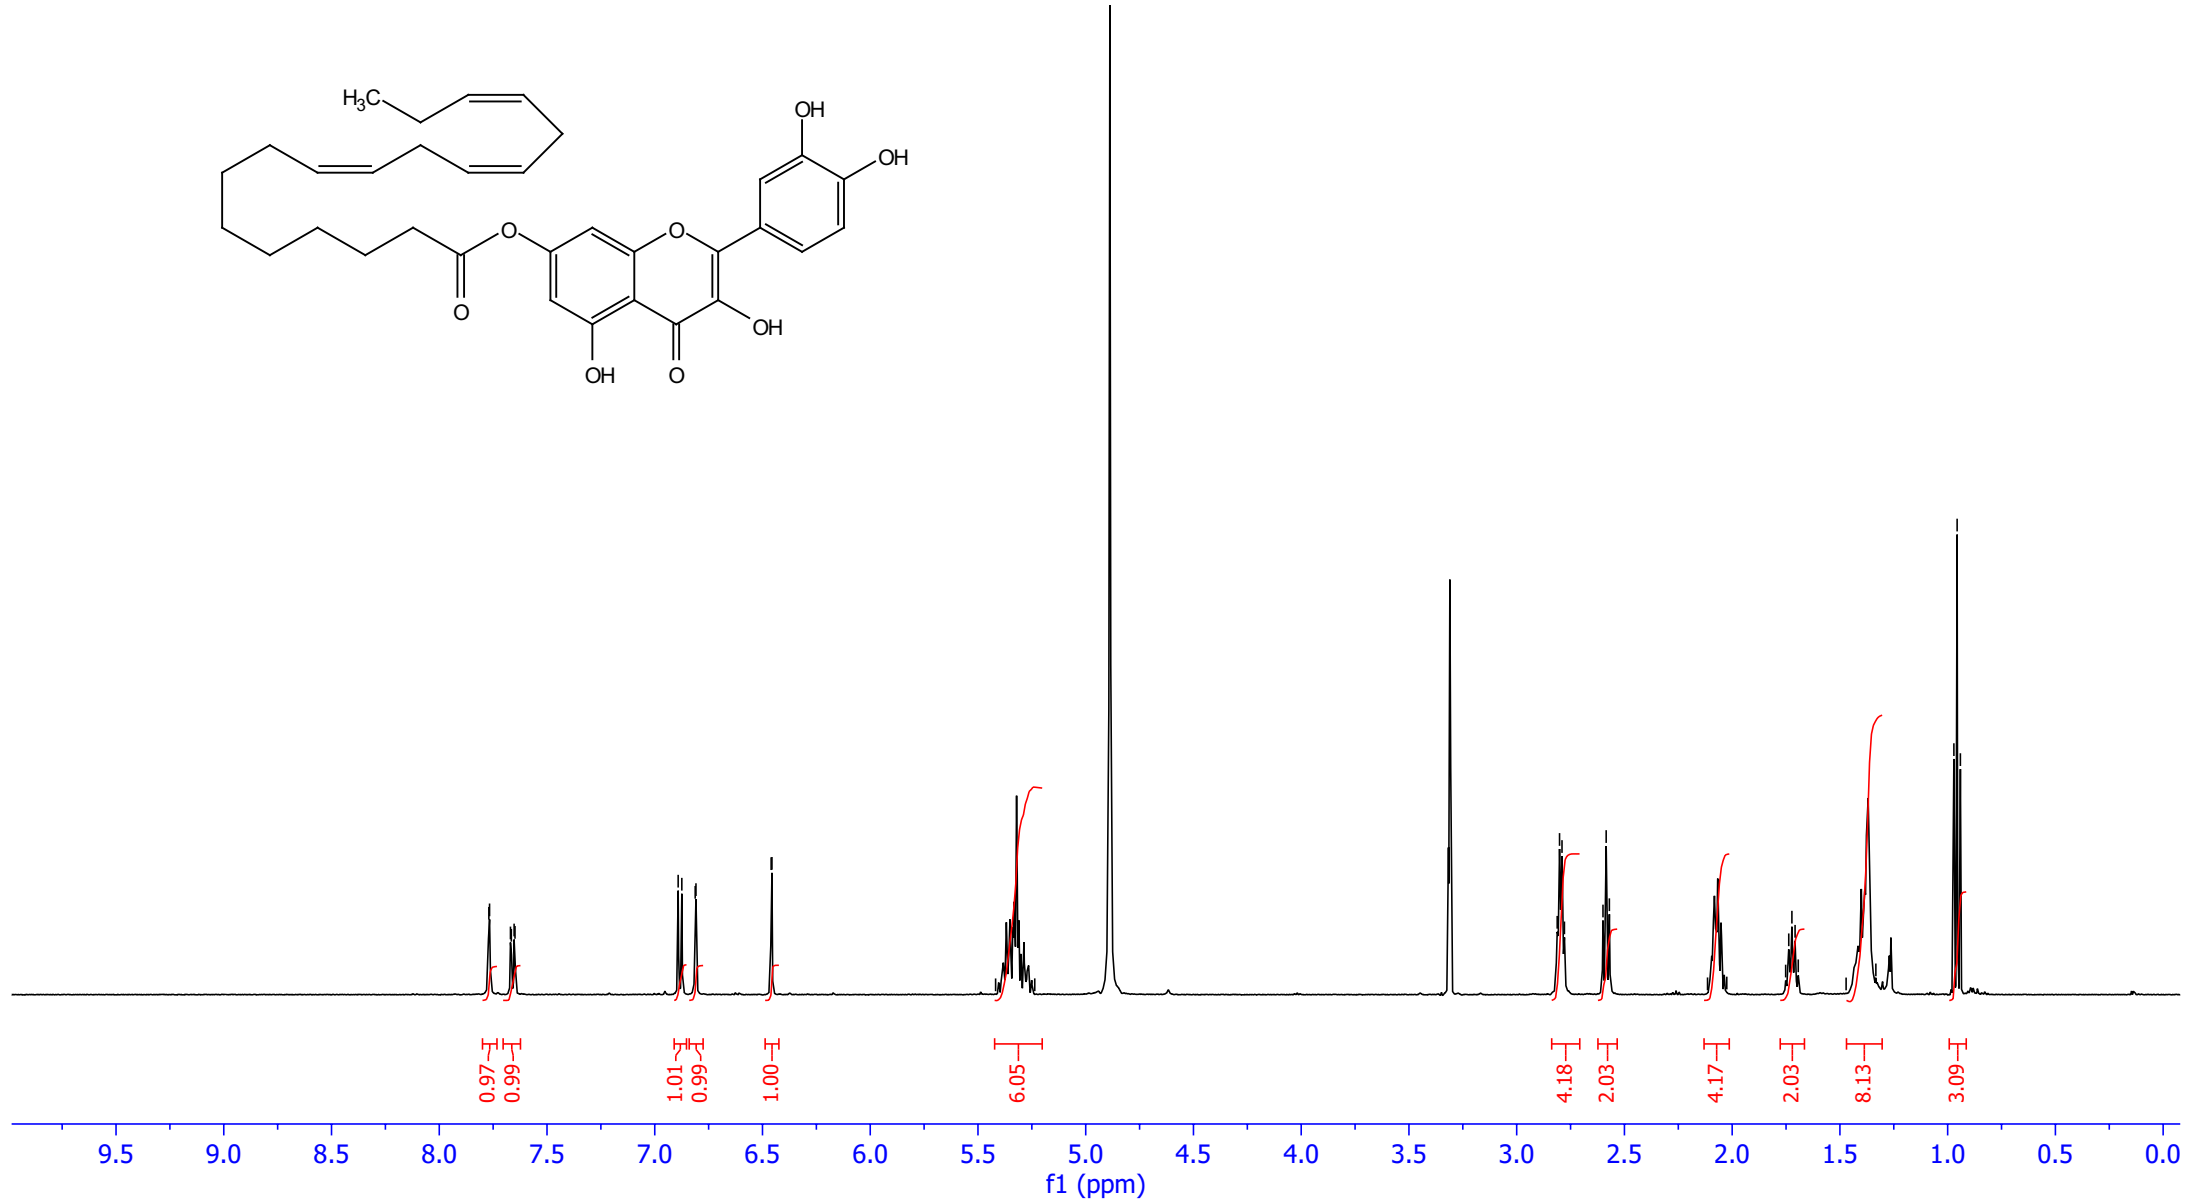

— 177.632  
— 172.839

— 161.969  
— 157.200  
— 156.761

— 149.321  
— 149.214  
— 146.264

— 138.035  
— 132.712  
— 131.049  
— 129.196  
— 129.180  
— 128.898  
— 128.229  
— 123.715  
— 122.015  
— 116.258  
— 116.232

— 108.500  
— 104.828  
— 101.870

— 35.017  
— 30.658  
— 30.231  
— 30.160  
— 30.090  
— 28.138  
— 26.523  
— 26.402  
— 25.799  
— 21.485  
— 14.671

Quer-7-ALA (compound 18) <sup>13</sup>C Jmod NMR spectra in CD<sub>3</sub>OD

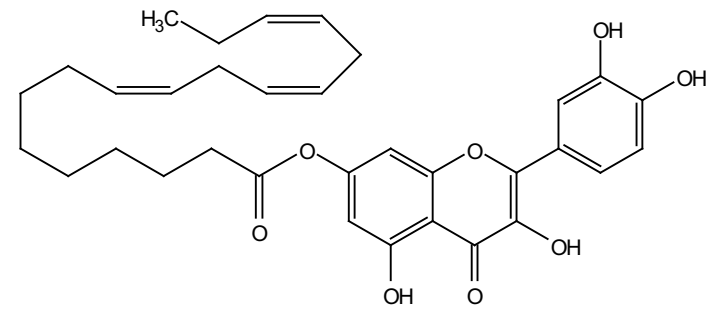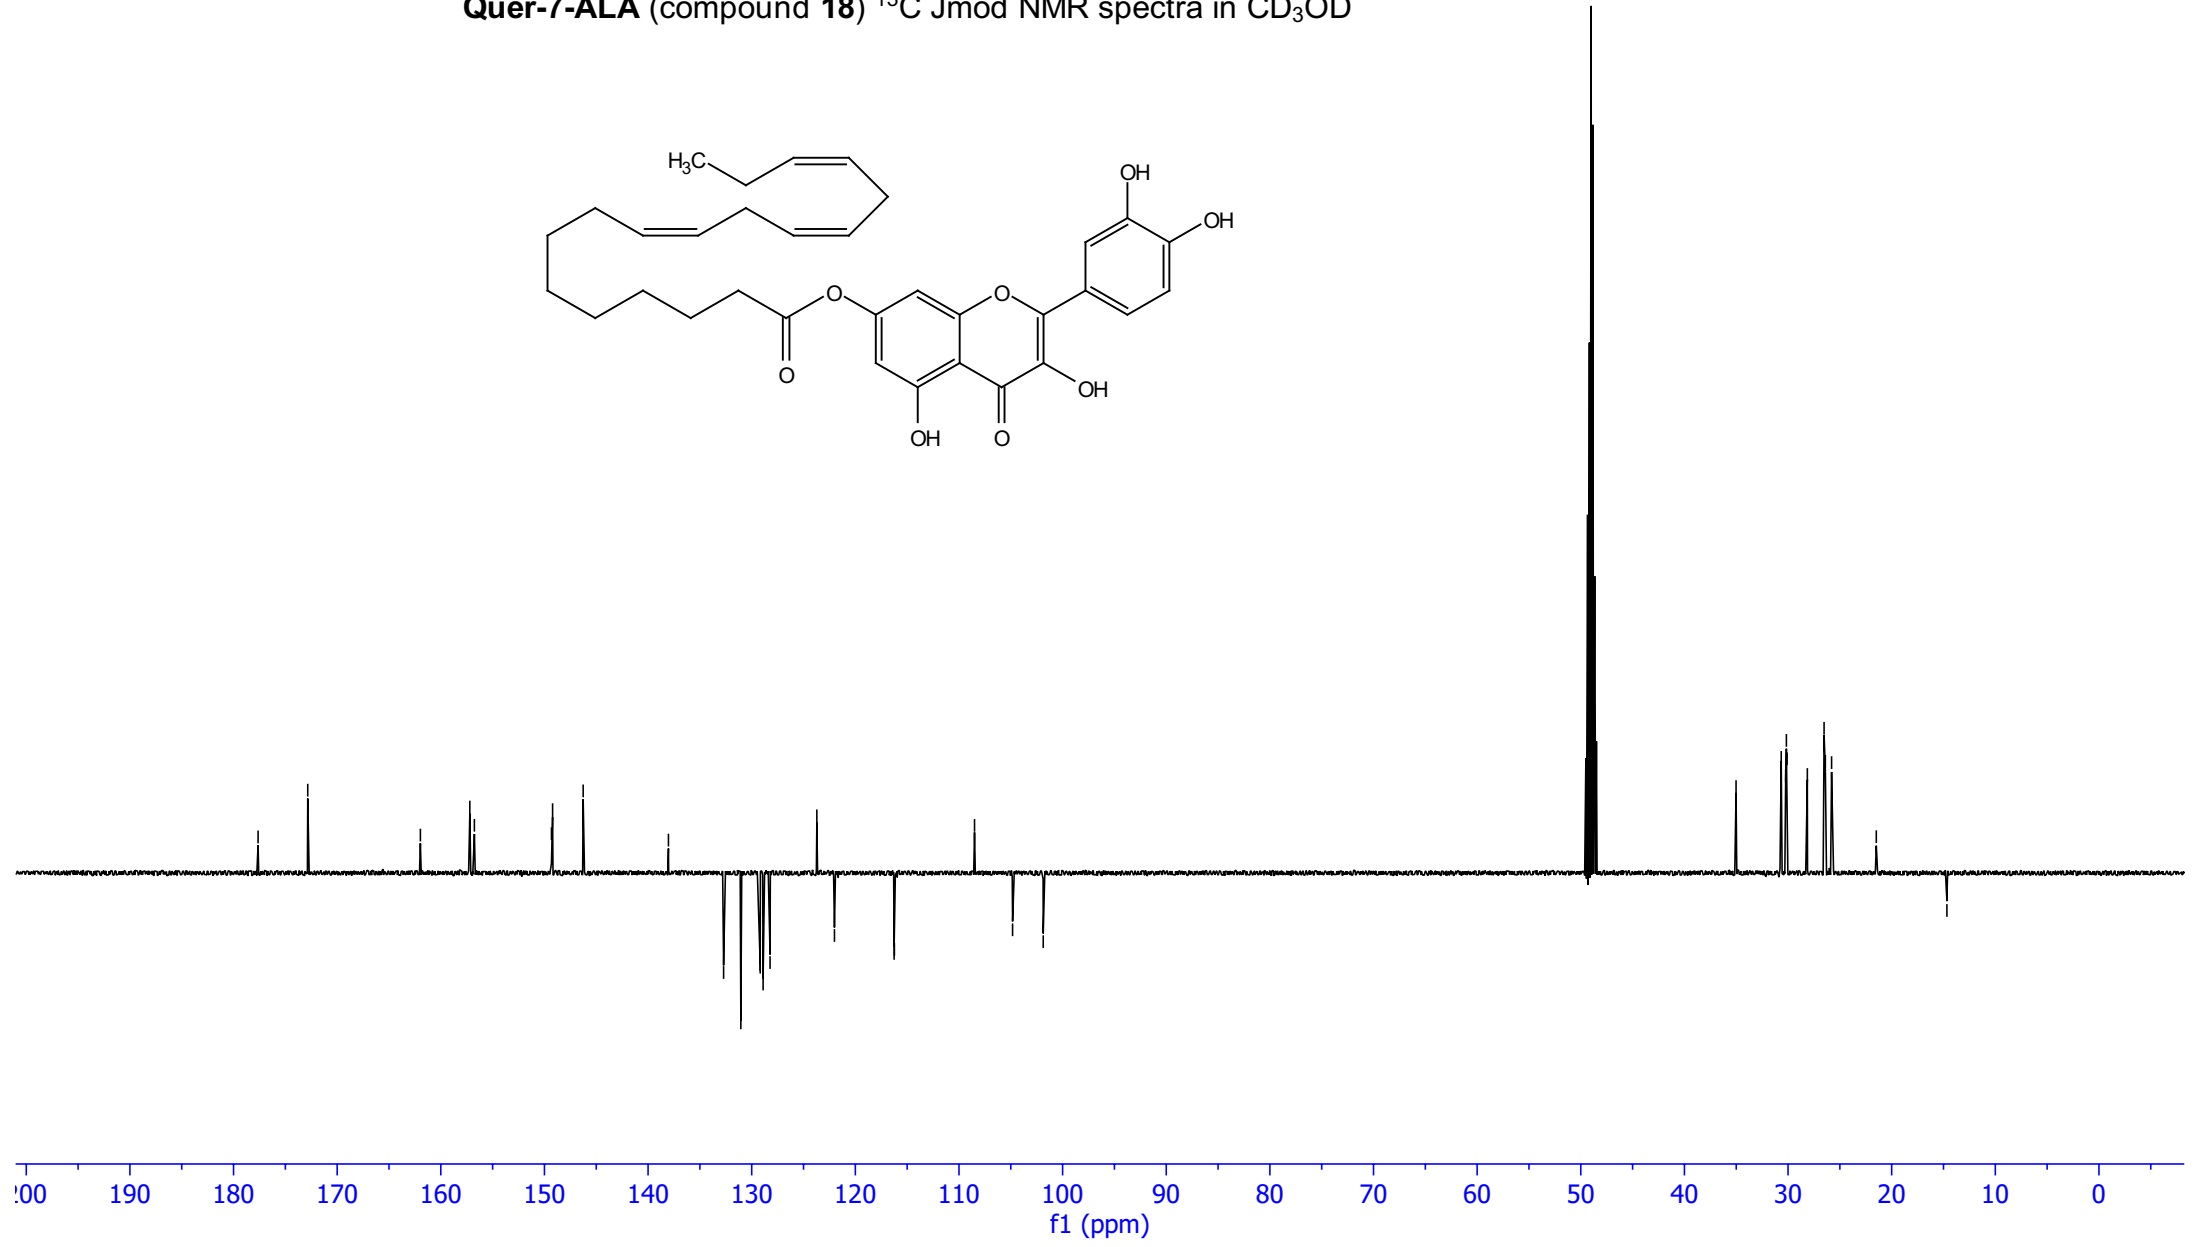

Supplement: antioxidants-07-00197-s001.pdf [file antioxidants-07-00197-s001.pdf]
